---

**A compilation of large subunit RNA sequences presented in a structural format**

---

Robin R. Gutell\* and George E. Fox<sup>1</sup>

---

Department of Microbiology, University of Illinois, Urbana, IL 61801 and <sup>1</sup>Department of Biochemical and Biophysical Sciences, University of Houston, TX 77004, USA

---

**INTRODUCTION**

The present review provides a summary of all the published large subunit rRNAs as of December 1987. Instead of the usual linear alignment the sequences are tabulated here as a series of secondary structure diagrams in which individual nucleotides are indicated. The reasons for this departure from past practice are several. The foremost is simply that in our experience this format is more useful. For example, considerable effort is now being expended to study the higher order structure of the large rRNAs. Thus it is common to be reading a paper only to find reference to position X in Sequence Y. With diagrams such as those provided here the reader will be able to readily identify such statements in the context of the known major outline of the secondary structure of Sequence Y or for that matter any other published sequence. Secondly this collection, as is traditional, tabulates all the currently known sequences in one place. Finally we believe the collection as a whole is educational in that it will make the reader aware of the extent of secondary structure variation in the large subunit RNAs and the magnitude of work that still could be done to further refine the secondary structures by collection of appropriate additional data.

**ORIGIN OF THE STRUCTURE**

All of the structure diagrams are drawn in a format that coincides with that used for Escherichia coli. The E. coli structure itself is based on a secondary structure model first published in 1981 (1). The present version contains important unpublished modifications made by Gutell, Noller and Woese (2) and further unpublished refinements (Gutell, Noller and Woese, unpublished results; Jurka and Fox, unpublished results). All of the structures shown were established by comparative sequence analysis as discussed below. Due to data limitations some regions of some of the sequences are best regarded as of unknown structural content at this time. No attempt has been made here to compare the structures presented to the various sequence specific secondary structures that frequently accompany the publication of each sequence, though excellent agreement exists with one recently published general model (3). Likewise no putative tertiary interactions have been indicated on the figures though a few are known (Gutell, unpublished results and ref (3)). In many cases there is evidence for a pseudoknot in the

vicinity of E. coli position 2350 (Gutell, unpublished results and ref (3)) and when that evidence is favorable the interaction is indicated on the figures.

#### COMPARATIVE SEQUENCE ANALYSIS

For pragmatic reasons the primary tool used in constructing the individual structures has been comparative (or phylogenetic) analysis. This approach had its origin in the discovery of the cloverleaf structure for tRNA (4). It first began to reach its modern form with the analysis of 5S rRNA (5) and has emerged as a well documented procedure (2,6-8) The underlying assumption is that functionally equivalent regions of the large rRNAs from phylogenetically diverse sources will have biologically equivalent structures. The procedure begins by aligning the primary sequences using conserved sequence segments as a guide. Next the various columns of bases are individually intercompared to detect compensating base changes that maintain Watson-Crick complementarity between the potential pairing regions. If an individual helical element is independently tested several times it is considered phylogenetically proven.

The comparative method has certain limitations that the reader should appreciate in perusing the figures presented here. First and foremost is the need for sequences that exhibit the structure being studied. For highly conserved features this may be the entire data base. In other cases features may be extremely variable so that particular versions are only found in individual phylogenetic groups, mammalian mitochondria for example. Secondly the feature must exhibit sequence variation within the subset of sequences that contain the feature. Without such variation a region can not be structured. Thirdly it should be recognized that the approach necessarily produces minimal structures. It is the nature of the method to allow the identification of additional features as the data base grows. Thus, for example, the continuing refinement of the E. coli structure discussed above. Finally it should be appreciated that it is very difficult to assess the significance of base pairs that can extend a particular helix in some organisms but not all. Such base pairs are strongly supported by thermodynamic arguments but conflict with the comparative concept. The proper resolution in such circumstances may have to wait until such time that more high resolution structure data is available.

#### CURRENT DATA BASE

As of late in 1987 there were 40 distinct complete large subunit RNA sequences published and at least five extensive partial sequences in which at least 500 bases of the large subunit RNA have been sequenced (We have not exhaustively searched for these). In addition in some instances sequence information is available from more than one large subunit RNA gene from the same organism. Multiple rRNA genes frequently exhibit heterogeneity in sequence and this phenomena may be of more than academic interest. The present collection does not address this matter however and in those few instances where information from more than one large subunit rRNA gene is available we have arbitrarily picked one sequence for inclusion

here. The 40 known sequences provide a diverse sample covering the three major kingdoms; eubacteria, archaebacteria and eukaryotes as well as the organelles. Table 1 lists the sequences, the common name of the RNAs involved, the total length of the large subunit RNA inclusive of fragments such as 5.8S and 4.5S rRNAs, at least one relevant GENBANK/EMBL accession numbers if the sequence is in the data bases, a highly abbreviated reference and a key to the complete references that accompany this text.

#### HOW TO READ THE DIAGRAMS

The structure diagrams were drawn to a single scale so that they may be readily superimposed or intercompared. This was accomplished by a computer program described elsewhere (6). Each diagram encompasses two pages with a crossover point to the next page indicated. In most bacterial cases a possible helical structure exists between the 5' and 3' termini of the molecule. It is uncertain whether this helix is present in the functional RNA or is simply a remnant of processing. In any event the reader needs to be aware that when it is possibly present it appears on both halves of the figure. Extensive base numbering occurs on the E. coli diagram. On the other sequence diagrams only occasional numbers are included. These occasional numbers refer to the specific sequence on which they appear. In those cases in which more than one molecule is included (eg 5.8S and 28S RNAs) each is numbered separately.

When a region contains no known structure it is drawn by the computer program as a circular loop. In order to maintain the scale and layout of the drawings it is not always possible to draw large uncharacterized regions as unstructured loops. When this occurs the region of unknown structure is included as a detached linear array listed from 5' to 3'. The Homo sapiens and other eukaryotic cytoplasmic sequences contain many examples of this, though the same phenomenon will also be seen on mitochondrial and chloroplast diagrams. These linear arrays are labeled with a bold letter and the positions included in the array indicated. A second bold letter specifies where in the sequence the linear array belongs. These bold letters are used in a consistent fashion so that a large unstructured area at the same location in several diagrams always receives the same bold letter. In a few instances the uncharacterized array is small enough to be shown as a loop in some but not all the diagrams. In those instances a bold letter is used to label the loops so that it is obvious that an equivalent unstructured region is present.

The reader should not conclude that the regions assigned bold letters are the only unstructured regions. Whenever room exists the computer program draws the unstructured regions as a large loop. A letter has only been assigned if the computer has used the linear array display in at least one case. Many of the unlabeled unstructured regions are rather large. Obvious examples can be seen by examining any of the mammalian mitochondria structures. Thus in many of the sequences presented here local regions which are often substantial in size are shown as unstructured. These regions clearly have a different

Table 1. Listing of Large Subunit RNA Sequences that have been completely or extensively sequenced.

| ORGANISM                                        | RNA TYPE     | LENGTH | SHORT REFERENCE                                             | ACCESSION #              | FIGURE # | REFERENCE #    |
|-------------------------------------------------|--------------|--------|-------------------------------------------------------------|--------------------------|----------|----------------|
| <b>A: EUBACTERIA</b>                            |              |        |                                                             |                          |          |                |
| 1. <i>Escherichia coli</i>                      | 23S          | 2904   | PNAS 77: 201 1980                                           | J01695                   | 1        | 17             |
| 2. <i>Pseudomonas aeruginosa</i>                | 23S          | 2893   | NAR 15:7182 1987                                            | Y00432                   | 2        | 18             |
| 3. <i>Bacillus subtilis</i>                     | 23S          | 2927   | GENE 37: 261 1985                                           | K00637, M10606           | 3        | 19             |
| 4. <i>Bacillus pasteurii</i>                    | 23S          | 2928   | DNA 3: 347 1984                                             | —                        | 4        | 20             |
| 5. <i>Anacystis nidulans</i>                    | 23S          | 2876   | GENE 24: 219 1983<br>NAR 12: 3373 1984                      | X00512<br>X00343         | 5        | 21<br>13       |
| Chloroplasts                                    |              |        |                                                             |                          |          |                |
| 6. <i>Zea mays</i>                              | 23S & 4.5S   | 2981   | NAR 9: 2853 1981                                            | X01365                   | 6        | 22             |
| 7. <i>Nicotiana tabacum</i>                     | 23S & 4.5S   | 2907   | EJB 124: 13 1982                                            | J01446, J01447           | 7        | 23             |
| 8. <i>Marchantia polymorpha</i>                 | 23S & 4.5S   | 2914   | Nature 322:572 1986                                         | X04465, X01647           | 8        | 24             |
| 9. <i>Chlorella ellipsoidea</i>                 | 23S          | 3207   | Cur.Gen. 11:347 1987                                        | —                        | 9        | 14             |
| Mitochondria                                    |              |        |                                                             |                          |          |                |
| 10. <i>Zea mays</i>                             | 26S          | 3549   | PLASMID 11: 1984                                            | K01868                   | 11       | 25             |
| 11. <i>Oenothera lamarckiana</i>                | 26S          | 3265   | Cur.Gen. 9: 1985                                            | —                        | 12       | 26             |
| 12. <i>Aspergillus nidulans</i>                 | —            | 2768   | NAR 10: 4795 1982                                           | —                        | 13       | 27             |
| 13. <i>Saccharomyces cerevisiae</i>             | 21S          | 3273   | NAR 11: 339 1983                                            | J01527                   | 14       | 28             |
| 14. <i>Schizosaccharomyces pombe</i>            | —            | 2705   | EJB 169: 527 1987                                           | —                        | —        | 29             |
| 15. <i>Paramecium primaurelia</i>               | 7S & 20S     | 2634   | NAR 9: 6391 1981                                            | K00634                   | 15       | 30             |
| 16. <i>Paramecium tetraurelia</i>               | 7S & 20S     | 2631   | JBC 259: 5173 1984                                          | K01749                   | —        | 31             |
| 17. <i>Homo sapiens</i>                         | 16S          | 1559   | Nature 290: 457 1981                                        | J01415                   | 17       | 32             |
| 18. <i>Mouse</i>                                | 16S          | 1582   | Cell 22:157 1980                                            | J01420                   | 18       | 33             |
| 19. <i>Rat</i>                                  | 16S          | 1559   | NAR 9:4139 1981                                             | J01438                   | 19       | 34             |
| 20. <i>Bovine</i>                               | 16S          | 1571   | JMB 156: 683 1982                                           | J01394                   | 20       | 35             |
| 21. <i>Xenopus laevis</i>                       | 16S          | 1640   | JBC 260: 9759 1985                                          | M10217, X00136           | 21       | 36             |
| 22. <i>Drosophila yakuba</i>                    | —            | 1326   | NAR 13: 4029 1985                                           | —                        | 22       | 37             |
| 23. <i>Aedes albopictus</i> (mosquito)          | —            | 1335   | NAR 12: 7771 1984                                           | X01078                   | 23       | 38             |
| 24. <i>Crithidia fasciculata</i>                | 12S          | 1141   | NAR 13: 4171 1985                                           | X02548                   | 25       | 39             |
| 25. <i>Trypanosoma brucei</i>                   | 12S          | 1152   | NAR 13: 4171 1985                                           | X02547                   | 26       | 39             |
| 26. <i>Leishmania tarentolae</i>                | 12S          | 1157   | NAR 13: 2337 1985                                           | —                        | 27       | 40             |
| <b>B: ARCHAEABACTERIA</b>                       |              |        |                                                             |                          |          |                |
| 27. <i>Halococcus morrhuae</i>                  | 23S          | 2927   | JMB 195: 43 1987                                            | —                        | 29       | 3              |
| 28. <i>Halobacterium halobium</i>               | 23S          | 2905   | MGG 202: 152 1986                                           | X03047, X00872           | 30       | 41             |
| 29. <i>Methanococcus vannielii</i>              | 23S          | 2958   | MGG 200: 305 1985                                           | —                        | 31       | 42             |
| 30. <i>Methanobacterium thermoautotrophicum</i> | 23S          | 3019   | JMB 195: 43 1987                                            | —                        | 32       | 3              |
| 31. <i>Desulfurococcus mobilis</i>              | 23S          | 3077   | JMB 195: 43 1987                                            | —                        | 33       | 3              |
| 32. <i>Thermoproteus tenax</i>                  | 23S          | 3031   | NAR 15: 4821 1987                                           | Y00346                   | —        | 43             |
| <b>C: EUKARYOTIC CYTOPLASMIC</b>                |              |        |                                                             |                          |          |                |
| 33. <i>Saccharomyces cerevisiae</i>             | 5.8S & 25S   | 3549   | NAR 9: 6953 1981<br>JBC 248: 3860 1973                      | J01355                   | 35       | 44<br>45       |
| 34. <i>S. carlsbergensis</i>                    | 5.8S & 26S   | 3550   | NAR 9: 6935 1981                                            | V01285                   | —        | 46             |
| 35. <i>Homo sapiens</i>                         | 5.8S & 28S   | 5184   | PNAS 82: 7666 1985                                          | K03433, K03434           | 36       | 47             |
| 36. <i>Mouse</i>                                | 5.8S & 28S   | 4869   | NAR 4: 2495 1977<br>NAR 12: 3563 1984<br>NAR 10: 5273 1982  | X00525                   | 37       | 48<br>49<br>50 |
| 37. <i>Rat</i>                                  | 5.8S & 28S   | 4943   | NAR 11: 7819 1983<br>NAR 12: 3677 1984<br>RIBOSOMES 86: 391 | X01069, X01591<br>X00521 | 38       | 51<br>52<br>16 |
| 38. <i>Xenopus laevis</i>                       | 5.8S & 28S   | 4270   | NAR 11: 7795 1983<br>JBC 260: 9759 1985                     | X00136                   | 39       | 53<br>54       |
| 39. <i>Oriza sativa</i>                         | 5.8S & 25S   | 3541   | GENE 37: 255 1985                                           | M11585                   | 40       | 55             |
| 40. <i>Caenorhabditis elegans</i>               | 5.8S & 26S   | 3662   | NAR 14: 2345 1986                                           | X03680                   | 41       | 56             |
| 41. <i>Physarum polycephalum</i>                | 5.8S & 26S   | 3943   | PNAS 80:3163 1983                                           | V01159                   | 42       | 57             |
| 42. <i>Crithidia fasciculata</i>                | 5.8S & frag. | 4085   | NAR 10: 2379 1982<br>EMBO J. 6: 1063 1987                   | —                        | 43       | 58<br>12       |
| <b>Major Partial Sequences*</b>                 |              |        |                                                             |                          |          |                |
| 43. <i>Mycoplasma PG50</i>                      | 23S          | 869    | NAR 15: 1327 1987                                           | —                        | —        | 59             |
| 44. <i>Apis mellifera mito.</i>                 | —            | 1267   | NAR 15: 2388 1987                                           | —                        | —        | 60             |
| 45. <i>Dicyclostellium discoidium</i>           | 5.8S & 28S   | 3471   | NAR 12: 4171 1984                                           | X00601                   | —        | 61             |
| 46. <i>Lytechinus variegatus</i>                | 5.8S & 28S   | 664    | NAR 12: 1737 1984                                           | X00350                   | —        | 62             |
| 47. <i>Chimpanzee</i>                           | 28S          | 1429   | PNAS 82: 766 1985                                           | K03433                   | —        | 47             |

\* Lengths indicated represent the portion of the molecule for which sequence has been published.

structure than is seen in E. coli or some of the other molecules but we do not as yet know what it is.

This should not be seen as bothersome but rather as defining an opportunity to obtain data from additional organisms in order to allow resolution of the problem area. In many cases the difficulty stems from the fact that too few sequences are available or too little sequence variation has been displayed in the known sequences to deduce a structure. In a few cases time did not permit a thorough analysis and a recognizable structural feature may have been overlooked. Also the reader should realize that the comparative approach is a convergent one. The current model should at best be perceived as a minimal one awaiting the discovery of additional interactions. Thus small two and three base helices may ultimately be found even in regions in which considerable structure has already been identified as more data accumulates.

#### 5.8S RNA, 4.5S RNA AND OTHER LARGE SUBUNIT FRAGMENTS

It is one of the peculiarities of the large subunit RNA that it is sometimes genetically fragmented. The most well known example is the 5.8S rRNA and its equivalents that are found in most eukaryotic organisms. This RNA has been shown (9,10) to be homologous to approximately the first 150 positions of the E. coli 23S rRNA. Although genetically distinct it interacts with the large subunit RNA through base pairing. In effect then the two together form a single RNA with a backbone nick in one of its loops. The same phenomenon is also seen at the 3' end of several chloroplast large subunit RNAs where the last 100 or so bases are separately encoded as a 4.5S RNA (11). In this case the homology to the E. coli 3' terminus is obvious but the mechanism by which the 4.5S rRNA and the main large subunit RNA component are held together is not. The most extreme case of this fragmentation phenomenon that is known is in Crithidia fasciculata where the large subunit RNA is actually assembled from six fragments plus a 5.8S rRNA (12). These various fragmentation phenomenon are indicated on the diagram by labels that indicate where the respective 5' and 3' ends are located. The Crithidia fragments are labeled with the same lower case letters that were used in the original publication (12) and numbered as if they were a single large RNA.

#### OVERLAY DIAGRAMS AND COLLECTION ARRANGEMENT

It is very useful in comparing structures to produce overlay diagrams that display one structure relative to another. Several such diagrams are included here. In each case the underlying structure is that of E. coli. Where the E. coli is unique it can be seen as a light gray. The bold structure is that of the other organism indicated in the legend. Base numbers on these diagrams always refer to E. coli. These overlay figures show immediately where the sites of structural variation between the two RNAs are located. The overlay figures are used to introduce the various sections of the collection. In each case a particularly representative overlay is chosen so that the major variations in the group relative to E. coli can be seen.

The collection begins with the five eubacterial sequences.

These are virtually identical structurally and therefore no overlay figure is included. They are followed by the four chloroplast figures which again follow the virtually identical structural pattern. The *Anacystis* sequence used was arbitrarily that of Douglas and Doolittle (13). The plant chloroplasts all have a detached 4.5S at the 3' terminus but the alga, *Chlorella ellipsoidea* does not. The *C. ellipsoidea* sequence also is unusual in that it is claimed to contain an intron (14). We believe that this assertion is not convincingly established and thus the putative intron is shown on Figure 9a as an insertion region of class D. Several large subunit sequences have an insertion at this location. If the *C. ellipsoidea* insertion is in fact an intron this would be very atypical as none of the known large subunit introns correspond with common insertion regions. It is possible that experimental difficulties may have arisen due to the propensity of large subunit RNAs such as *E. coli* 23S rRNA (15) to readily fragment. The location of this fragmentation site has been localized in *E. coli* (1) to the region of the RNA that corresponds to that which contains the putative intron in *C. ellipsoidea*.

The largest portion of the collection contains the mitochondrial sequences. These are assembled into three groups each prefaced by a separate overlay figure. The first and most internally variable group are those with large mitochondrial RNAs as typified by the overlay of *Zea mays*, Fig. 10. These mitochondrial RNAs resemble the eubacterial ones in size and structure more than any of the other mitochondria do. Nevertheless they are marked by considerable variability even within the group. One unifying feature is the presence of an unstructured region H in the vicinity of *E. coli* position 1400 in all cases. Structures are provided for all of these RNAs except *Paramecium tetraurelia* which is virtually identical to *P. primaurelia*, Fig. 15, and *Schizosaccharomyces pombe* which was published after the structures were completed. The second major mitochondrial group are the rather small 16S RNAs that are found in most higher organisms. Although much smaller, as the human overlay shows, Fig. 16, considerable structural similarity with the eubacterial RNAs continues to exist. Finally the three kinetoplast mitochondrial 12S rRNAs follow. Here as is indicated by the overlay, Fig. 24, virtually none of the structure in the 5' half of the molecule is preserved, though considerable structural conservation does exist in the 3' half of the molecule.

The remaining figures are devoted to the archaebacteria and eucaryotic cytoplasm. As indicated by the *Halococcus morrhuae* structural overlay, Fig. 28, the archaebacteria exhibit significant variation that exceeds anything that is seen among the eubacteria alone. Close examination of the archaebacterial figures also reveals that unlike the eubacteria, the archaebacteria, do exhibit some variation within the group as a whole. A figure is not included for *Thermoproteus tenax* because this sequence was inadvertently overlooked. The main theme from the eucaryotic cytoplasmic sequences seems to be growth in size. Although not all the RNAs exhibit the effect to the same extent it is clear that several regions seem to be favored for macroscopic insertions of new material. As indicated by the *Saccharomyces cerevisiae* overlay, Fig. 34, the main theme of

secondary structure is again repeated in the eukaryotic cytoplasmic RNAs. Excluding the large insertions, the eukaryotic RNA structure is remarkably like that of the eubacteria and archaeobacteria. The sequence of *S. carlsbergensis* 26S rRNA is very similar to that of *S. cerevisiae* and thus is not shown as a separate figure. In the case of rat, the corrected sequence (16) has been chosen for the figure presented here.

#### AVAILABILITY AND ACCURACY OF THE DATA

The sequences presented here are maintained in aligned data bases according to phylogenetic type. Due to the numerous macroscopic insertions and deletions no attempt is made to maintain a single aligned data base of all the sequences. We therefore cannot provide such an alignment on electronic medium. We can however provide individual sequences. Alternatively the interested reader may get sequences directly from the electronic databases. When base ambiguity existed the IUPAC nomenclature recommendations were followed. Post-transcriptional modifications have not been indicated since these have not been determined in most cases. The reader should be aware however that the large rRNAs do have a number of such modified nucleotides. In the case of the 5.8S rRNAs which mostly have been sequenced at the RNA level the post-transcriptional modifications are frequently known, though not indicated here. The sequences presented here and the position number labels have been extensively checked but nevertheless may contain an occasional error. The structures themselves are the best we currently have available. Although occasionally a helix indicated may be in error it is far more likely that one will have been overlooked. Readers are invited to inform us about errors and omissions of published sequences.

#### ACKNOWLEDGEMENTS

Dr. Robin Gutell's efforts in this undertaking were supported by NIH grant #GM-17129 to Dr. Harry F. Noller of the University of Santa Cruz and NASA grant NSG-7044 to Dr. Carl R. Woese at the University of Illinois. Dr. George E. Fox's efforts were supported by NASA grant NSG-7440 and NIH grant GM-37655.

\*Present address: GENPROBE Inc., 9880 Campus Point Drive, San Diego, CA 92121, USA

#### REFERENCES

1. Noller, H.F., Kop, J.A., Wheaton, V., Brosius, J., Gutell, R.R., Kopylov, A.M., Dohme, F., and Herr, W. (1981) Nucl. Acids Res. 9, 6167-6189.
2. Noller, H.F. (1984) Ann. Rev. Biochem. 53, 119-162.
3. Leffers, H., Kjems, J., Ostergaard, L., Larsen, N., and Garrett, R.A. (1987) J. Mol. Biol. 195, 43-61.
4. Holley, R.W., Apgar, J., Everett, G.A., Madison, J.T., Marquise, M., Merrill, S.H., Penswick, J.R., and Zamir, A., (1965) Science 147, 1462-1465.
5. Fox, G.E. and Woese, C.R. (1975) J. Mol. Evol. 6, 61-76.
6. Gutell, R., Weiser, B., Woese, C.R., and Noller, H.F. (1985) Prog. Nucl. Acids Res. & Mol. Biol. 32, 155-216.
7. Fox, G.E., (1985) in "The Bacteria" (C.R. Woese and R.S. Wolfe, eds.) 9, 257-310.

8. Olsen, G.J. (1983) Ph.D. thesis, Univ. Colorado
9. Nazar, R.N. (1980) FEBS Lett. 119, 212-214.
10. Walker, W.F. (1981) FEBS Lett. 126, 150-151.
11. MacKay, R.M. (1981) FEBS Lett. 123, 17-18.
12. Spencer, D.F., Collings, J.C., Schnare, M.N., and Gray, M.W., (1987) EMBO J. 6, 1063-1071.
13. Douglas, S.E. and Doolittle, W.F. (1984) Nucleic Acids Res. 12, 3373-3386.
14. Yamada, T., and Shimaji, M. (1987) Curr. Genet. 11, 347-352.
15. Allet, B., and Rochaix, J.D., (1979) Cell 18, 55-60
16. Wool, I.G. (1986) in Hardesty, B. and Kramer, G. (eds.), Structure, Function and Genetics of Ribosomes, Springer-Verlag, pp. 391-412.
17. Brosius, J., Dull, T.J., and Noller, H.F. (1980) Proc. Natl. Acad. Sci. USA 77, 201-204.
18. Toschka, H.Y., Hopfl, P., Ludwig, W., Schleifer, K.H., Ulbrich, N. and Erdmann, V.A. (1987) Nucleic Acids Res. 15, 7182.
19. Green, C.J., Stewart, G.C., Hollis, M.A., Vold, B.S. and Bott, K.F. (1985) Gene 37, 261-266.
20. Kop, J., Wheaton, V., Gupta, R., Woese, C.R. and Noller, H.F. (1984) DNA 3:347-357.
21. Kumano, M., Tomioka, N. and Sugiura, M. (1983) Gene 24, 219-225.
22. Edwards, K. and Kossel, H. (1981) Nucleic Acids Res. 9, 2853-2860.
23. Takaiwa, F. and Sugiura, M. (1982) Eur. J. Biochem. 124, 13-19.
24. Ohyama, K., Fukuzawa, H., Kohchi, T., Shirai, H., Sano, T., Sano, S., Umesono, K., Shiki, Y., Takeuchi, M., Chang, Z., Aota, S., Inokuchi, H., Ozeki, H. (1986) Nature 322, 572-574.
25. Dale, R.M.K., Mendu, N., Ginsburg, H. and Kridl, J.C. (1984) Plasmid 11, 141-150.
26. Manna, E. and Brennicke, A. (1985) Curr. Genet. 9, 505-515.
27. Kochel, H.G. and Kuntzel, H. (1982) Nucleic Acids Res. 10, 4795-4801.
28. Sor, F. and Fukuhara, H. (1983) Nucleic Acids Res. 11, 339-348
29. Lang, B.F., Cedergren, R., and Gray, M.W. (1987) Eur. J. Biochem. 169, 527-537.
30. Seilhamer, J.J. and Cummings, D.J. (1981) Nucleic Acids Res. 9, 6391-6406.
31. Seilhamer, J.J., Gutell, R.R., and Cummings, D.J., (1984) J. Biol. Chem. 259, 5173-5181.
32. Anderson, S., Bankier, A.T., Barrell, B.G., de Bruijn, M.H.L., Coulson, A.R., Drouin, J., Eperon, I.C., Nierlich, D.P., Roe, B.A., Sanger, F., Schreier, P.H., Smith, A.J., Staden, R. and Young, I.G. (1981) Nature 290, 457-465.
33. van Etten, R.A., Walberg, M.W., and Clayton, D.A. (1980) Cell 22, 157-170.
34. Saccone, C., Cantatore, P., Gadaleta, G., Gallerani, R., Lanave, C., Pepe, G. and Kroon, A.M. (1981) Nucleic Acids Res. 9, 4139-4148.
35. Anderson, A., de Bruijn, M.H.L., Coulson, A.R., Eperon, I.C., Sanger, F. and Young, I.G. (1982) J. Mol. Biol. 156, 683-717.
36. Roe, B.A., Ma, D-P., Wilson, R.K., and Wong, J.F-H. (1985) J. Biol. Chem. 260, 9759-9774.
37. Clary, D.O. and Wolstenholme, D.R. (1985) Nucleic Acids Res. 13, 4029-4045.
38. HsuChen, C-C., Kotin, R.M. and Dubin, D.T. (1984) Nucleic Acids Res. 12, 7771-7785.



39. Sloof, P., Van den Burg, J., Voogd, A., Benne, R., Agostinelli, M., Borst, P., Gutell, R., and Noller, H. (1985) *Nucleic Acids Res.* **13**, 4171-4190.
40. de la Cruz, V.F., Simpson, A.M., Lake, J.A. and Simpson, L. (1985) *Nucleic Acids Res.* **13**, 2337-2354.
41. Mankin, A.S. and Kagramanova, V.K. (1986) *Mol. Gen. Genet.* **202**, 152-161.
42. Jarsch, M. and Bock, A. (1985) *Mol. Gen. Genet.* **200**, 305-312.
43. Kjems, J., Leffers, H., Garrett, R.A., Wich, G., Leinfelder, W., and Bock, A. (1987) *Nucleic Acids Res.* **15**, 4821-4835.
44. Georgiev, O.I., Nikolaev, N., Hadjiolov, A.A., Skryabin, K.G., Zakharyev, V.M. and Bayev, A.A. (1981) *Nucleic Acids Res.* **9**, 6953-6958.
45. Rubin, G.M. (1973) *J. Biol. Chem.* **248**, 3860-3875.
46. Veldman, G.M., Klootwijk, J., de Regt, V., Planta, R.J., Branlant, C., Krol, A. and Ebel, J-P. (1981) *Nucleic Acids Res.* **9**, 6935-6952.
47. Gonzalez, I.L., Gorski, J.L., Campen, T.J., Dorney, D.J., Erickson, J.M., Sylvester, J.E. and Schmickel, R.D. (1985) *Proc. Natl. Acad. Sci. USA* **82**, 7666-7670.
48. Khan, M.S.N. and Maden, B.E.H. (1977) *Nucleic Acids Res.* **4**, 2495-2505.
49. Hassouna, N., Michot, B. and Bachellerie, J-P. (1984) *Nucleic Acids Res.* **12**, 3563-3583.
50. Michot, B., Bachellerie, J.P., and Raynal, F. (1982) *Nucleic Acids Res.* **10**, 5273-5283.
51. Chan, Y.L., Olvera, J., and Wool, I.G. (1983) *Nucleic Acids Res.* **11**, 7819-7831.
52. Hadjiolov, A.A., Georgiev, O.I., Nosikov, V.V., and Yavachev, L.P., (1984) *Nucleic Acids Res.* **12**, 3677-3693.
53. Ware, V.C., Tague, B.W., Clark, C.G., Gourse, R.L., Brand, R.C. and Gerbi, S.A. (1983) *Nucleic Acids Res.* **11**, 7795-7817.
54. Roe, B.A., Ma, D.-P., Wilson, R.K., and Wong, J.F.H. (1985) *J. Biol. Chem.* **260**, 9759-9774.
55. Takaiwa, F., Oono, K., Iida, Y. and Sugiura, M. (1985) *Gene* **37**, 255-259.
56. Ellis, R.E., Sulston, J.E. and Coulson, A.R. (1986) *Nucleic Acids Res.* **14**, 2345-2364.
57. Otsuka, T., Nomiyama, H., Yoshida, H., Kukita, T., Kuhara, S., and Sakaki, Y. (1983) *Proc. Natl. Acad. Sci. USA* **80**, 3163-3167.
58. Otsuka, T., Nomiyama, H., Sakaki, Y., and Takagi, Y. (1982) *Nucleic Acids Res.* **10**, 2379-2385.
59. Rasmussen, O.F. and Christiansen (1987) *Nucleic Acids Res.* **15**, 1327.
60. Vlasak, I., Burgshwaiger, S. and Kreil, G. (1987) *Nucleic Acids Res.* **15**, 2388.
61. Ozaki, T., Hoshikawa, Y., Iida, Y. and Iwabuchi, M. (1984) *Nucleic Acids Res.* **12**, 4171-4184.
62. Hindenach, B.R. and Stafford, D.W. (1984) *Nucleic Acids Res.* **12**, 1737-1747.

Secondary Structure of eubacterial 23S Ribosomal RNA: *Escherichia coli*

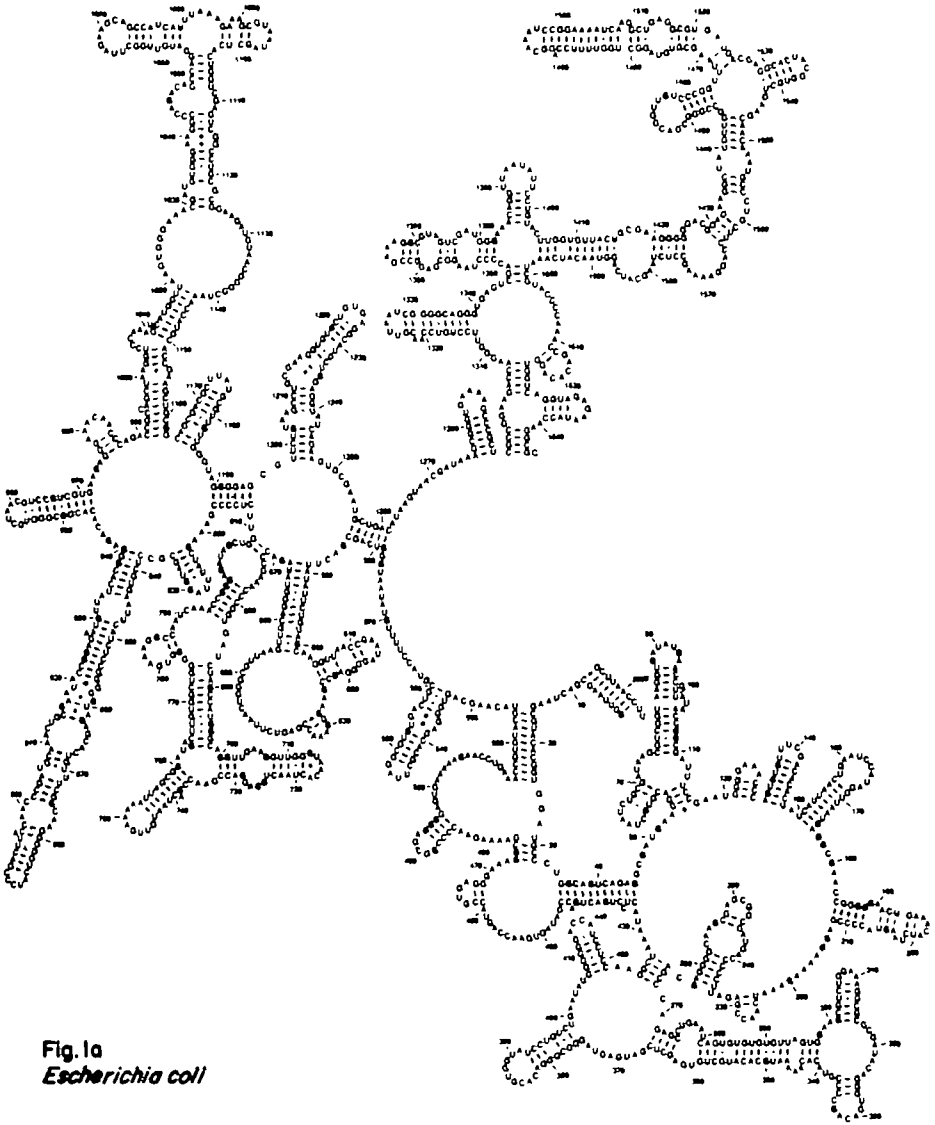

Fig. 1a  
*Escherichia coli*

Downloaded from <https://academic.oup.com/nar/article/16/suppl/1/75/2358536> by guest on 20 April 2024

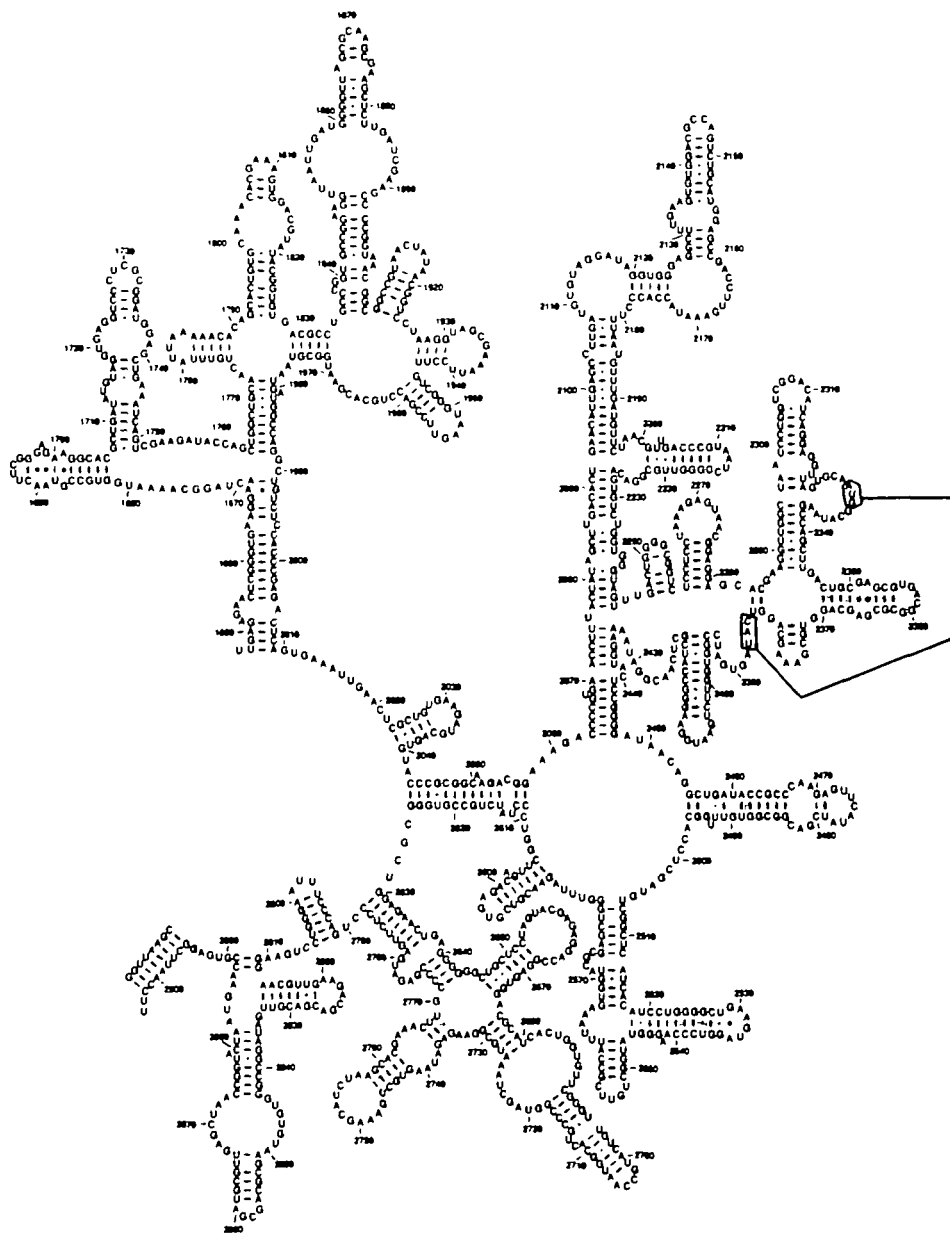

**Fig. 1b**  
*Escherichia coli*

Secondary Structure of eubacterial 23S Ribosomal RNA: 5'half

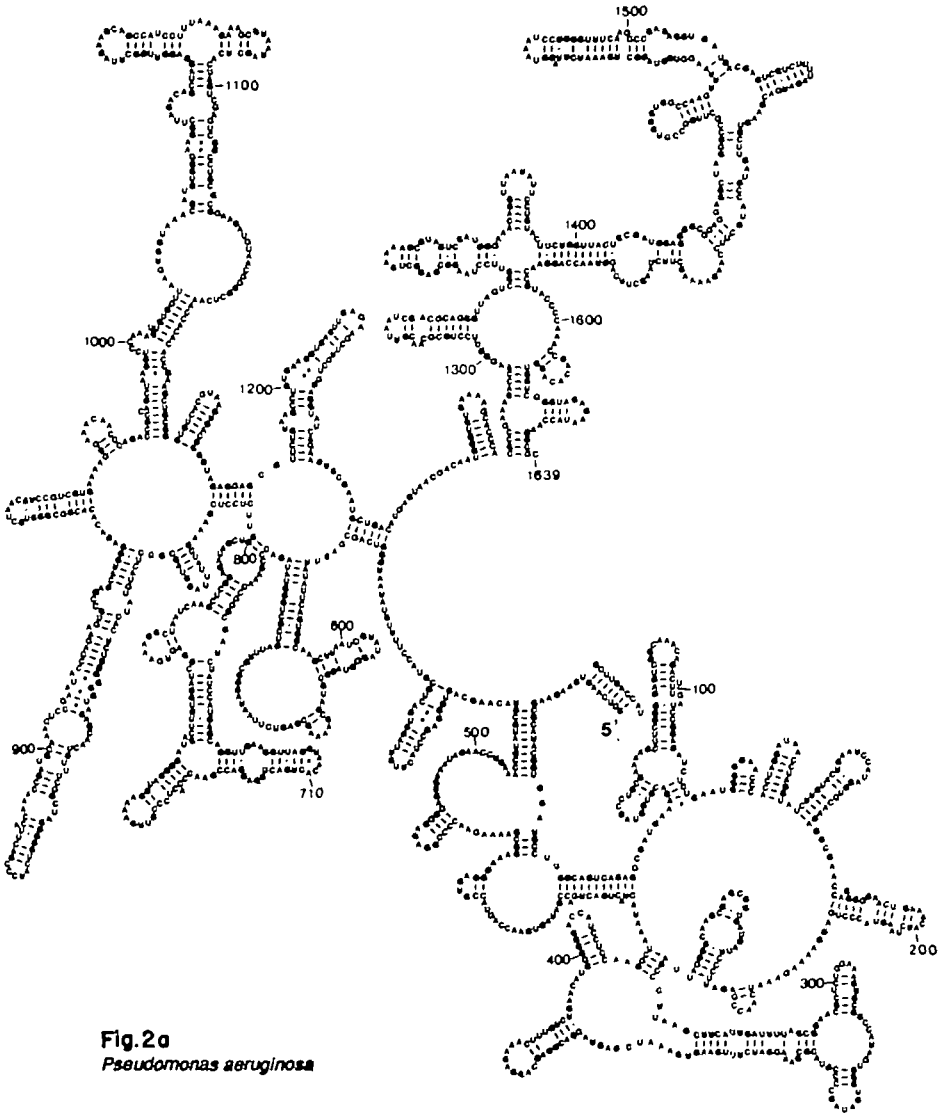

Fig. 2a  
*Pseudomonas aeruginosa*

Secondary Structure of eubacterial 23S Ribosomal RNA: 3'half

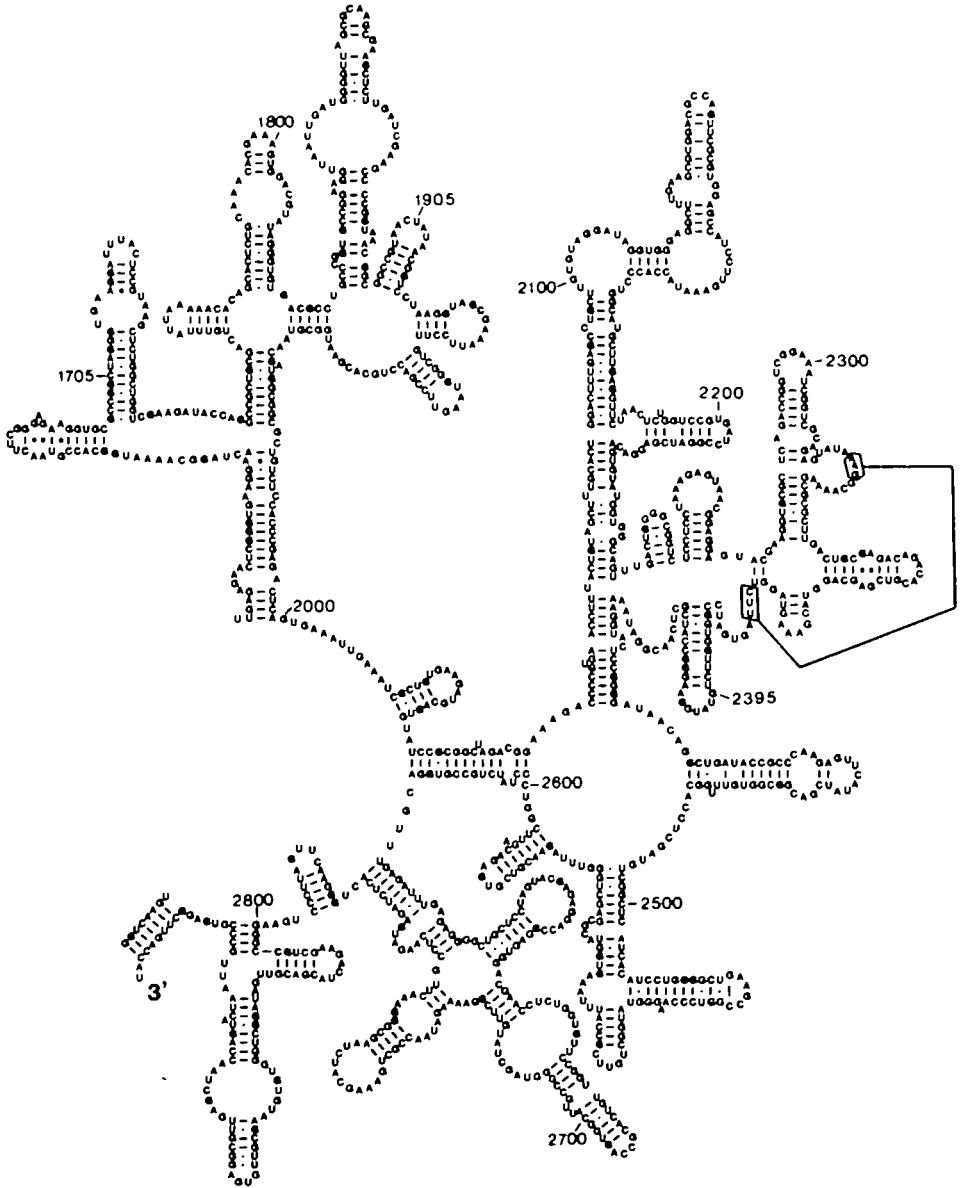

Fig.2b  
*Pseudomonas aeruginosa*

Downloaded from <https://academic.oup.com/nar/article/16/suppl/1/75/2358536> by guest on 20 April 2024

Secondary Structure of eubacterial 23S Ribosomal RNA: 5'half

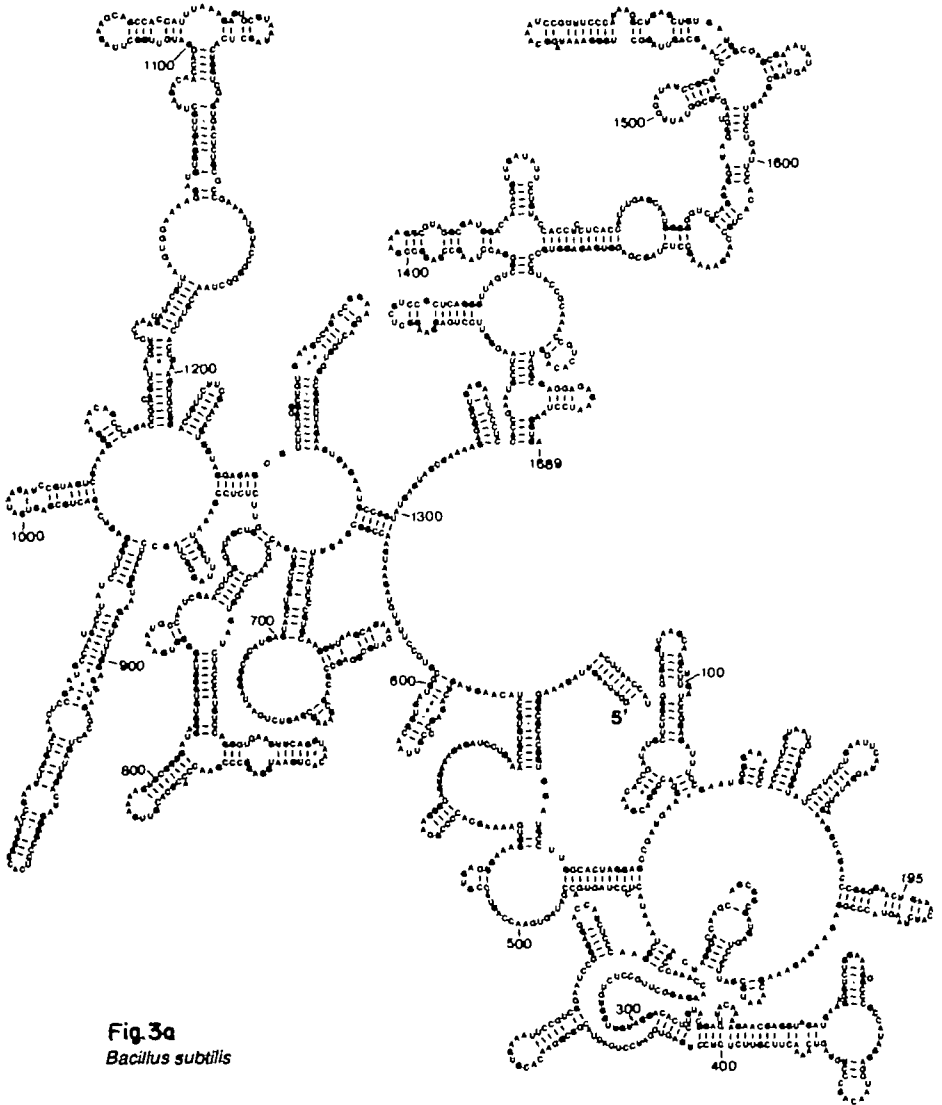

**Fig. 3a**  
*Bacillus subtilis*

Secondary Structure of eubacterial 23S Ribosomal RNA: 3' half

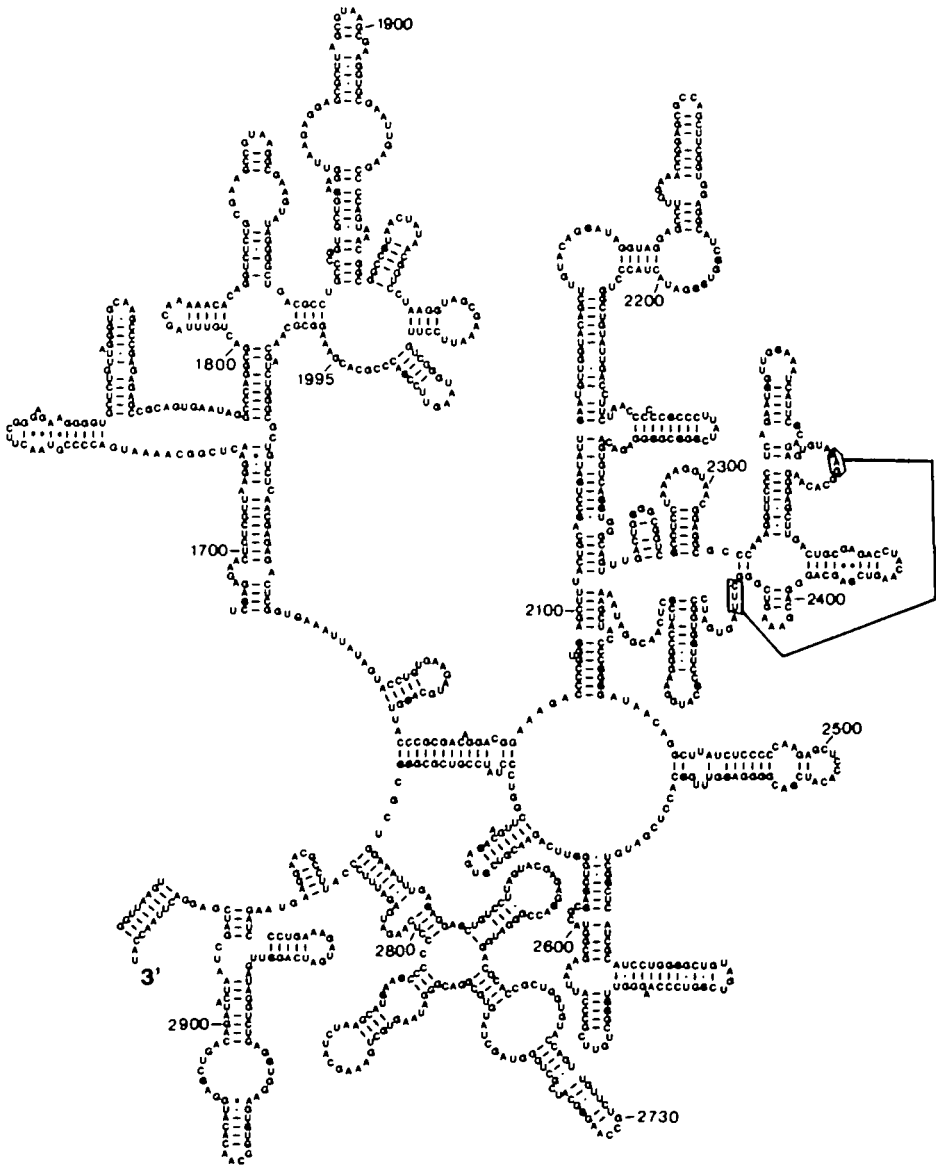

**Fig. 3b**  
*Bacillus subtilis*

Secondary Structure of eubacterial 23S Ribosomal RNA: 5'half

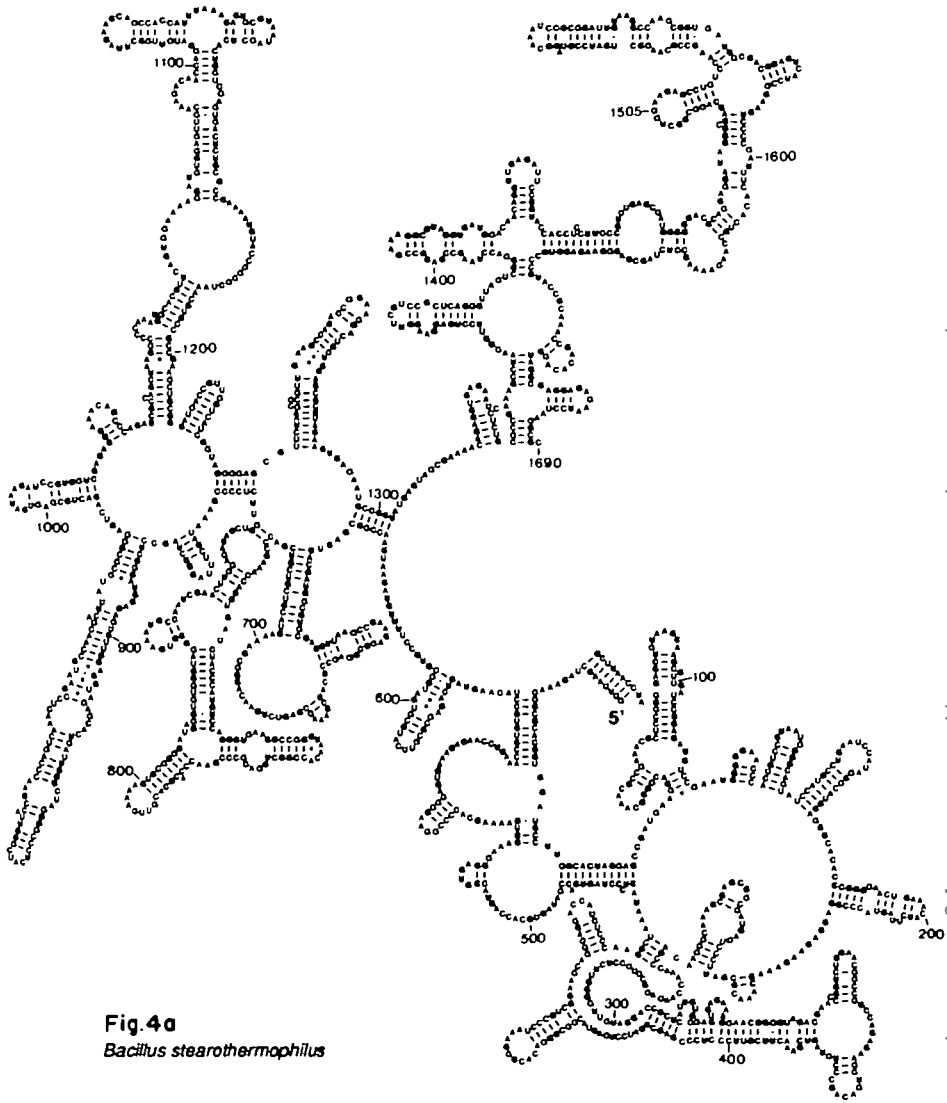

Fig. 4a  
*Bacillus stearothermophilus*

Downloaded from <https://academic.oup.com/nar/article/16/suppl/1/75/2358536> by guest on 20 April 2024



Secondary Structure of eubacterial 23S Ribosomal RNA: 3'half

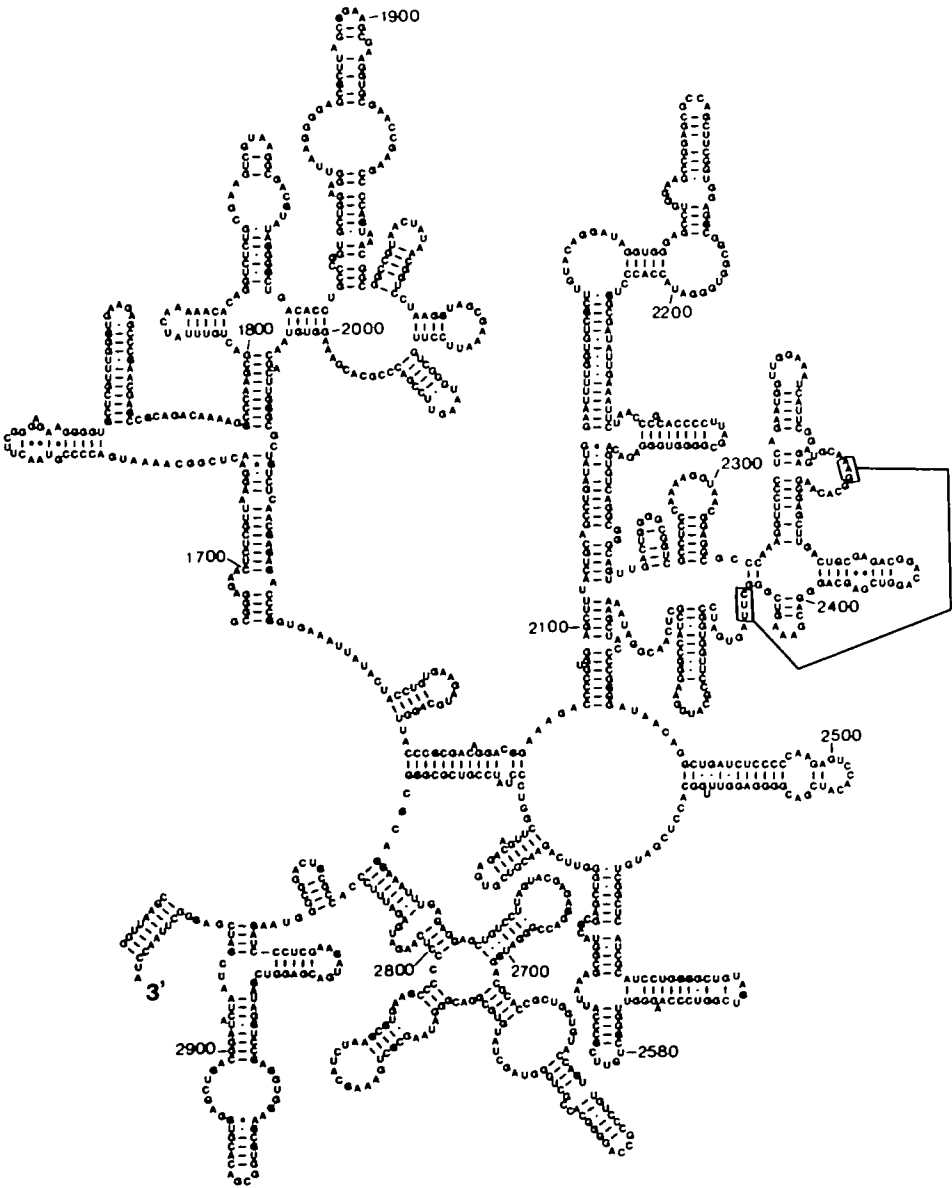

**Fig.4b**  
*Bacillus stearothermophilus*

Secondary Structure of eubacterial 23S Ribosomal RNA: 5'half

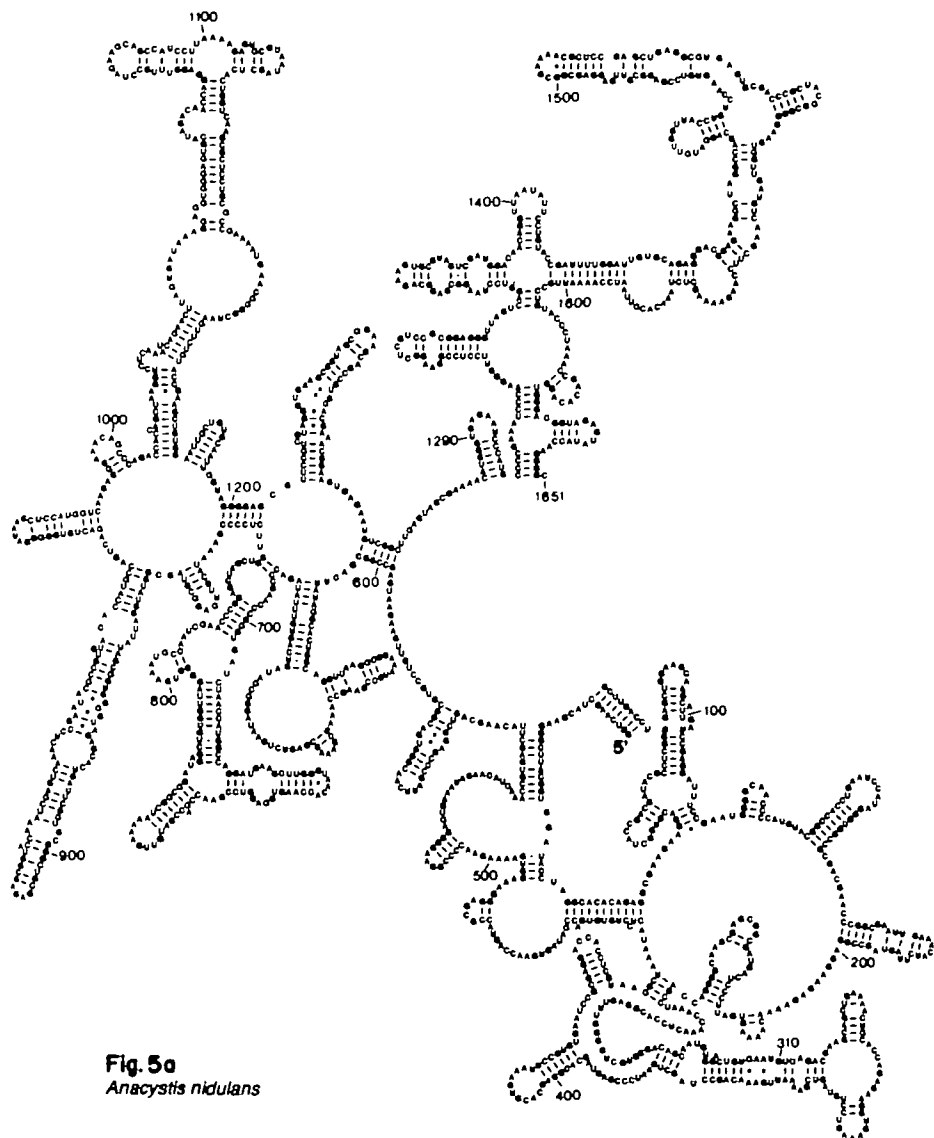

**Fig. 5a**  
*Anacystis nidulans*

Downloaded from <https://academic.oup.com/nar/article/16/suppl/1/75/2358536> by guest on 20 April 2024

Secondary Structure of eubacterial 23S Ribosomal RNA: 3' half

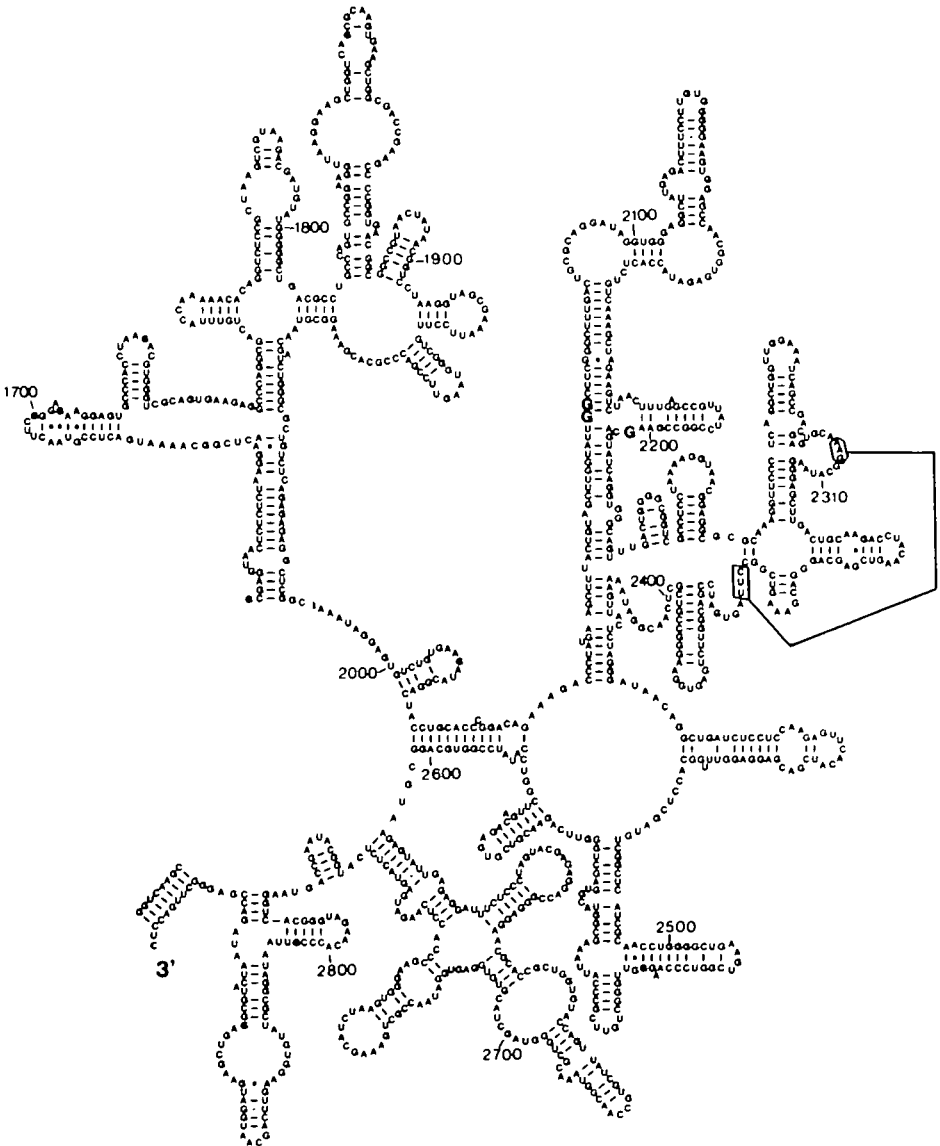

**Fig.5b**  
*Anacystis nidulans*

Secondary Structure of chloroplast 23S Ribosomal RNA: 5'half

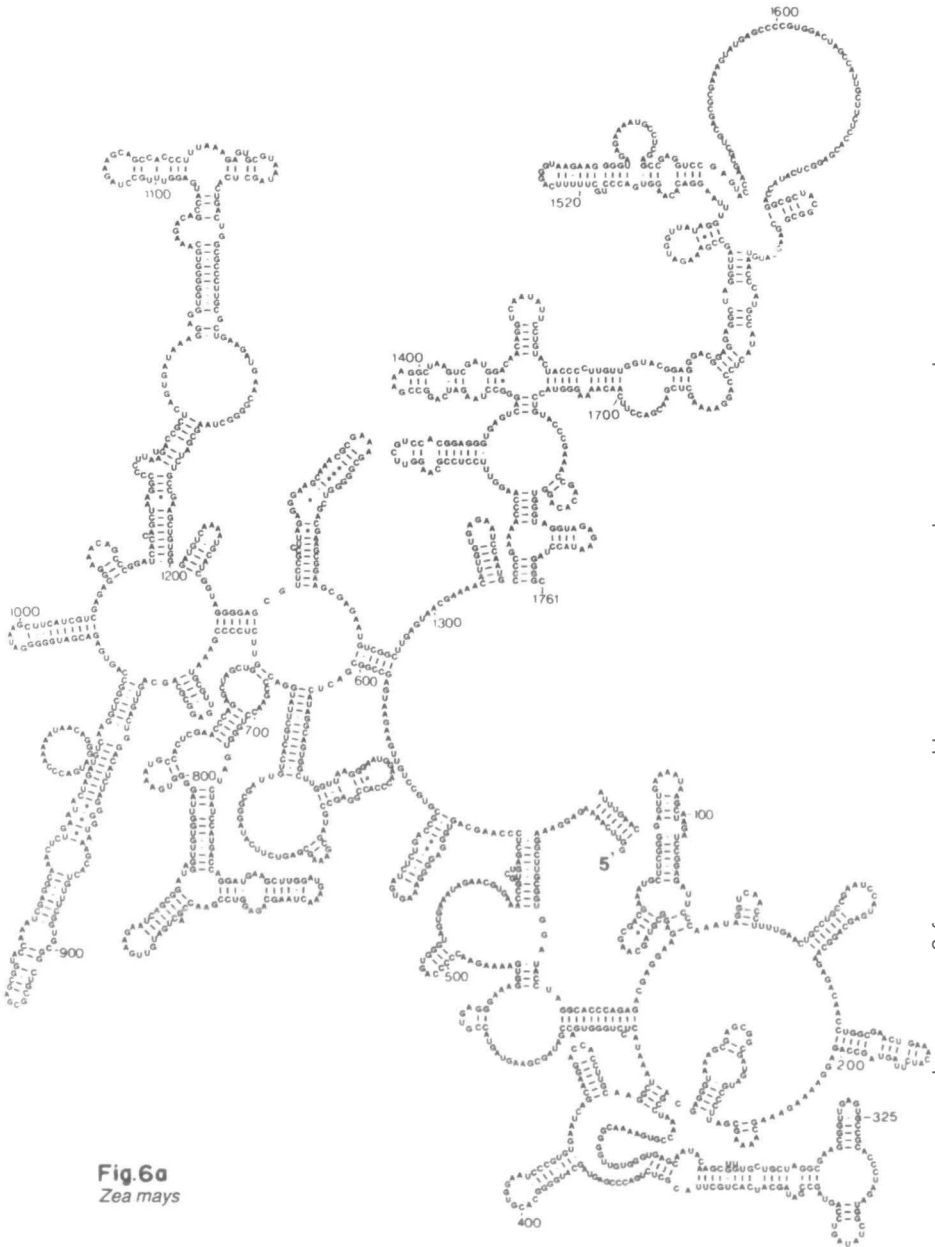

Fig.6a  
*Zea mays*

Downloaded from <https://academic.oup.com/nar/article/16/suppl/1/75/2358536> by guest on 20 April 2024

Secondary Structure of chloroplast 23S Ribosomal RNA: 3'half

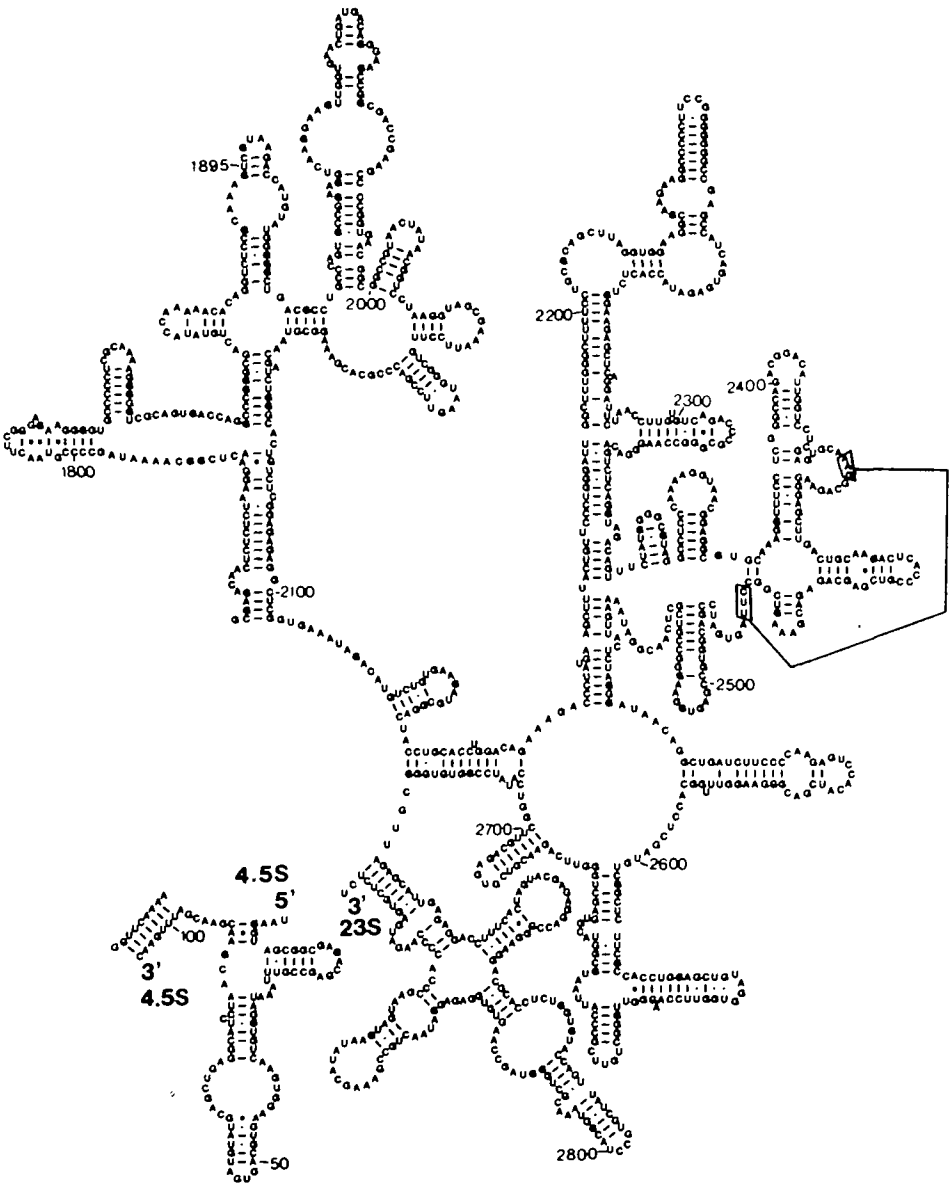

Fig.6b  
*Zea mays*

Secondary Structure of chloroplast 23S Ribosomal RNA: 5'half

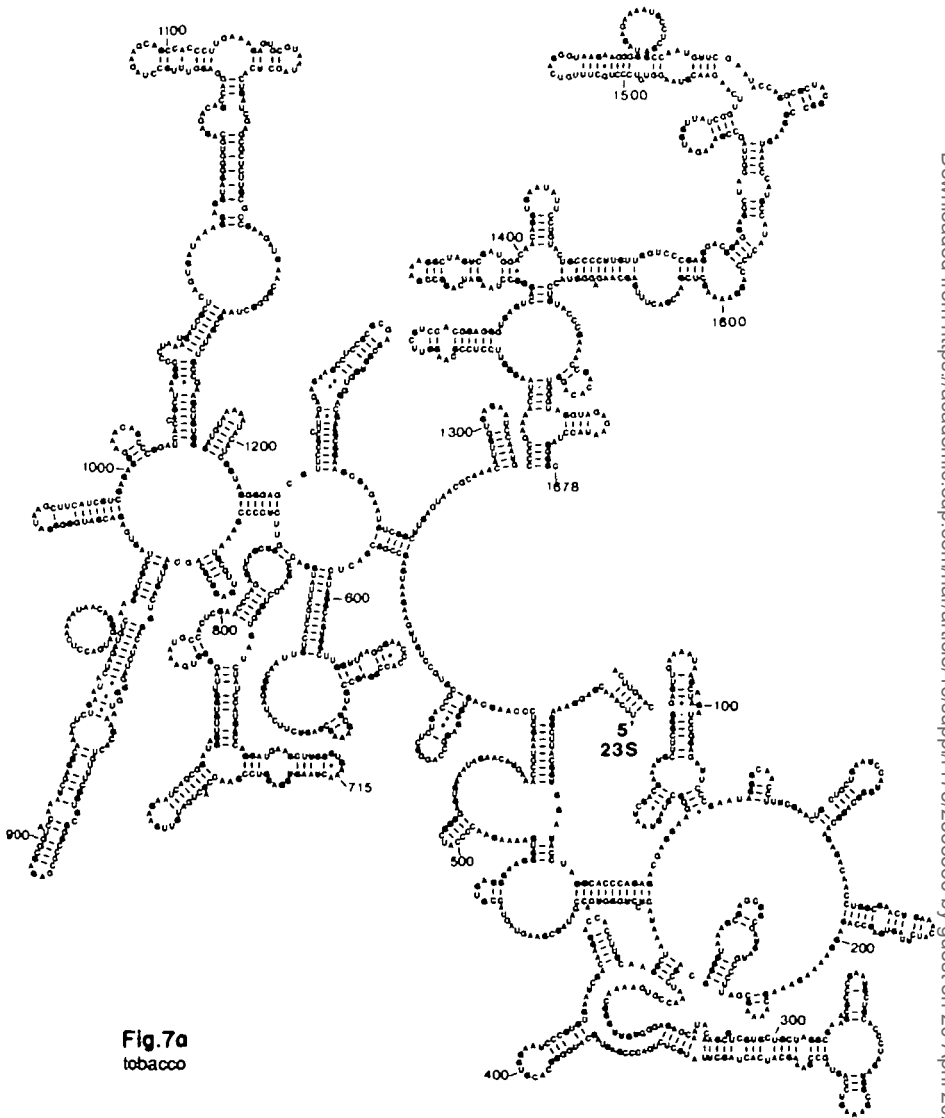

Fig.7a  
tobacco

Downloaded from <https://academic.oup.com/nar/article/16/suppl/1/75/2358536> by guest on 20 April 2024

Secondary Structure of chloroplast 23S Ribosomal RNA: 3'half

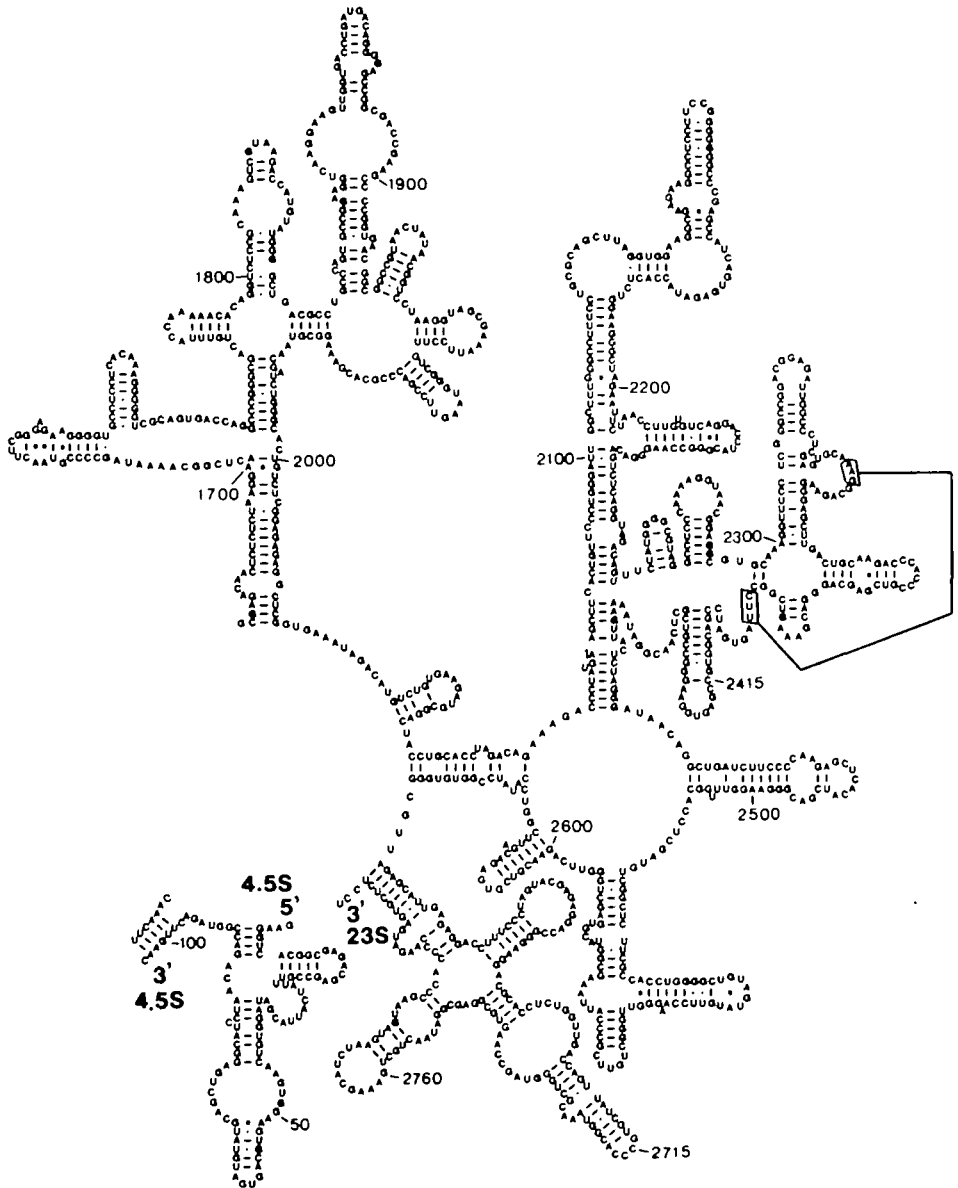

Fig. 7b  
tobacco

Secondary Structure of chloroplast 23S Ribosomal RNA: 5'half

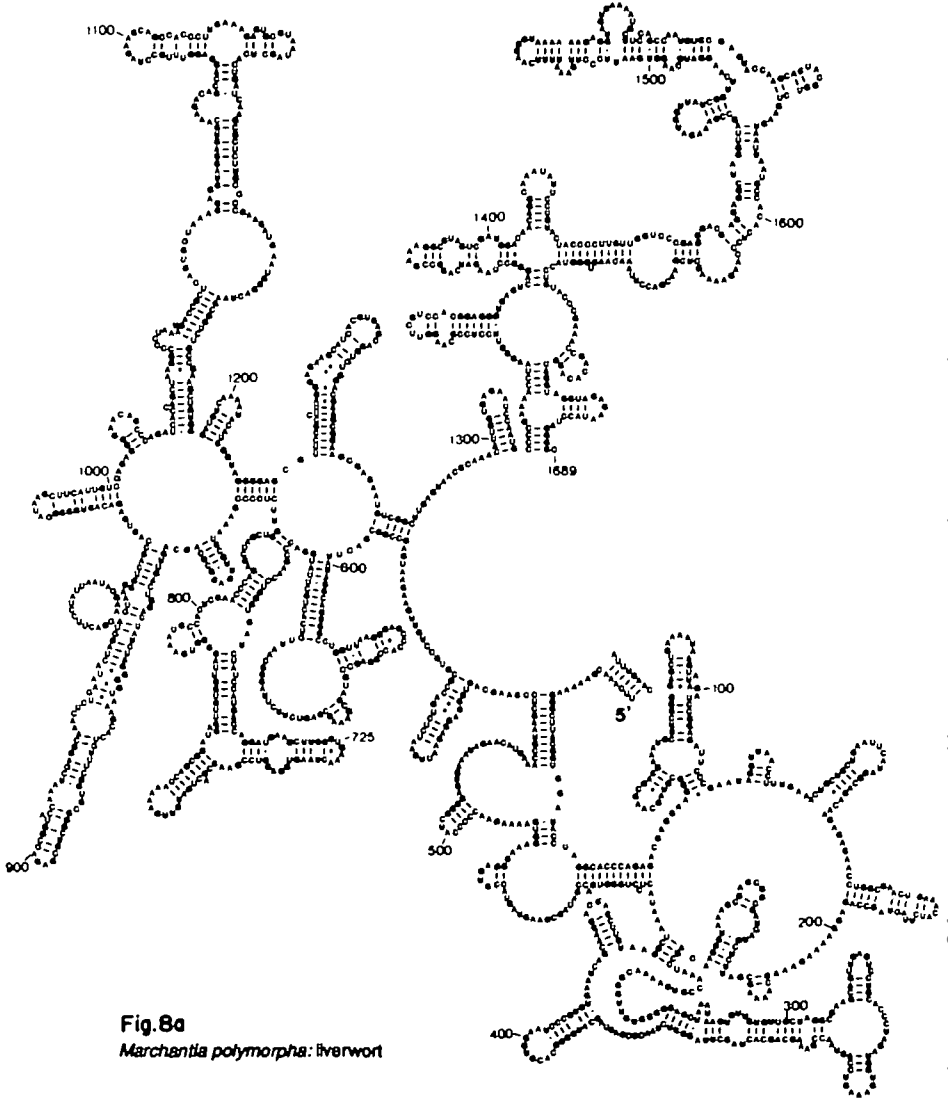

**Fig. 8a**  
*Marchantia polymorpha*: liverwort

Downloaded from <https://academic.oup.com/nar/article/16/suppl/1/75/2358536> by guest on 20 April 2024



Secondary Structure of chloroplast 23S Ribosomal RNA: 3'half

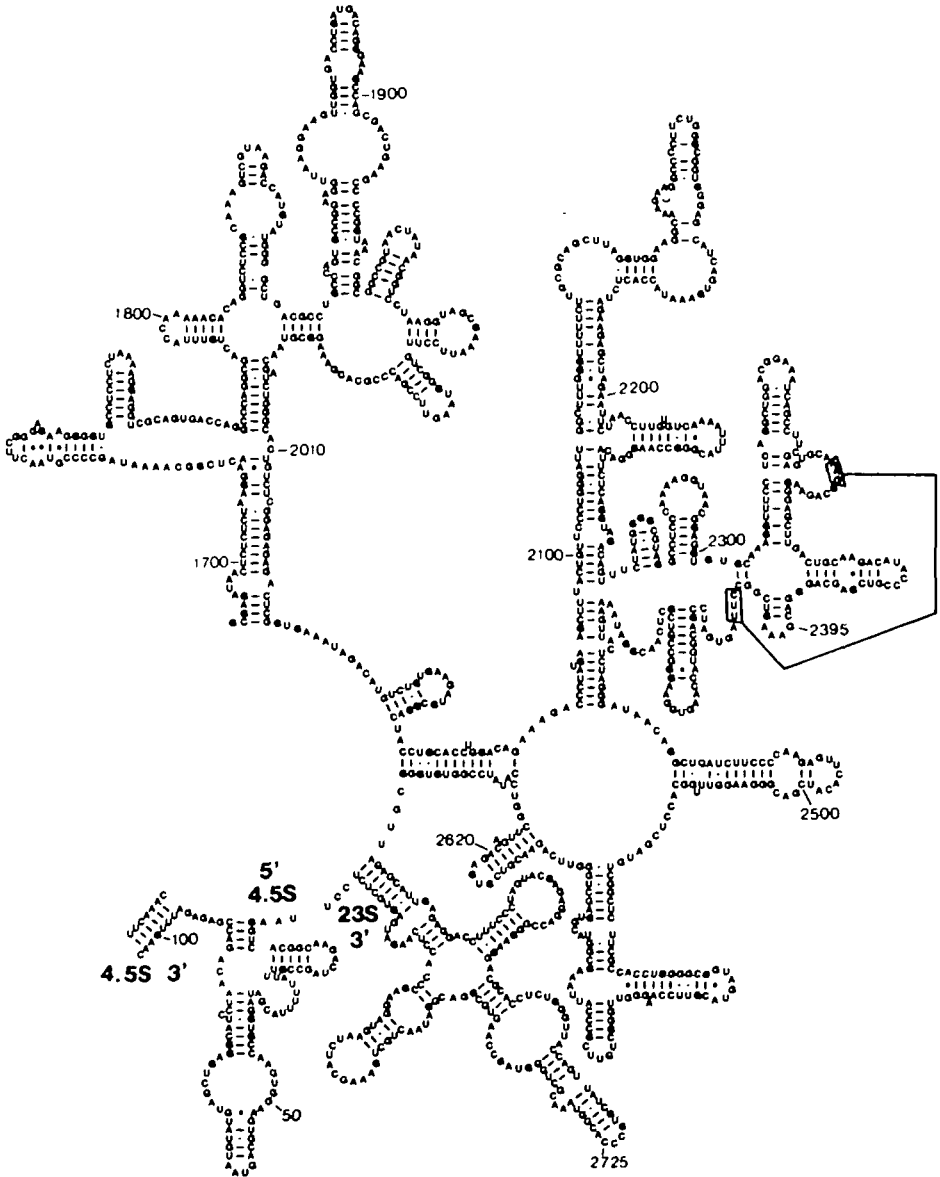

**Fig. 8b**  
*Marchantia polymorpha*: liverwort

Downloaded from <https://academic.oup.com/nar/article/16/suppl/1/75/2358536> by guest on 20 April 2024

Secondary Structure of chloroplast 23S Ribosomal RNA: 5'half

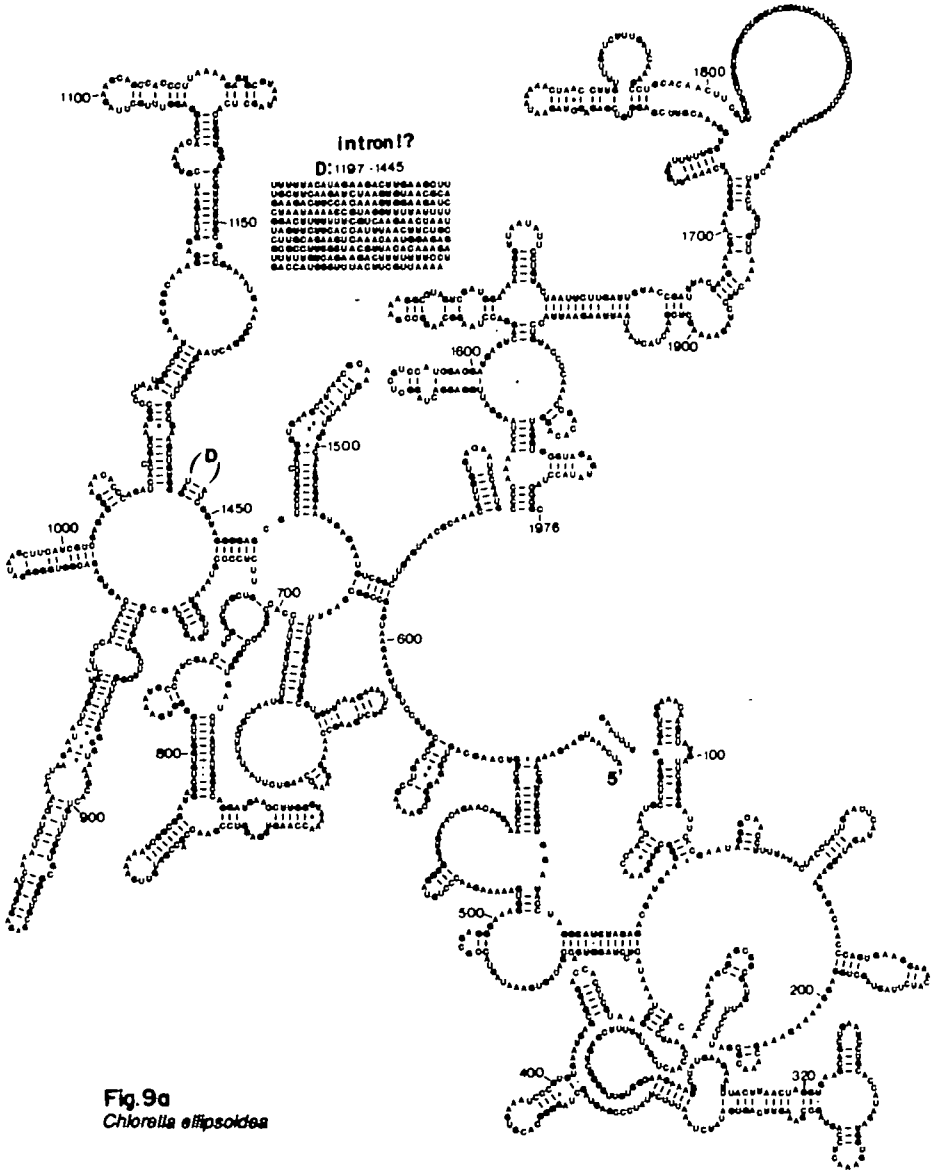

Downloaded from <https://academic.oup.com/nar/article/16/suppl/1/75/2358536> by guest on 20 April 2024

## Secondary Structure of chloroplast 23S Ribosomal RNA: 3'half

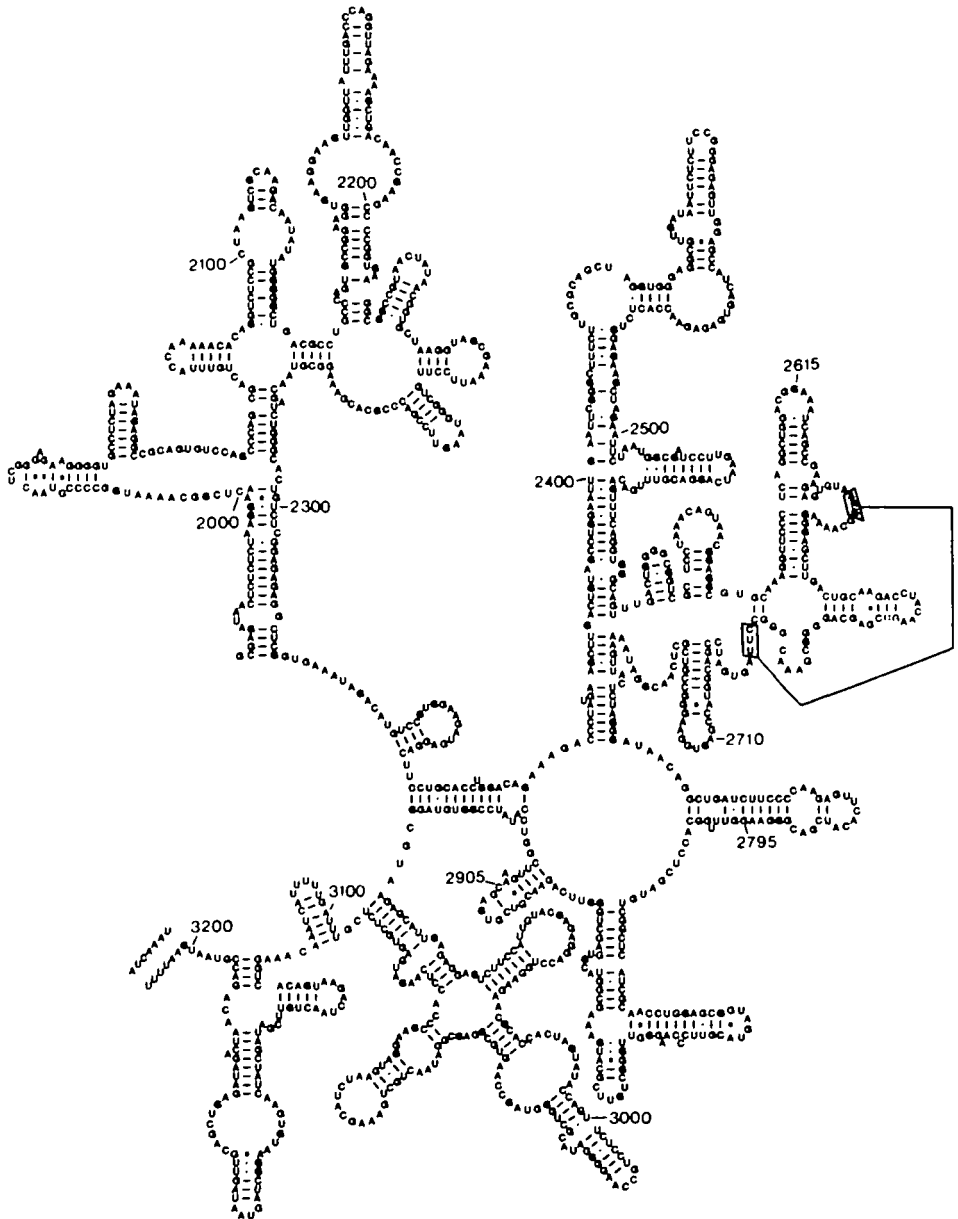

**Fig. 9b**  
*Chlorella ellipsoidea*

Secondary Structure of mitochondrial 23S Ribosomal RNA: 5'half

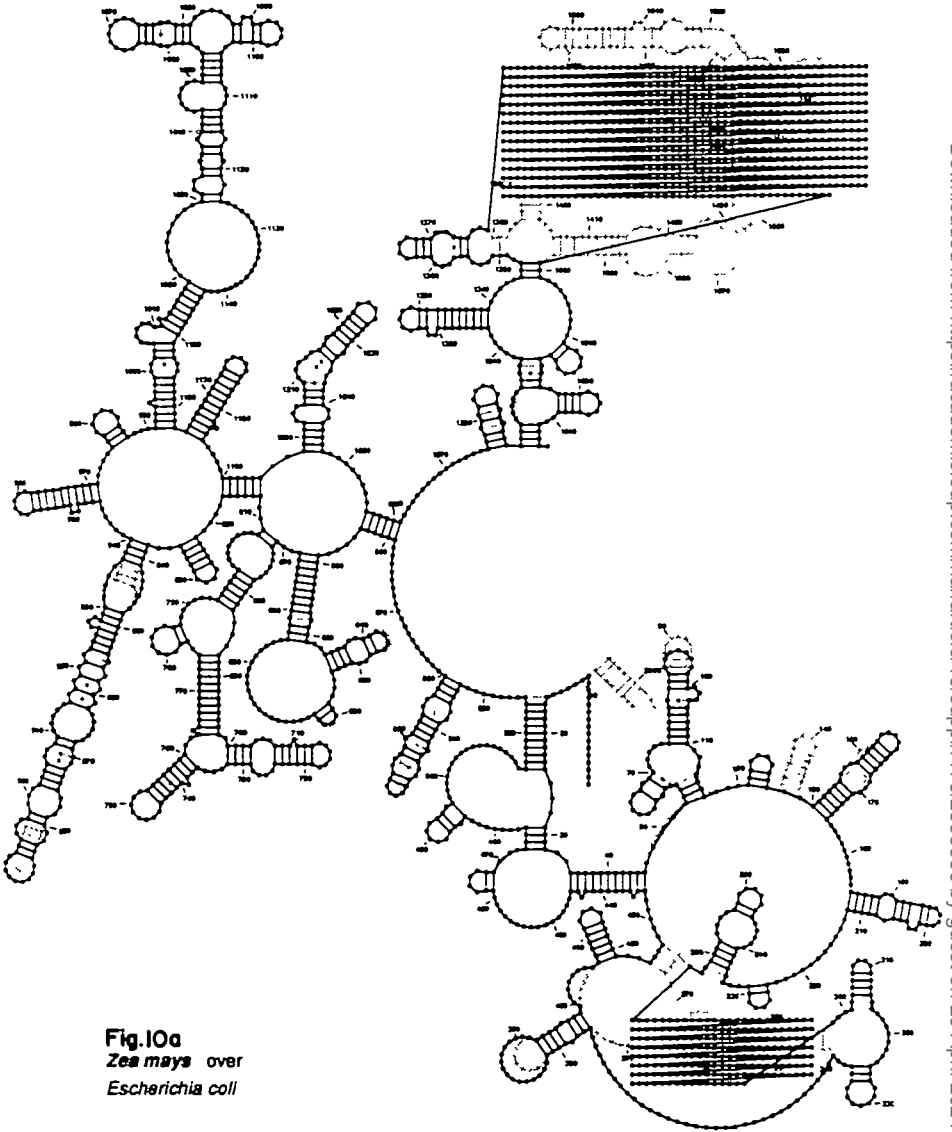

Downloaded from <https://academic.oup.com/nar/article/16/suppl/1/75/2358536> by guest on 20 April 2024

Secondary Structure of mitochondrial 23S Ribosomal RNA: 3' half

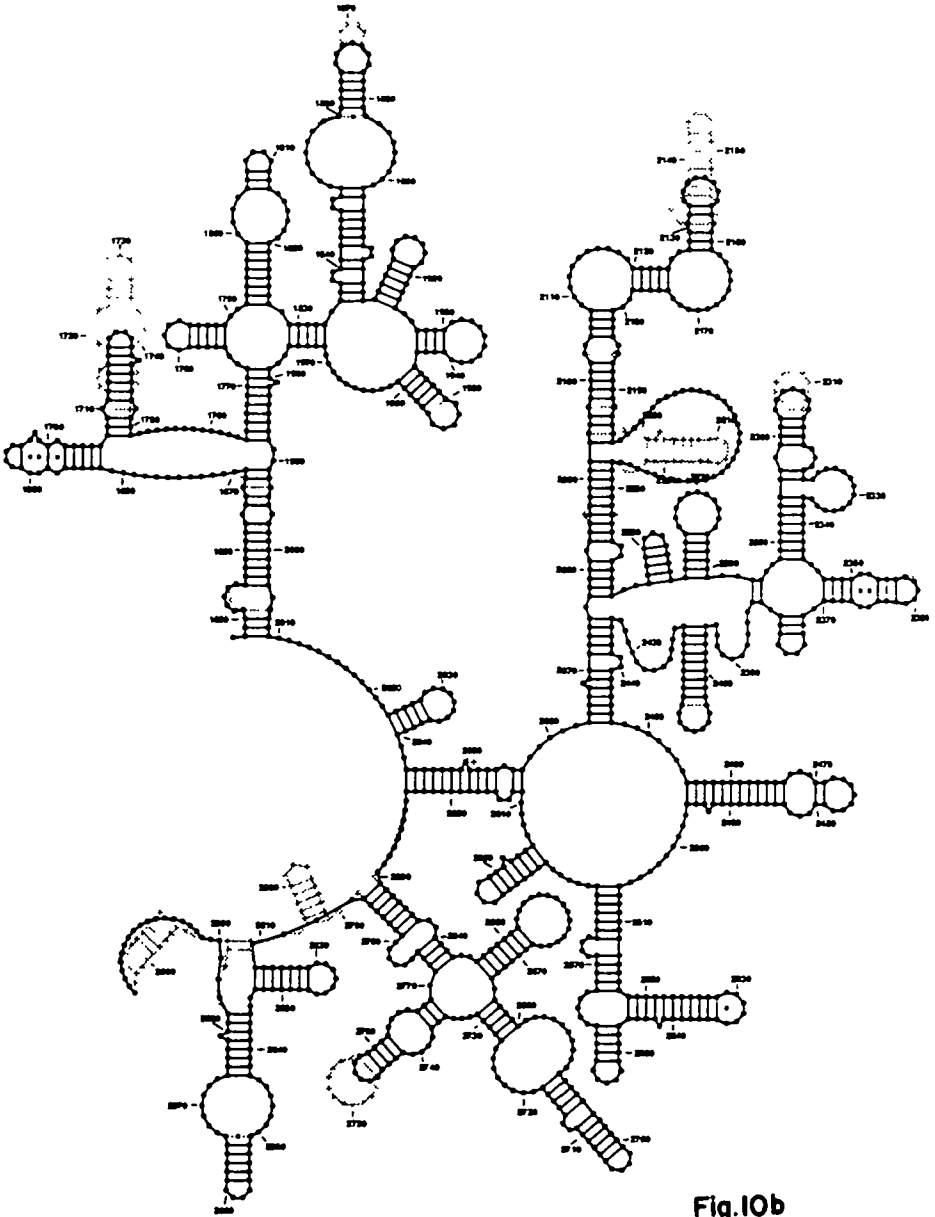

**Fig. 10b**  
*Zea mays* over  
*Escherichia coli*

Secondary Structure of mitochondrial 23S Ribosomal RNA: 5'half

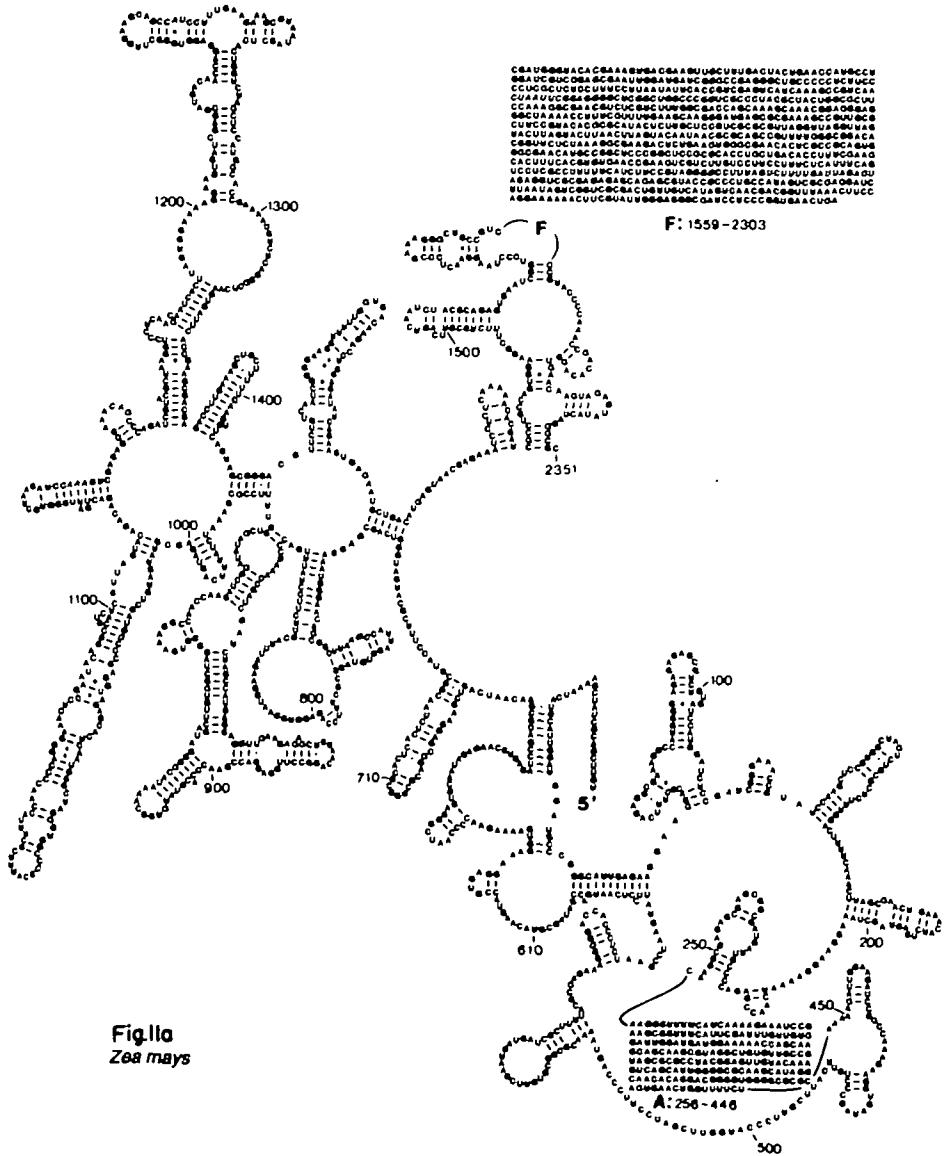

Figlio  
*Zea mays*

Downloaded from https://academic.oup.com/nar/article/16/suppl/1/75/2358536 by guest on 20 April 2024

Secondary Structure of mitochondrial 23S Ribosomal RNA: 3'half

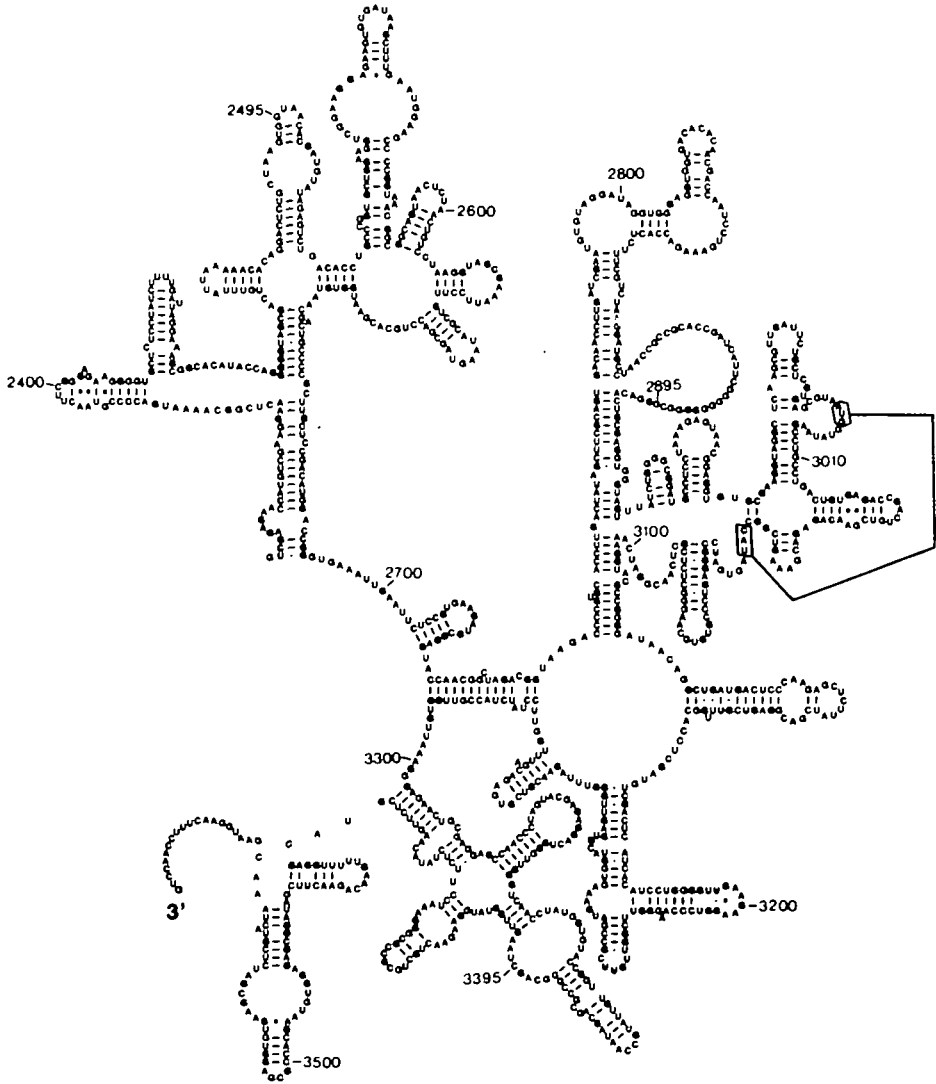

Fig.11b  
*Zea mays*

Secondary Structure of mitochondrial 23S Ribosomal RNA: 5'half

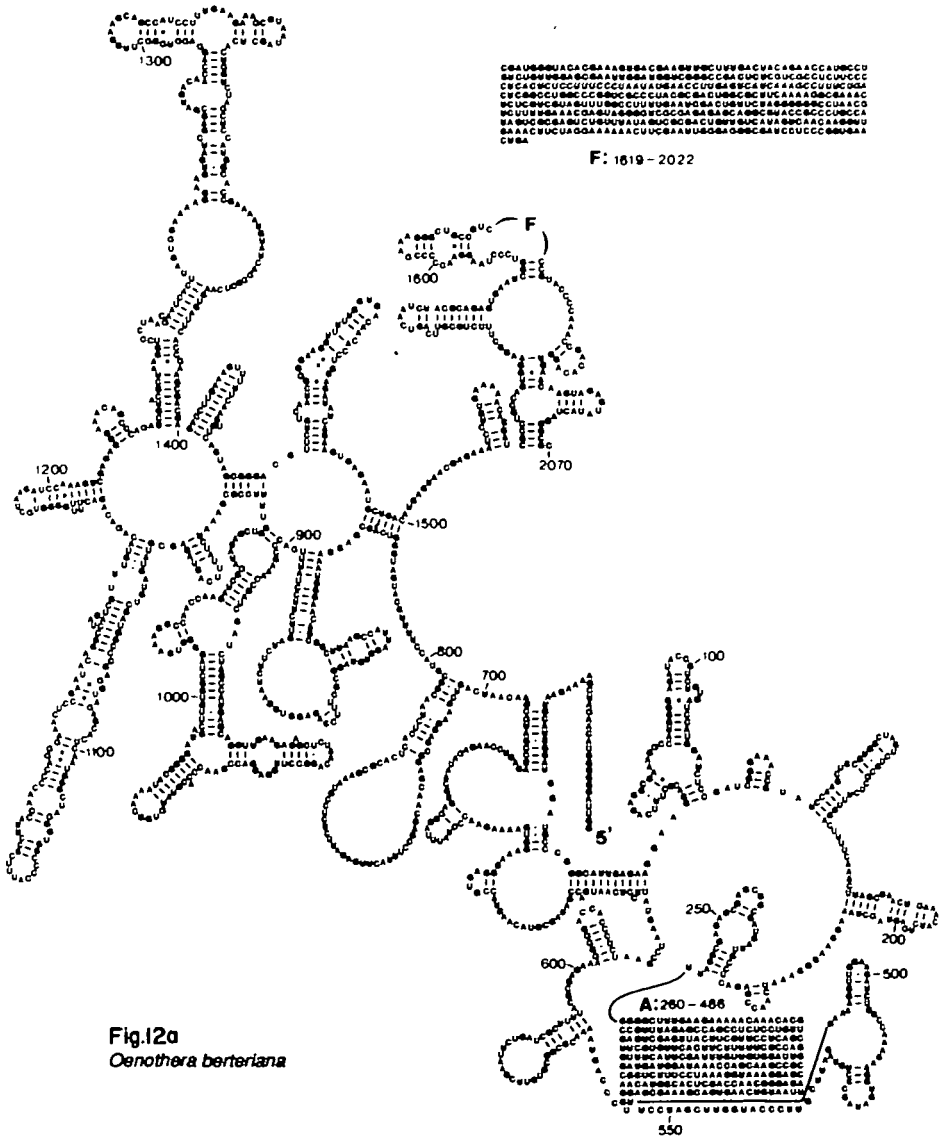

Fig.12a  
*Oenothera biennis*

Downloaded from [https://academic.oup.com/nar/article/16/suppl\\_1/751/2358536](https://academic.oup.com/nar/article/16/suppl_1/751/2358536) by guest on 20 April 2024



Secondary Structure of mitochondrial 23S Ribosomal RNA: 3'half

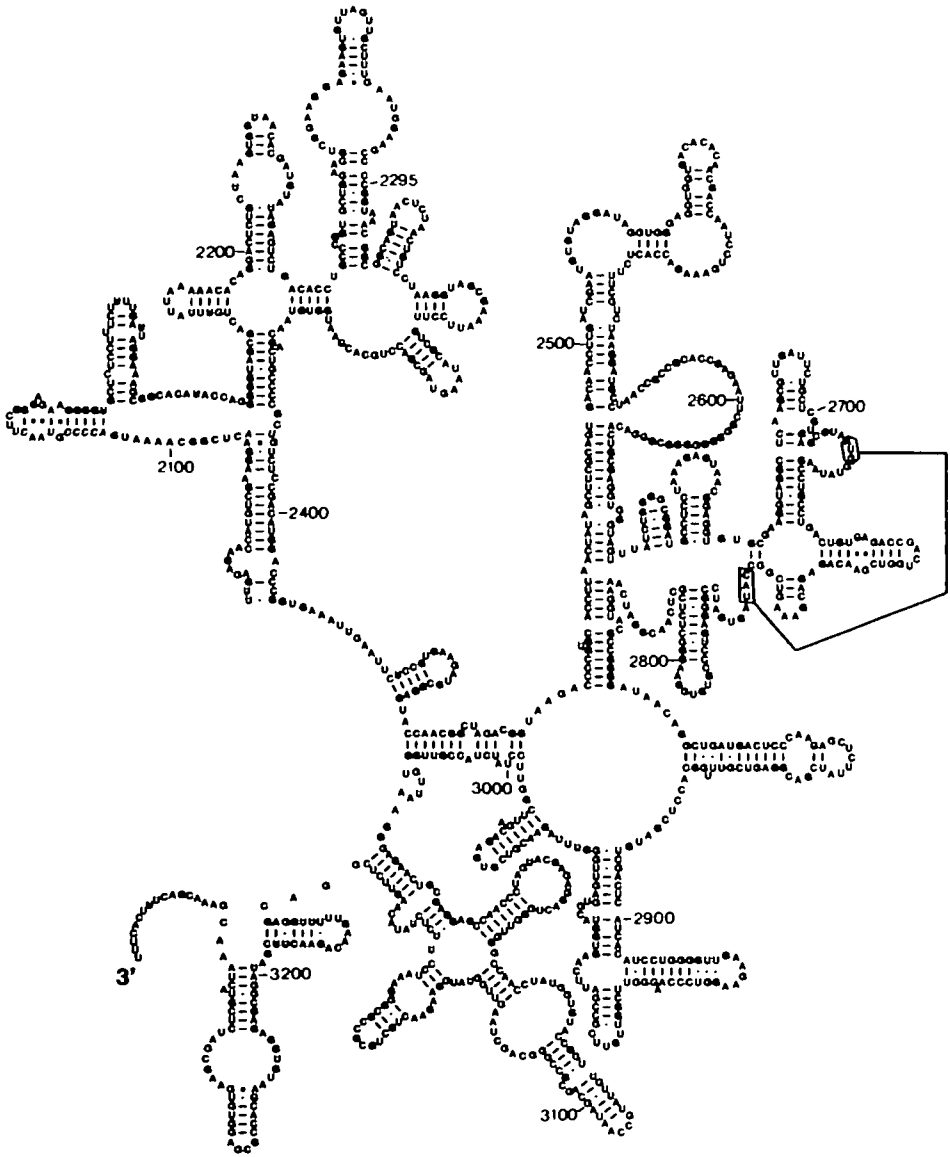

Fig.12b  
*Oenothera berteriana*

Secondary Structure of mitochondrial 23S Ribosomal RNA: 5'half

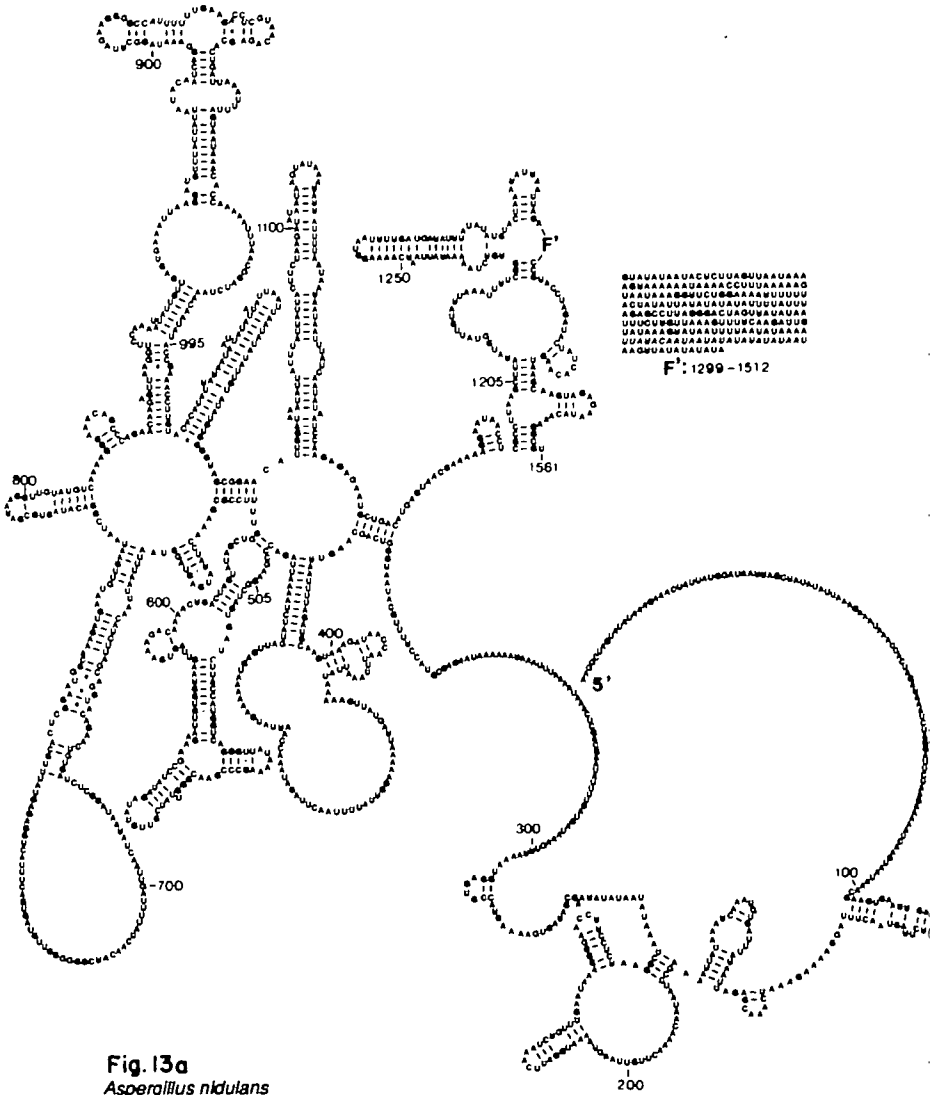

Fig. 13a  
*Aspergillus nidulans*

Downloaded from <https://academic.oup.com/nar/article/16/suppl/1/75/2358536> by guest on 20 April 2024

Secondary Structure of mitochondrial 23S Ribosomal RNA: 3'half

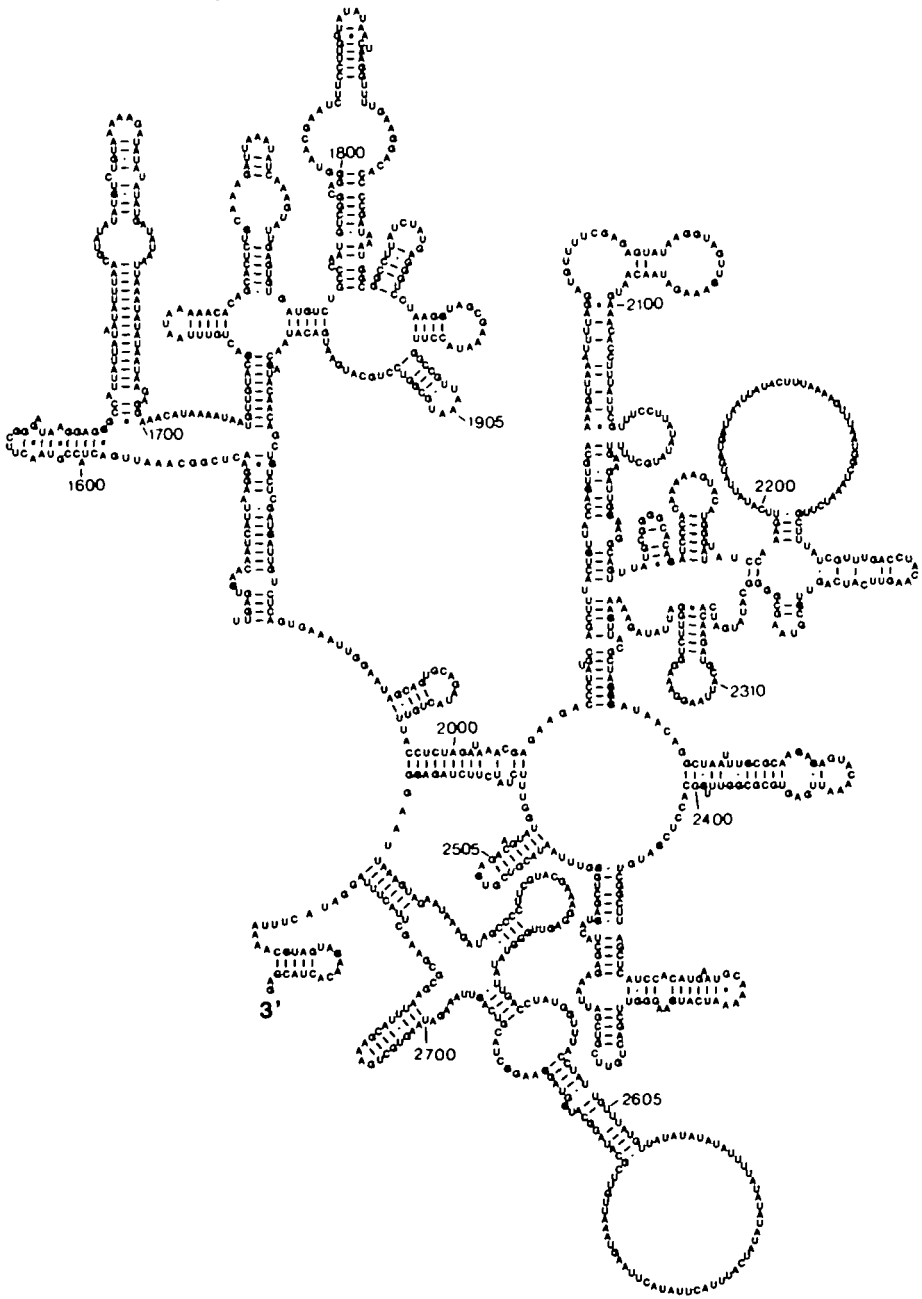

*Aspergillus nidulans*

Fig. 13b





Secondary Structure of mitochondrial 23S Ribosomal RNA: 5'half

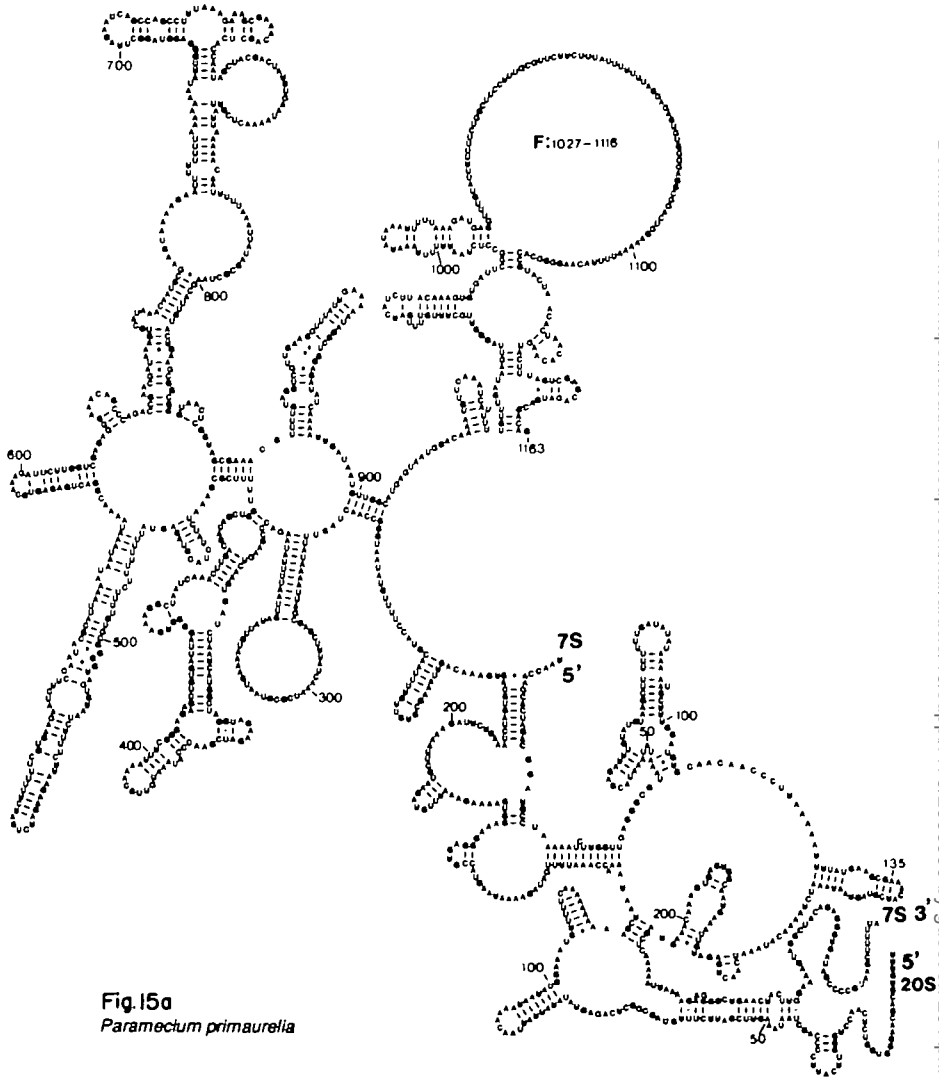

Fig.15a  
*Paramecium primaurelia*

Downloaded from [https://academic.oup.com/nar/article/16/suppl\\_1/75/2358536](https://academic.oup.com/nar/article/16/suppl_1/75/2358536) by guest on 20 April 2024

Secondary Structure of mitochondrial 23S Ribosomal RNA: 3'half

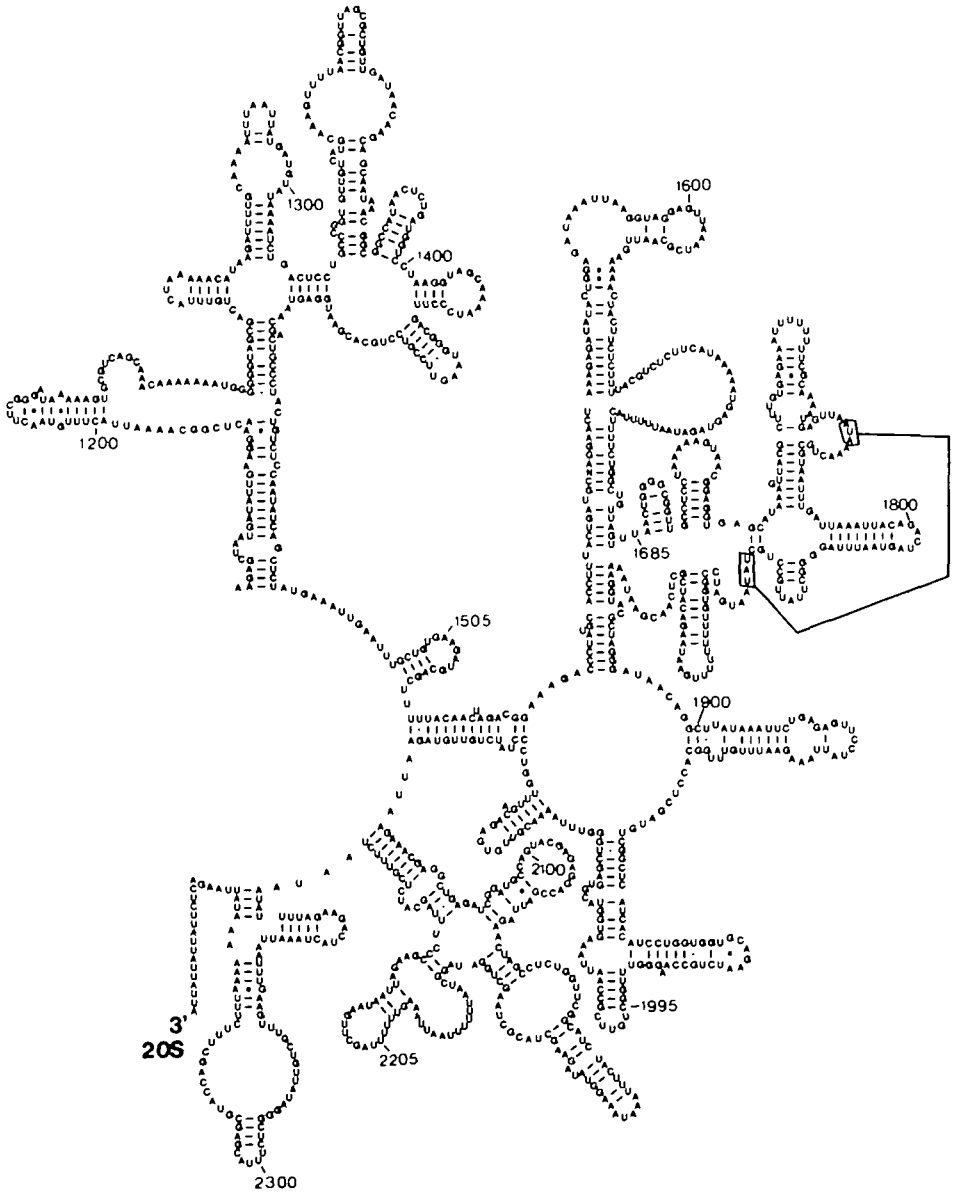

**Fig.15b**  
*Parametium primaurelia*

Secondary Structure of mitochondrial 23S Ribosomal RNA: 5'half

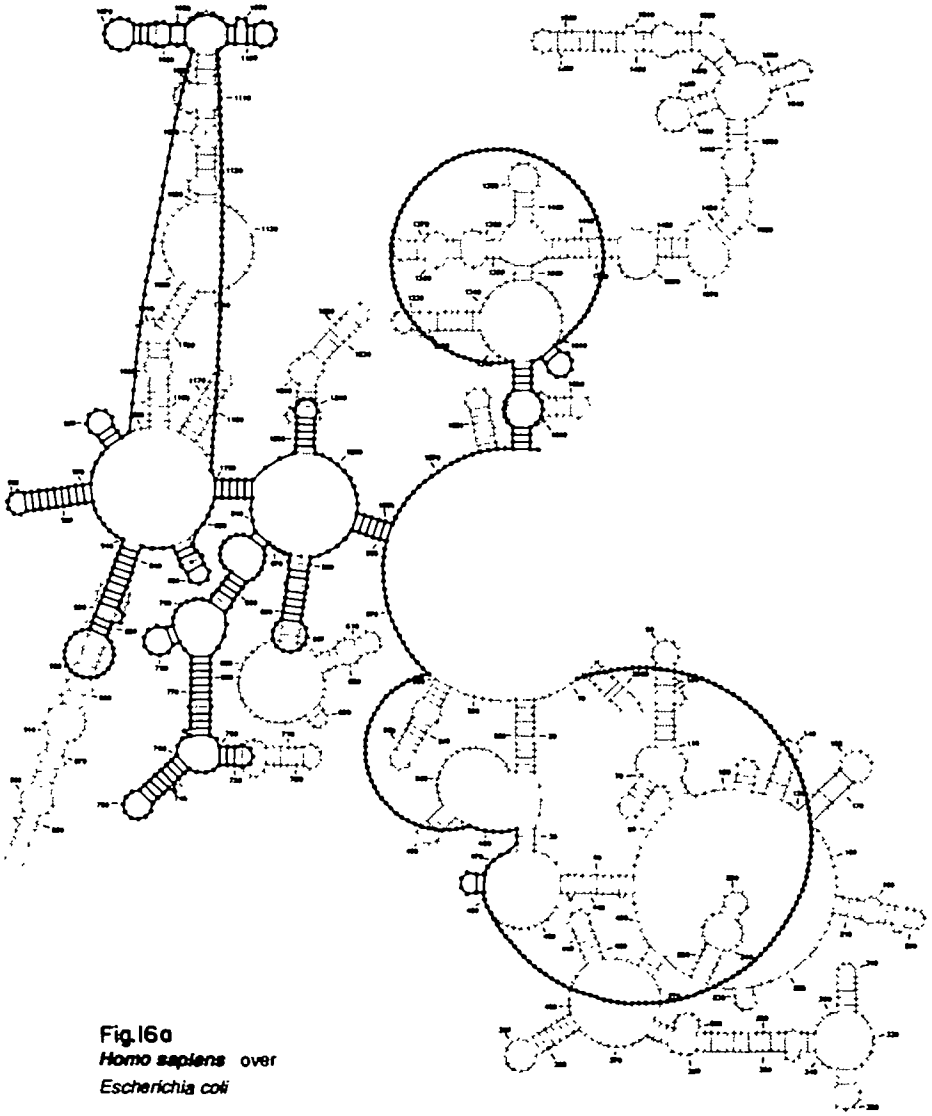

**Fig.16a**  
*Homo sapiens* over  
*Escherichia coli*



Secondary Structure of mitochondrial 23S Ribosomal RNA: 3'half

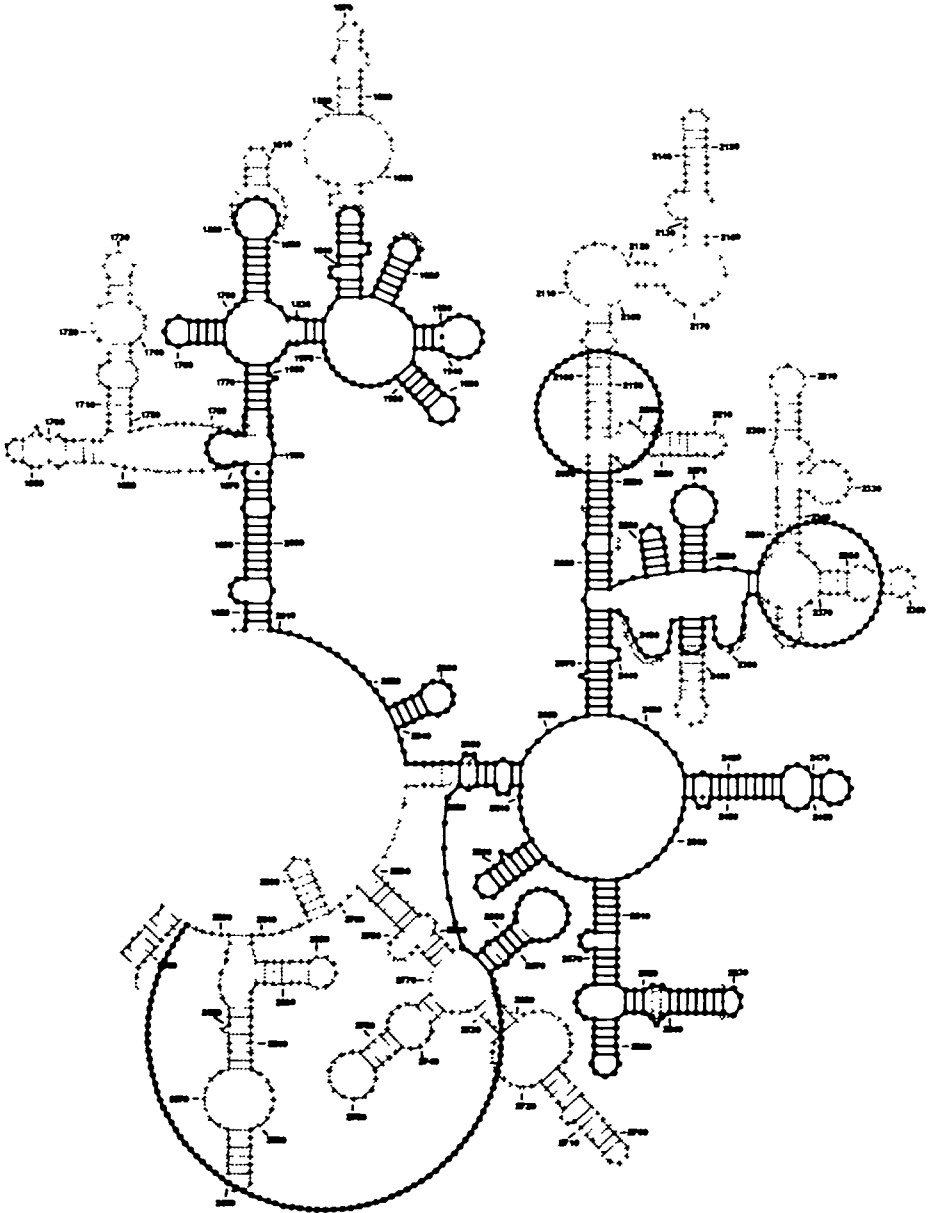

**Fig.16b**  
*Homo sapiens* over  
*Escherichia coli*



Secondary Structure of mitochondrial 23S Ribosomal RNA: 3'half

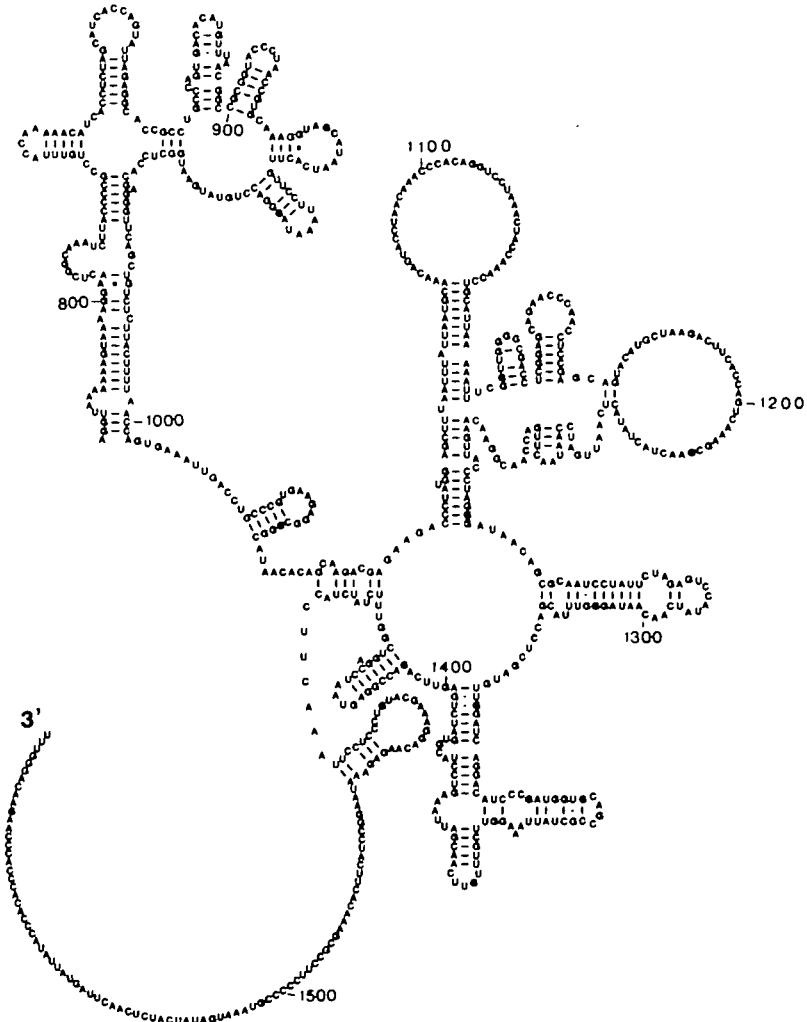

Fig.17b  
*Homo sapiens*



Secondary Structure of mitochondrial 23S Ribosomal RNA: 3'half

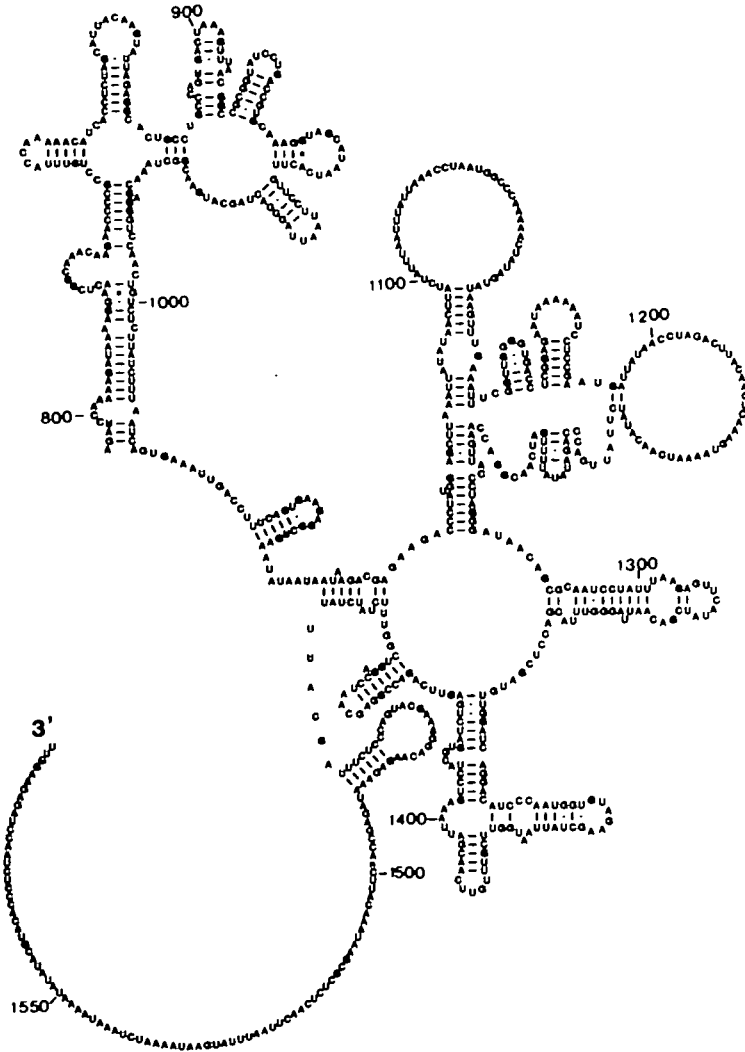

Fig.18b  
Mouse

Secondary Structure of mitochondrial 23S Ribosomal RNA: 5'half

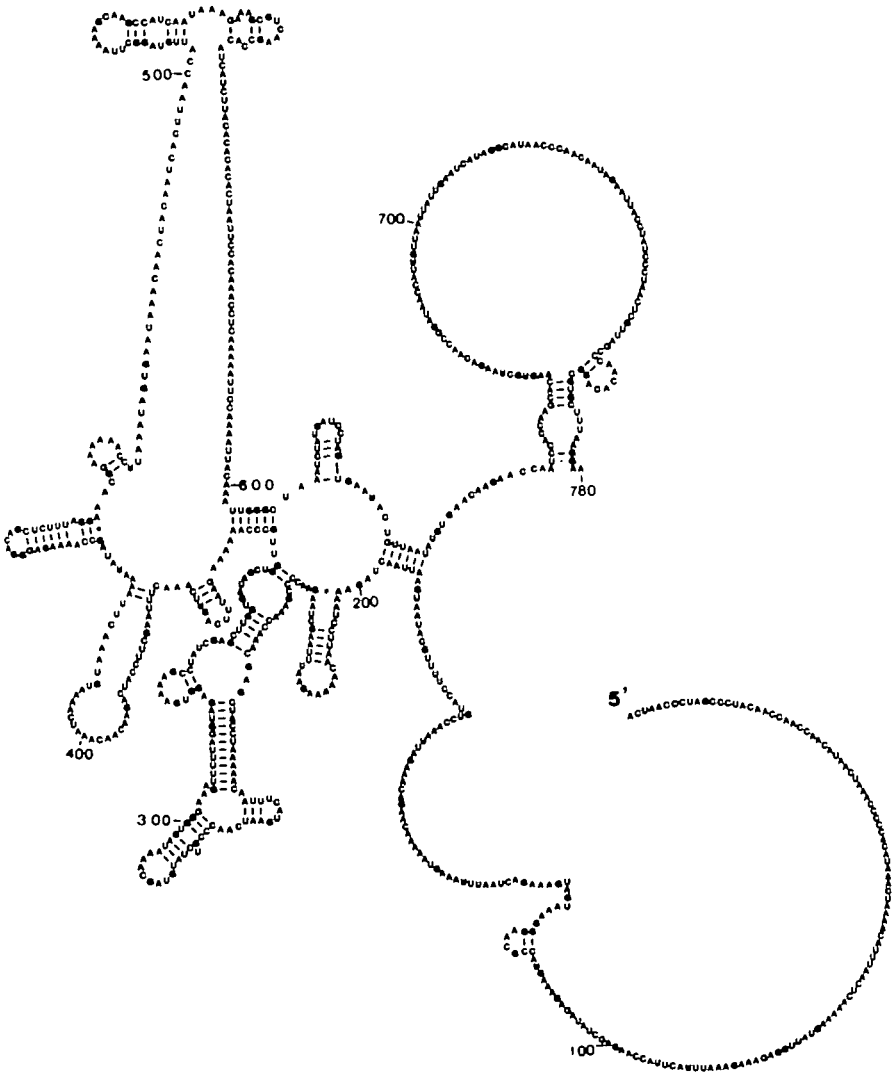

Fig.19a  
Rat

Secondary Structure of mitochondrial 23S Ribosomal RNA: 3'half

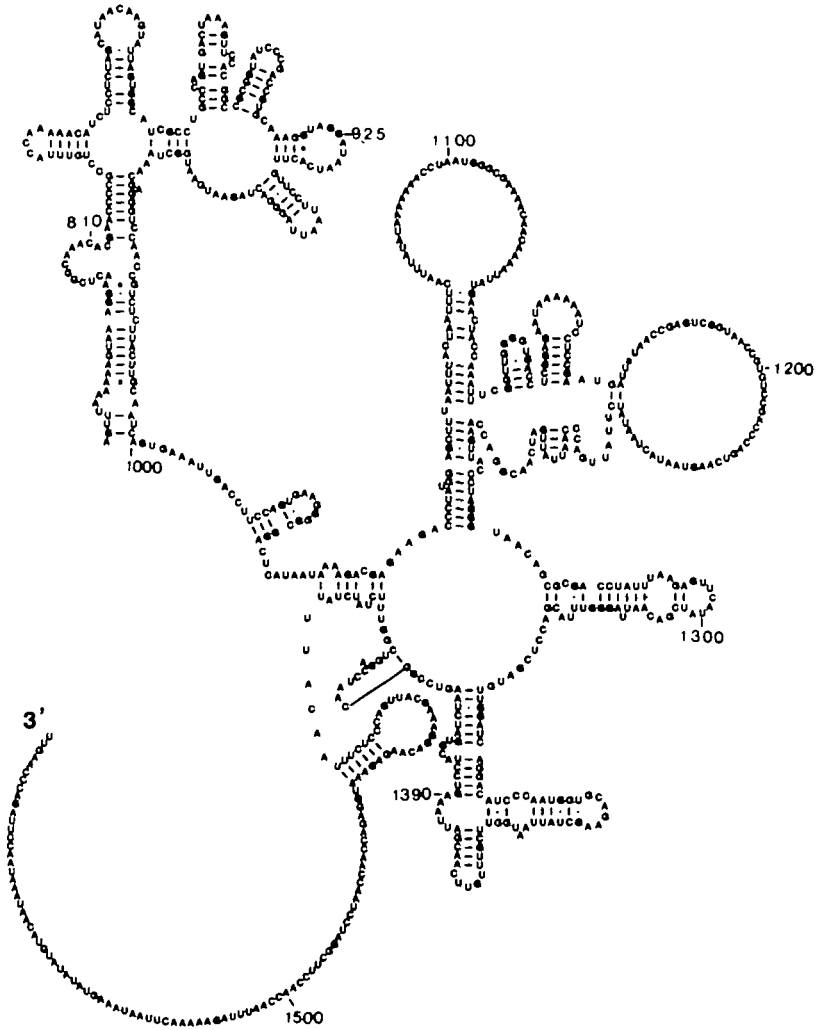

Fig.19b  
Rat

Downloaded from https://academic.oup.com/nar/article/11/6/suppl/1/75/2358536 by guest on 20 April 2024

Secondary Structure of mitochondrial 23S Ribosomal RNA: 5' half

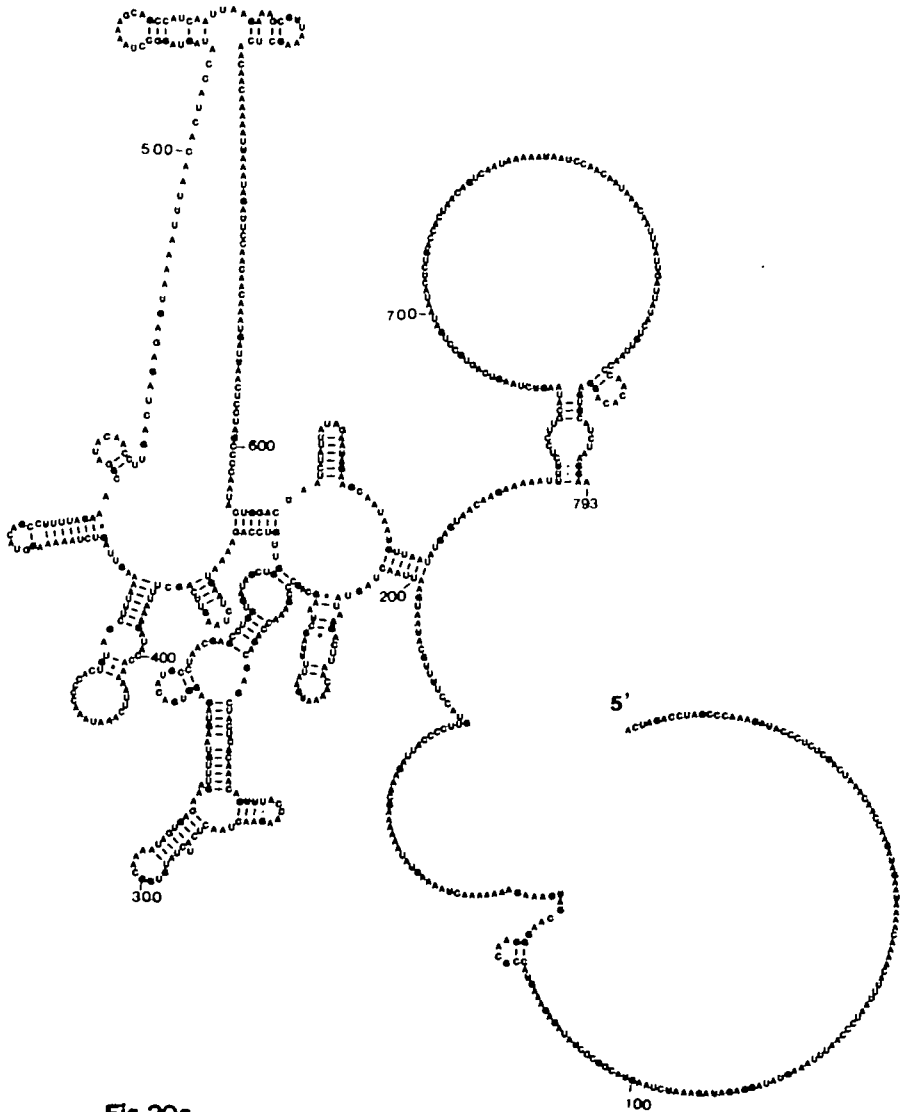

**Fig. 20a**  
*Bovine*



Secondary Structure of mitochondrial 23S Ribosomal RNA: 3'half

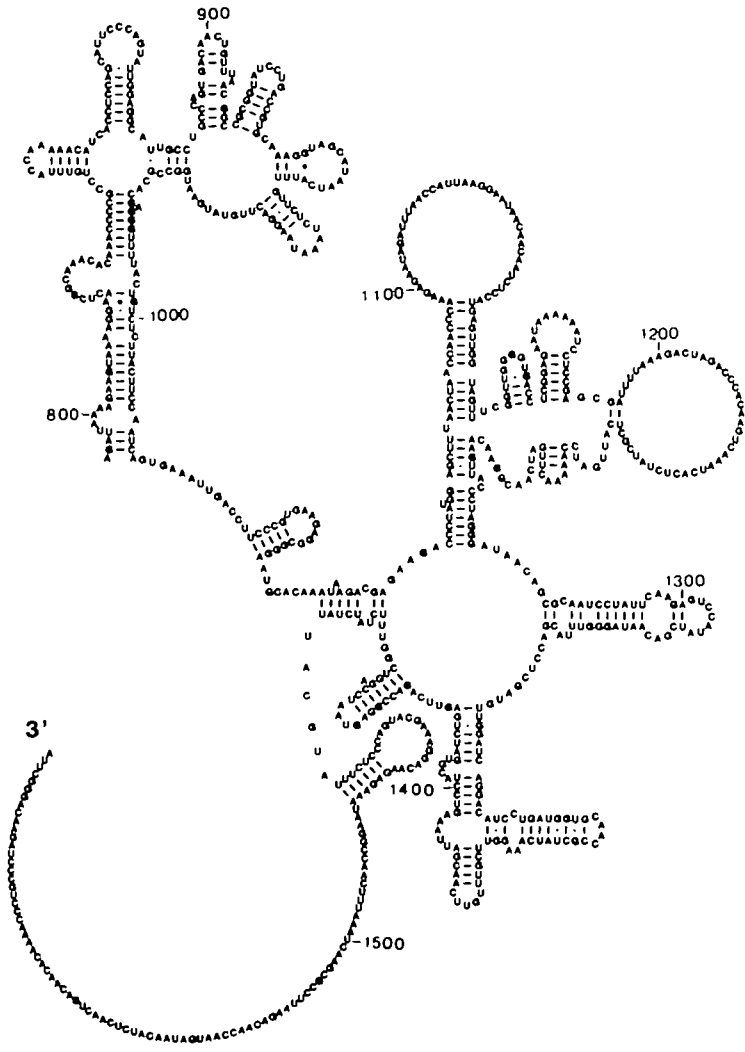

Fig. 20b  
Bovine

Downloaded from <https://academic.oup.com/nar/article/1/6/suppl/1/75/2358536> by guest on 20 April 2024

Secondary Structure of mitochondrial 23S Ribosomal RNA: 5' half

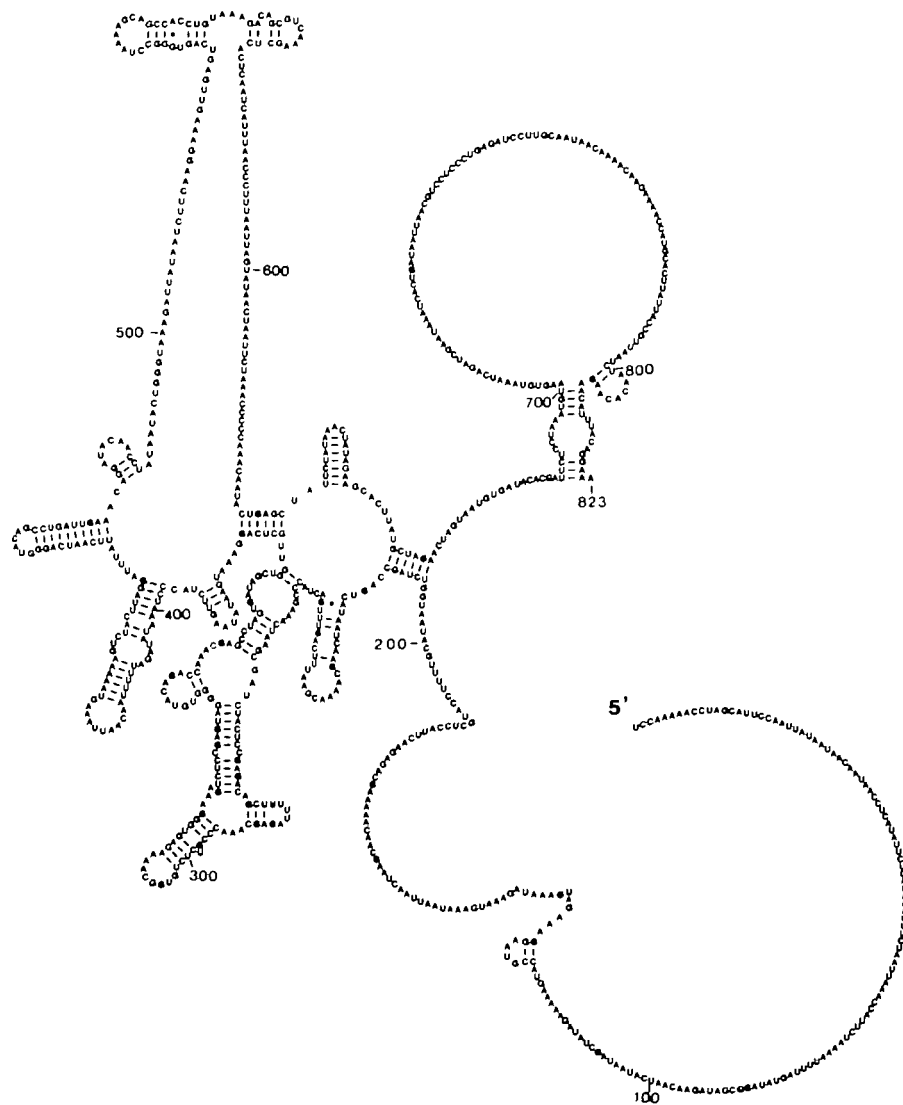

Fig.21a  
*Xenopus laevis*

Secondary Structure of mitochondrial 23S Ribosomal RNA: 3'half

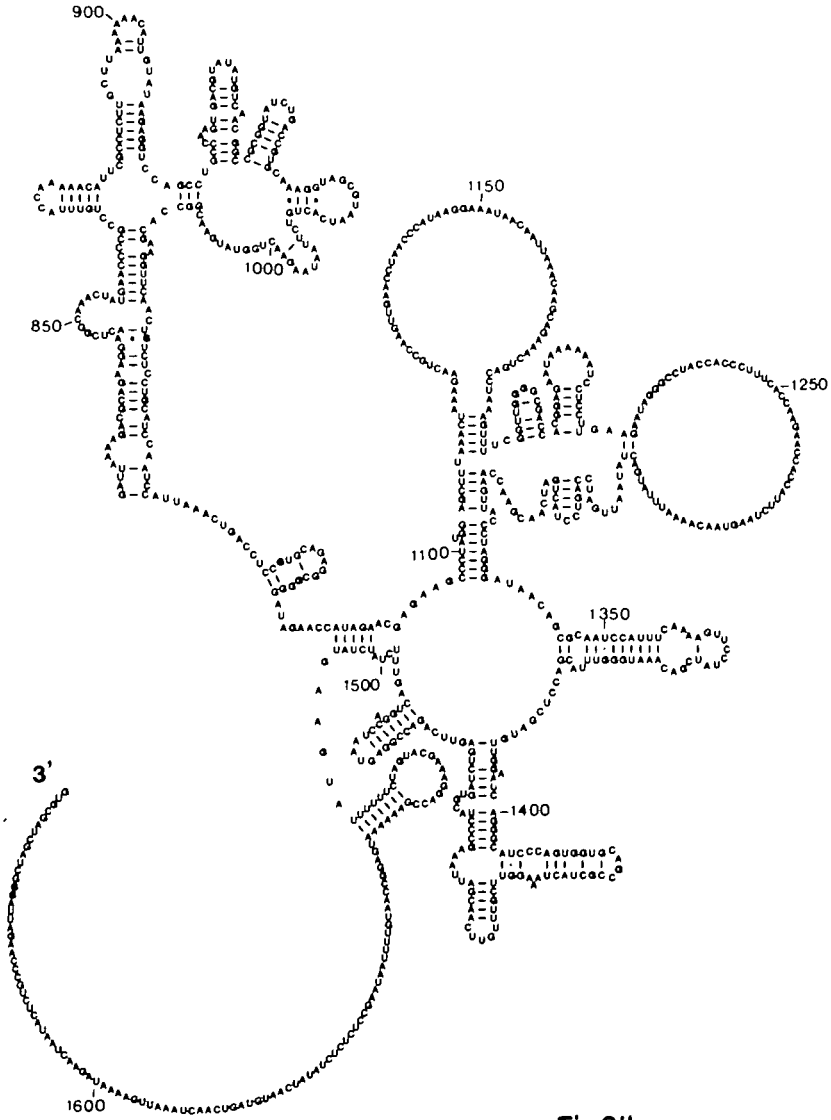

**Fig.21b**  
*Xenopus laevis*

Secondary Structure of mitochondrial 23S Ribosomal RNA: 3'half

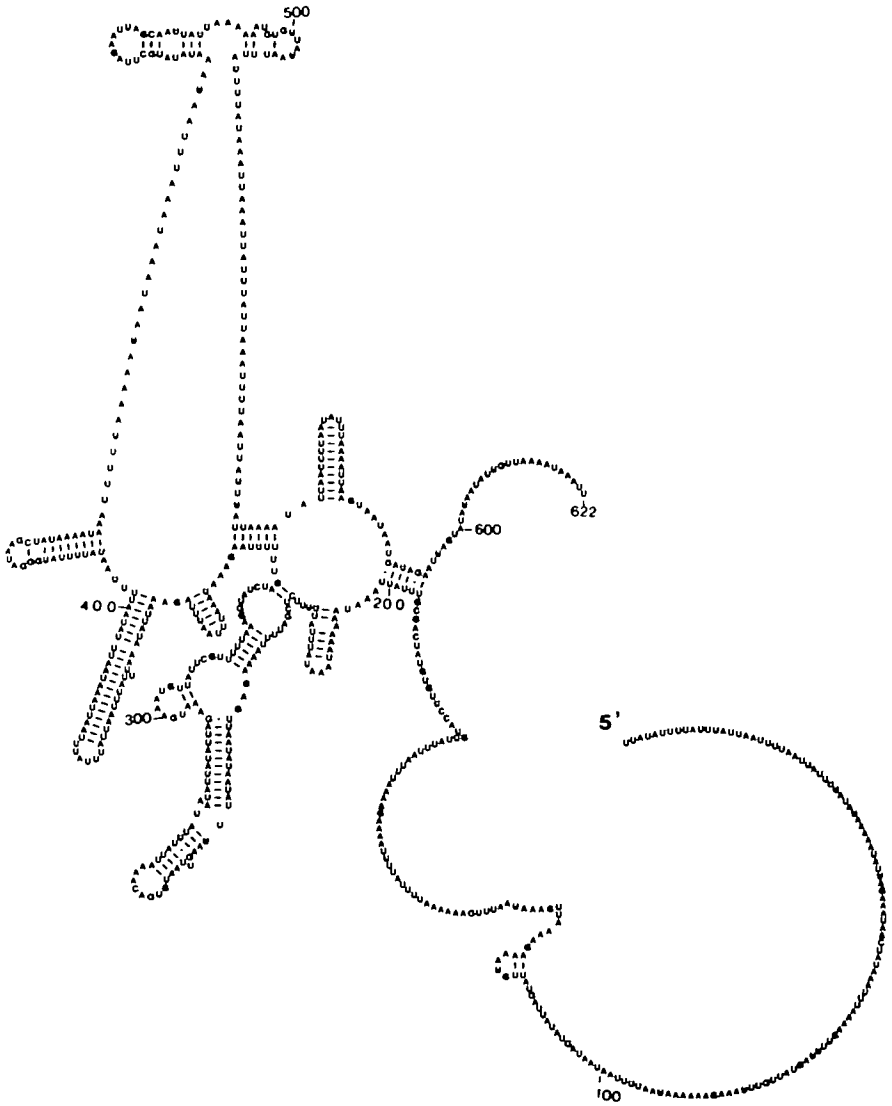

Fig.22a  
*Drosophila yakuba*

Downloaded from <https://academic.oup.com/nar/article/16/suppl/1/75/2358536> by guest on 20 April 2024

Secondary Structure of mitochondrial 23S Ribosomal RNA: 3'half

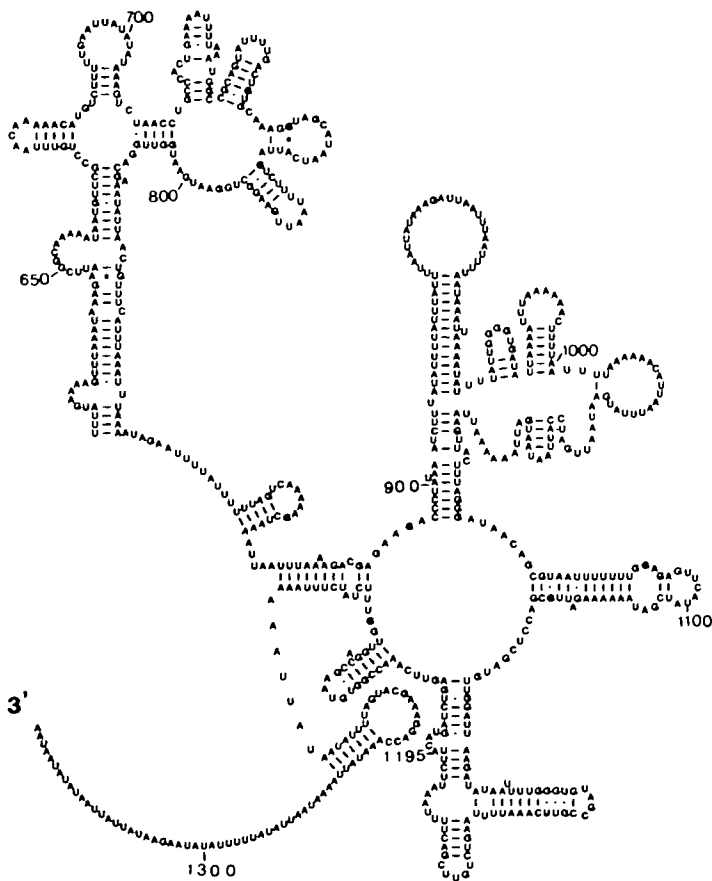

Fig.22b  
*Drosophila yakuba*

Secondary Structure of mitochondrial 23S Ribosomal RNA: 5'half

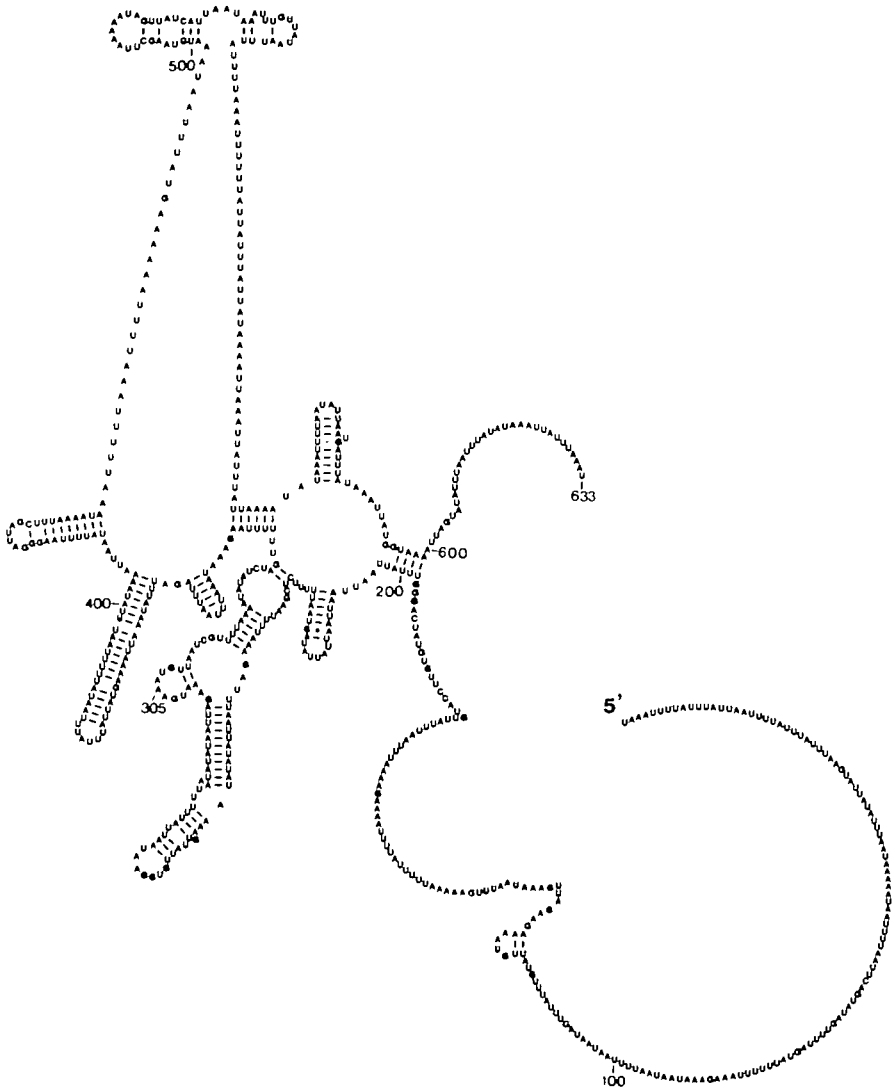

Fig.23a  
*Aedes albopictus*: mosquito

Secondary Structure of mitochondrial 23S Ribosomal RNA: 3' half

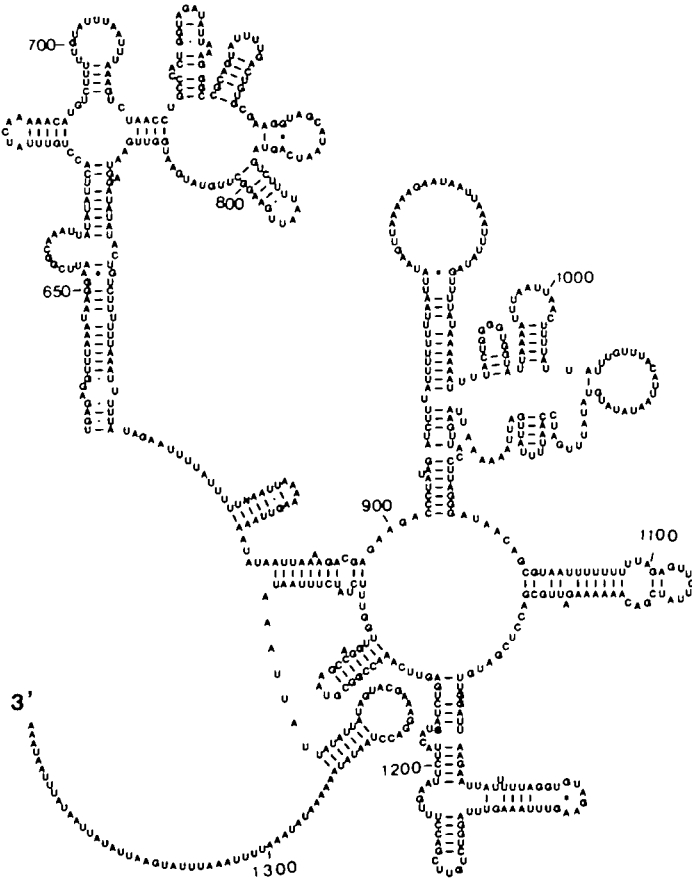

**Fig.23b**

*Aedes albopictus*: mosquito

Secondary Structure of mitochondrial 23S Ribosomal RNA: 5'half

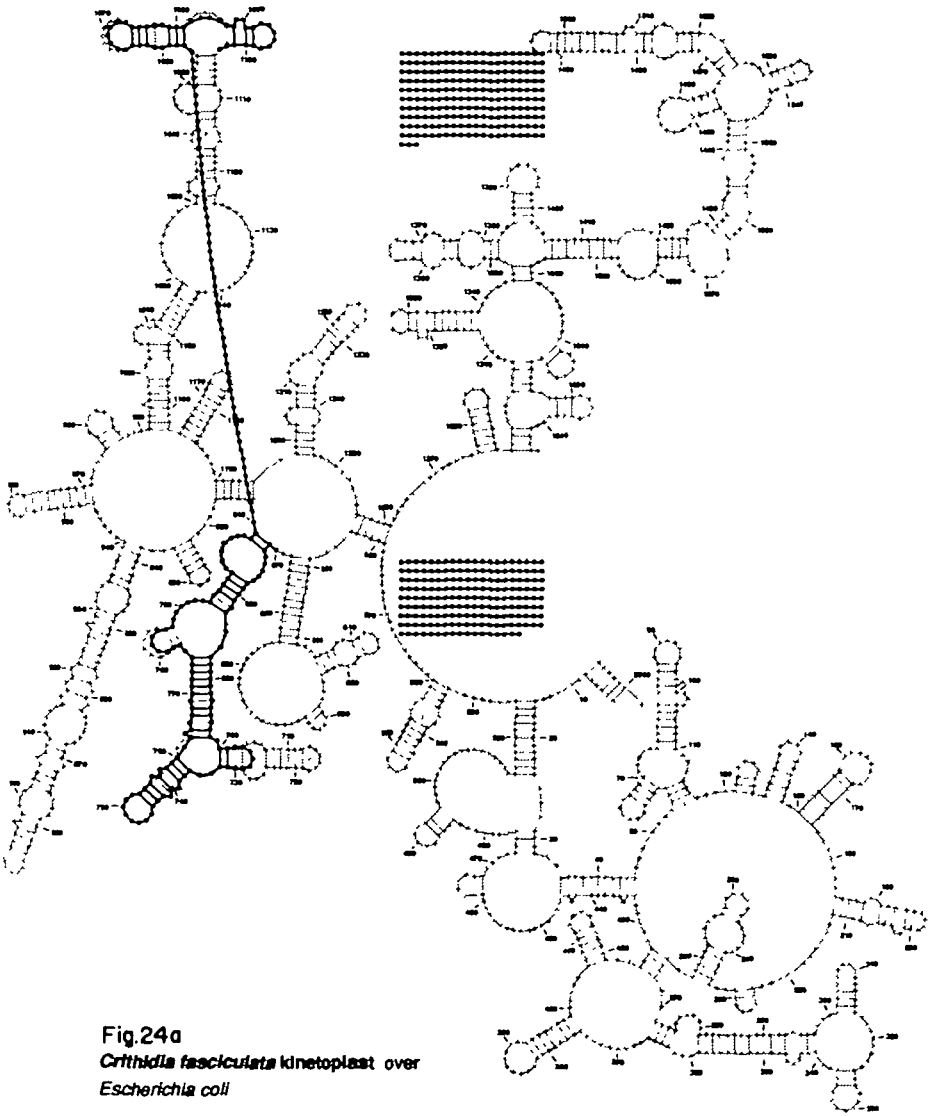

Fig.24a  
*Crithidia fasciculata* kinetoplast over  
*Escherichia coli*

Downloaded from <https://academic.oup.com/nar/article/16/suppl/1/75/2358536> by guest on 20 April 2024



Secondary Structure of mitochondrial 23S Ribosomal RNA: 3'half

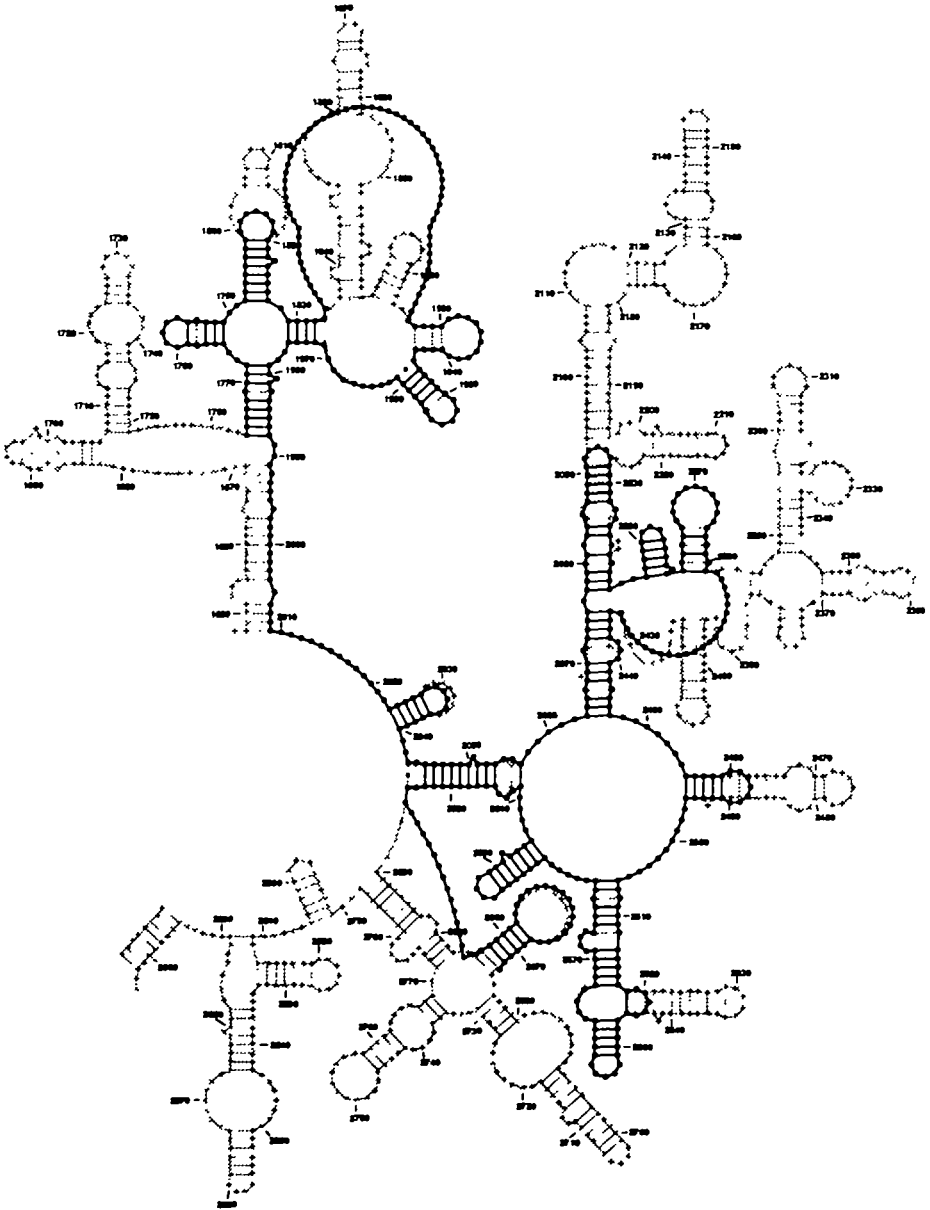

**Fig. 24b**  
*Crithidia fasciculata* kinetoplast over  
*Escherichia coli*



Secondary Structure of mitochondrial 23S Ribosomal RNA: 3'half

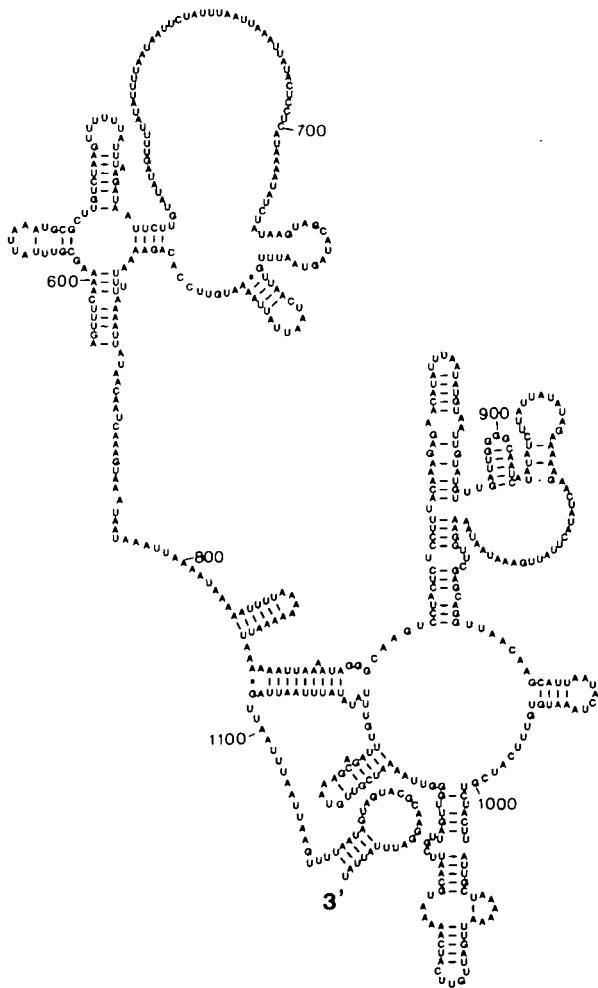

Fig.25b  
*Crithidia fasciculata*

Secondary Structure of mitochondrial 23S Ribosomal RNA: 5' half

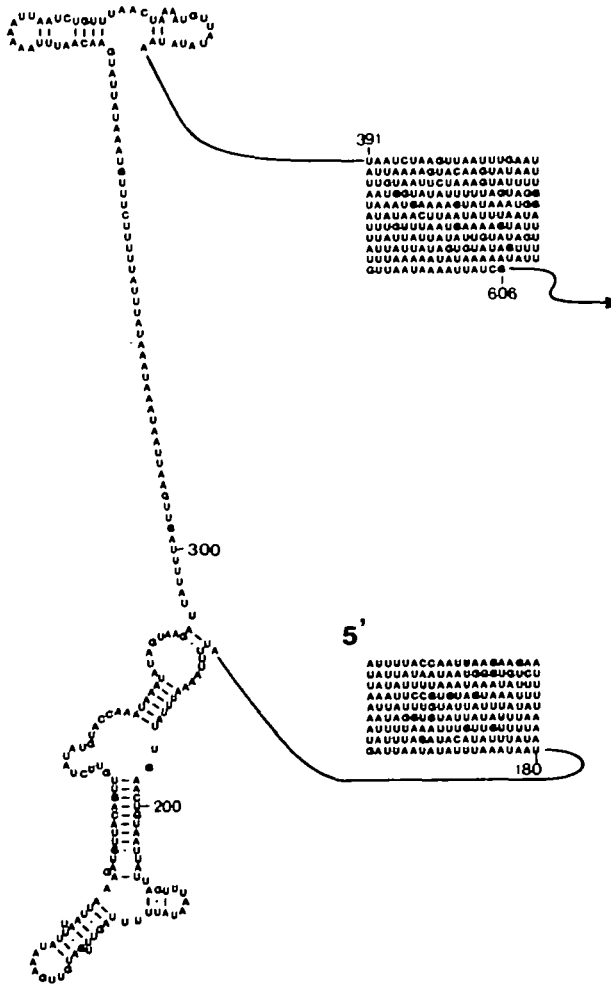

Downloaded from https://academic.oup.com/nar/article/16/suppl\_1/75/2358536 by guest on 20 April 2024

Fig.26a  
*Trypanosome brucei*

Secondary Structure of mitochondrial 23S Ribosomal RNA: 3'half

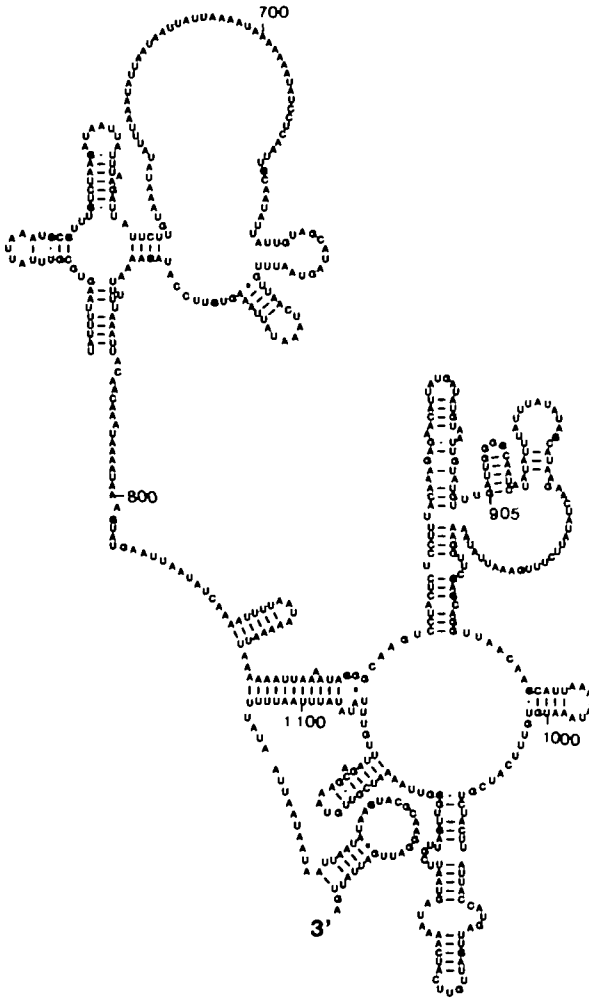

Fig.26b  
*Trypanosome brucei*

Downloaded from <https://academic.oup.com/nar/article/1/6/suppl/1/75/2358536> by guest on 20 April 2024



Secondary Structure of mitochondrial 23S Ribosomal RNA: 3'half

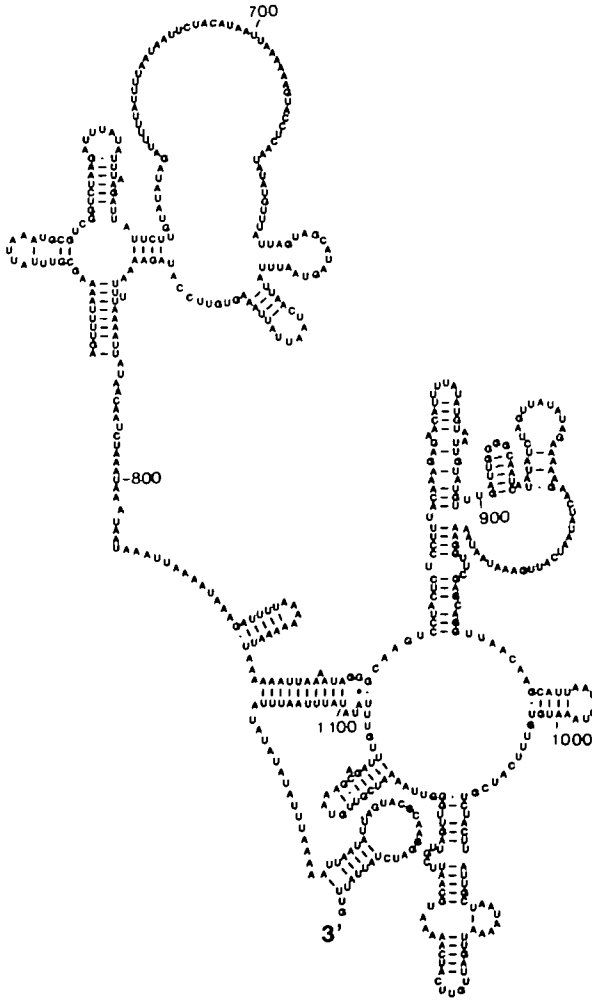

**Fig.27b**  
*Leishmania tarentolae*

Secondary Structure of archaeobacterial 23S Ribosomal RNA: 5'half

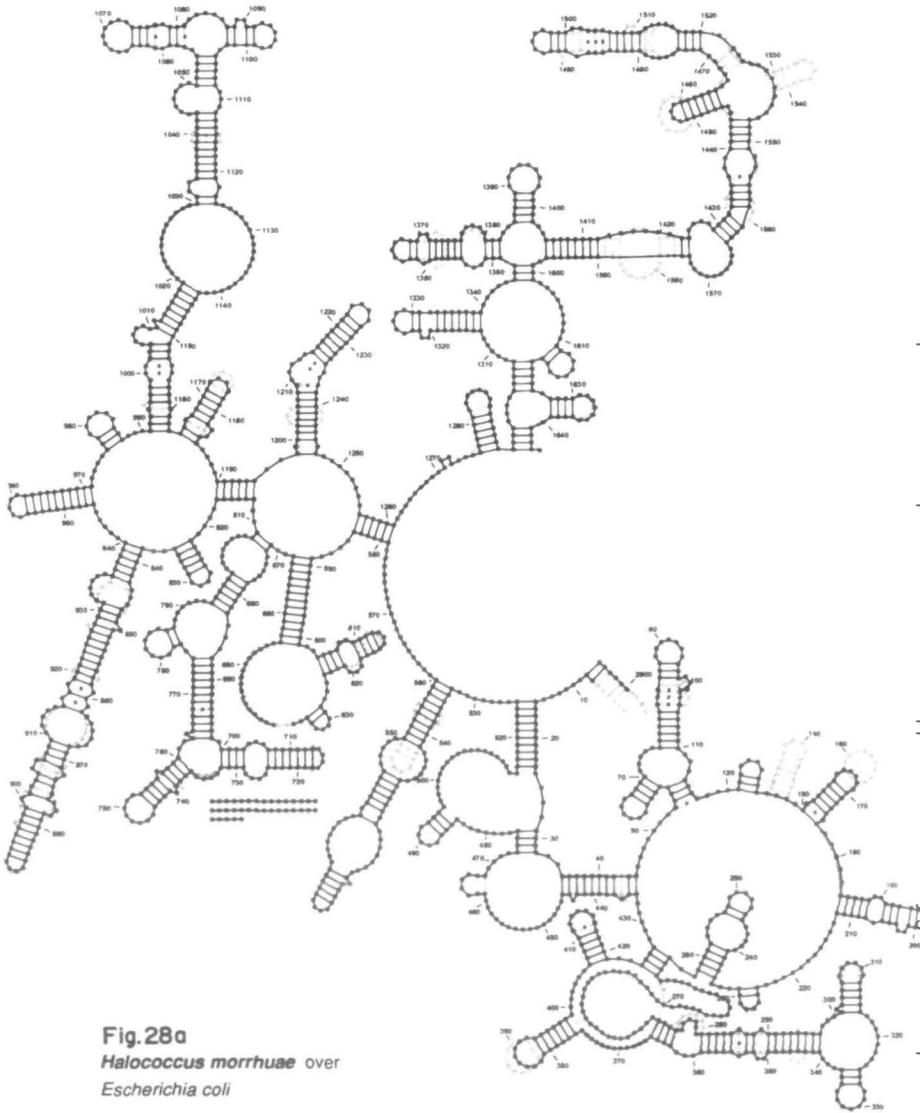

**Fig.28a**  
*Halococcus morrhuae* over  
*Escherichia coli*

Downloaded from <https://academic.oup.com/nar/article/1/6/suppl/1/75/2358536> by guest on 20 April 2024



Secondary Structure of archaebacterial 23S Ribosomal RNA: 3'half

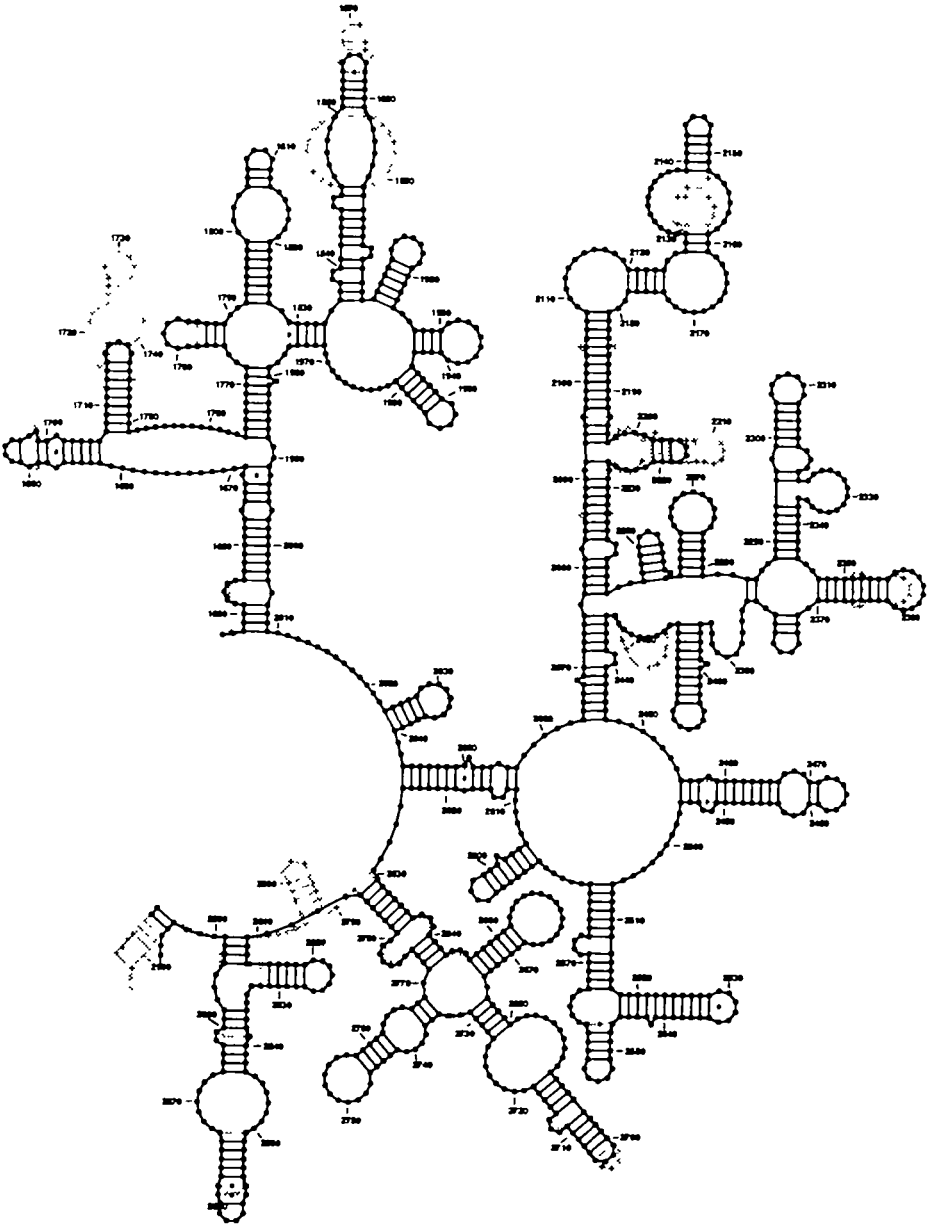

**Fig. 28b**  
*Halococcus morrhuae* over  
*Escherichia coli*

Secondary Structure of archaebacterial 23S Ribosomal RNA: 5'half

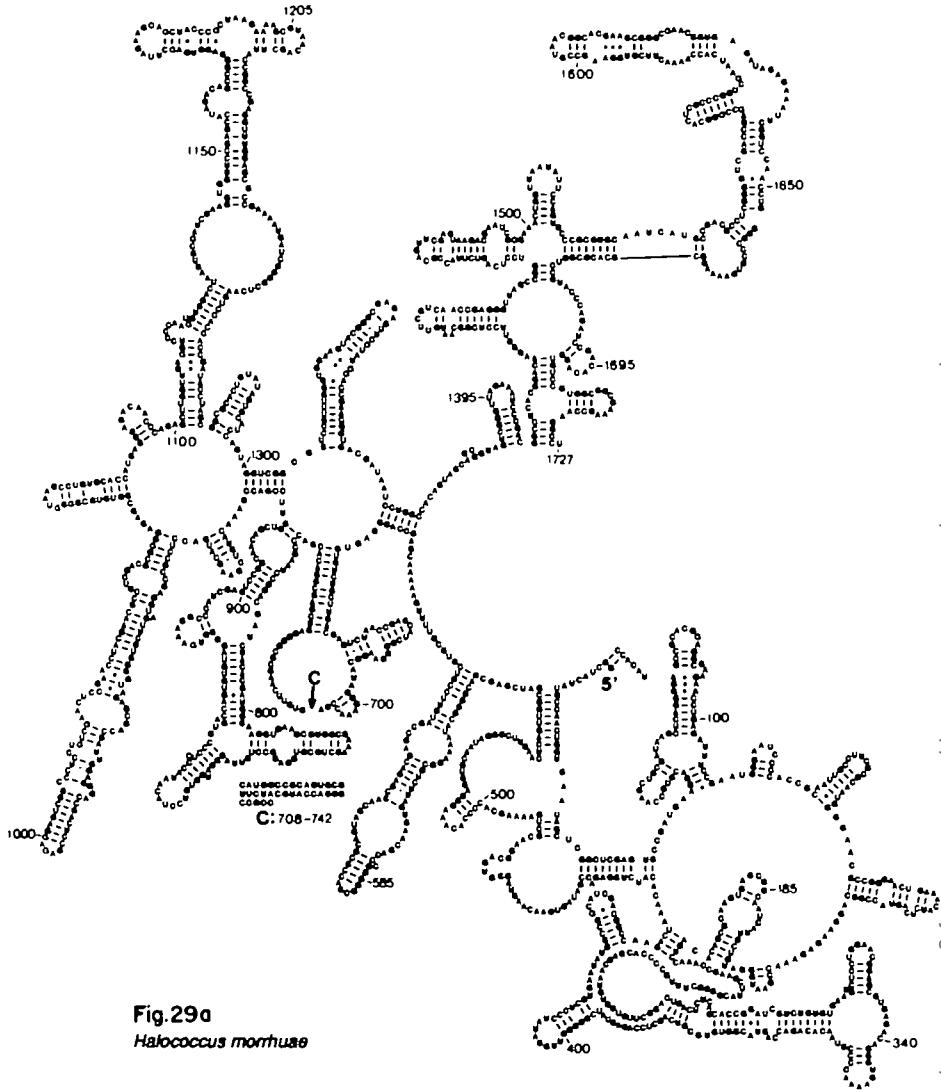

Fig. 29a  
*Halococcus morrhuae*

Downloaded from https://academic.oup.com/nar/article/16/suppl/1/75/2358536 by guest on 20 April 2024

Secondary Structure of archaebacterial 23S Ribosomal RNA: 3' half

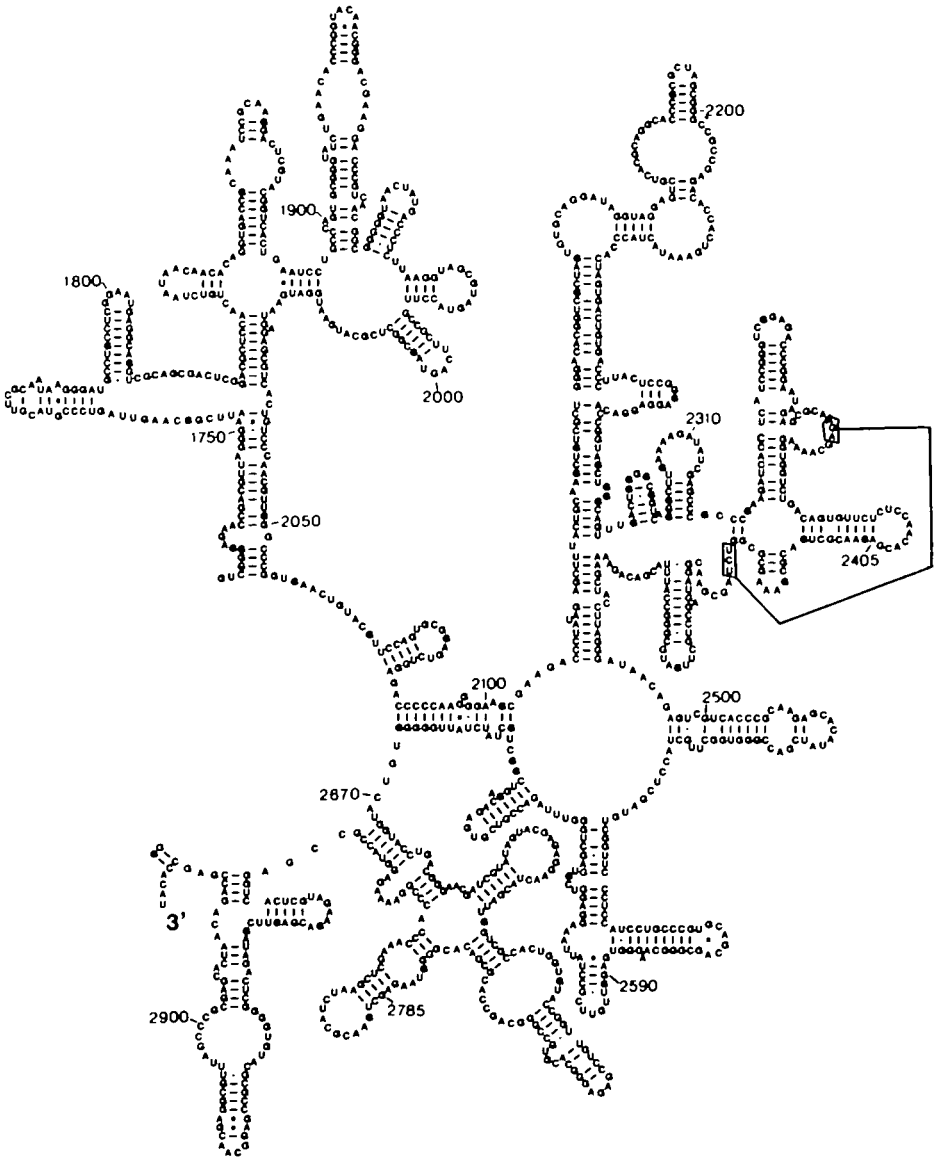

**Fig.29b**  
*Halococcus morrhuae*

Secondary Structure of archaebacterial 23S Ribosomal RNA: 5' half

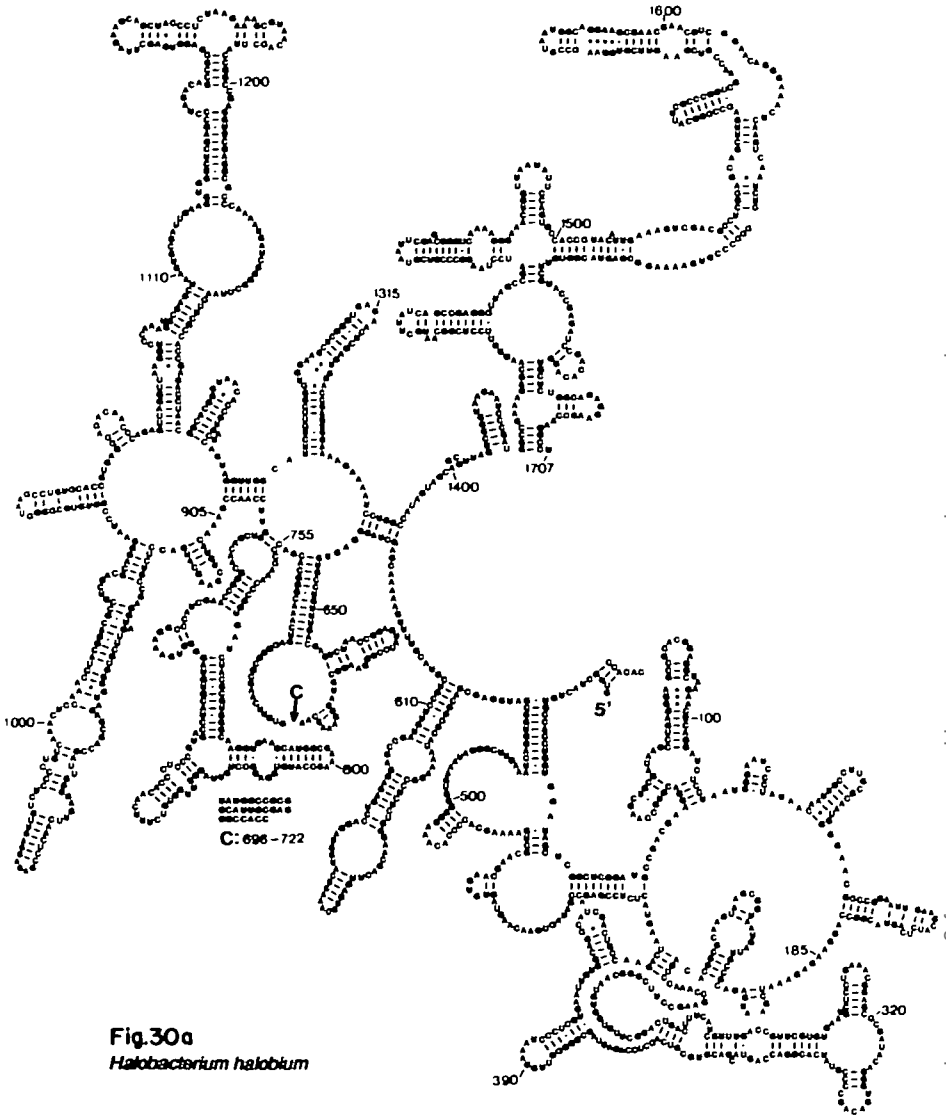

Secondary Structure of archaeobacterial 23S Ribosomal RNA: 3'half

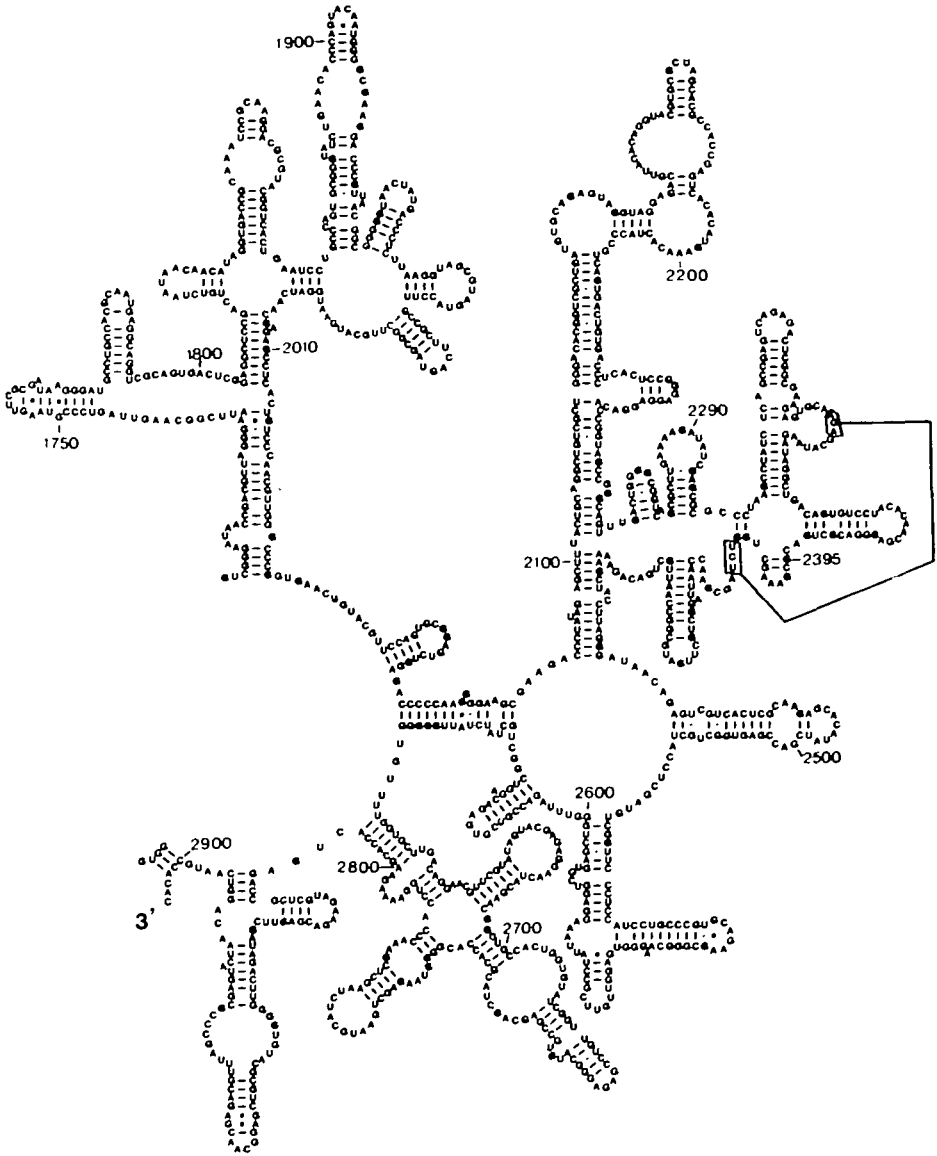

**Fig.30b**  
*Halobacterium halobium*

Secondary Structure of archaebacterial 23S Ribosomal RNA: 5'half

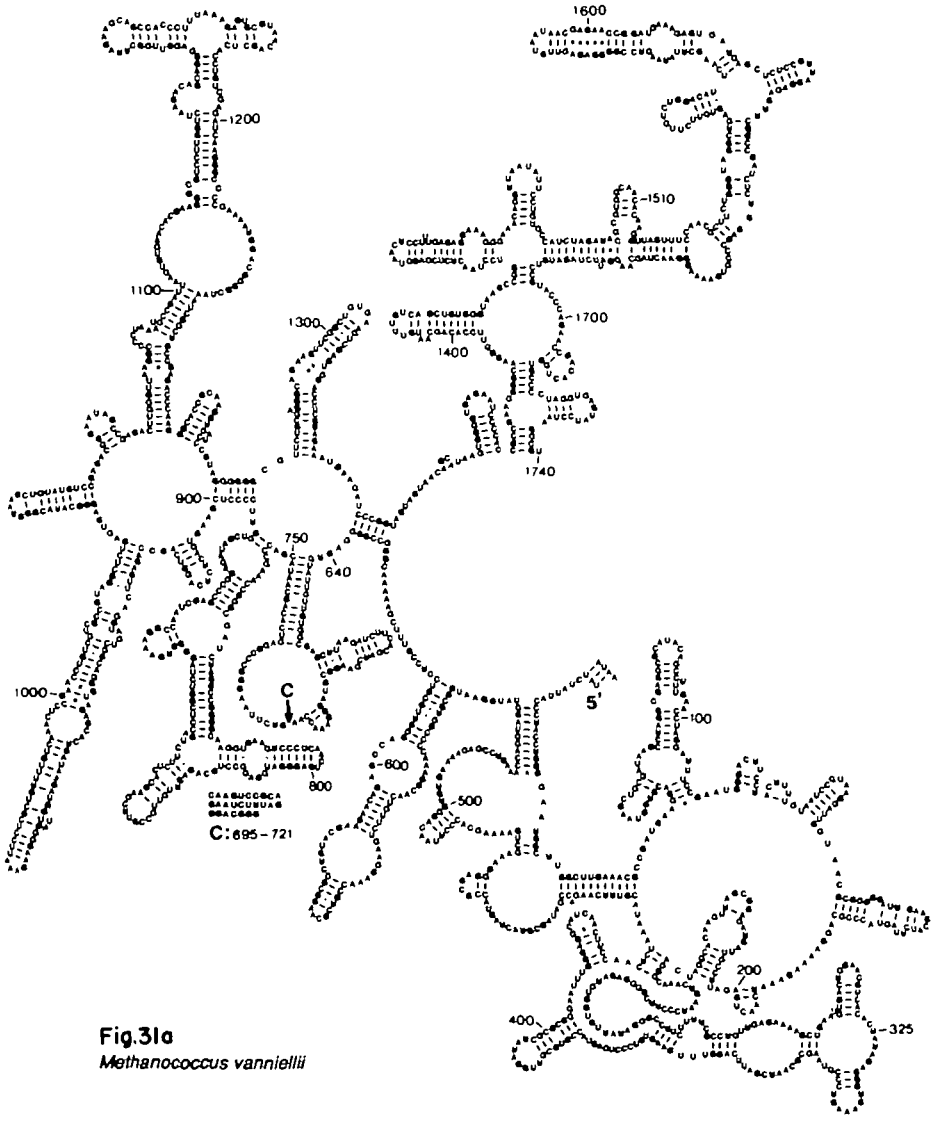

**Fig.31a**  
*Methanococcus vannielii*

Downloaded from <https://academic.oup.com/nar/article/1/6/suppl/1/75/2358536> by guest on 20 April 2024

Secondary Structure of archaeobacterial 23S Ribosomal RNA: 3'half

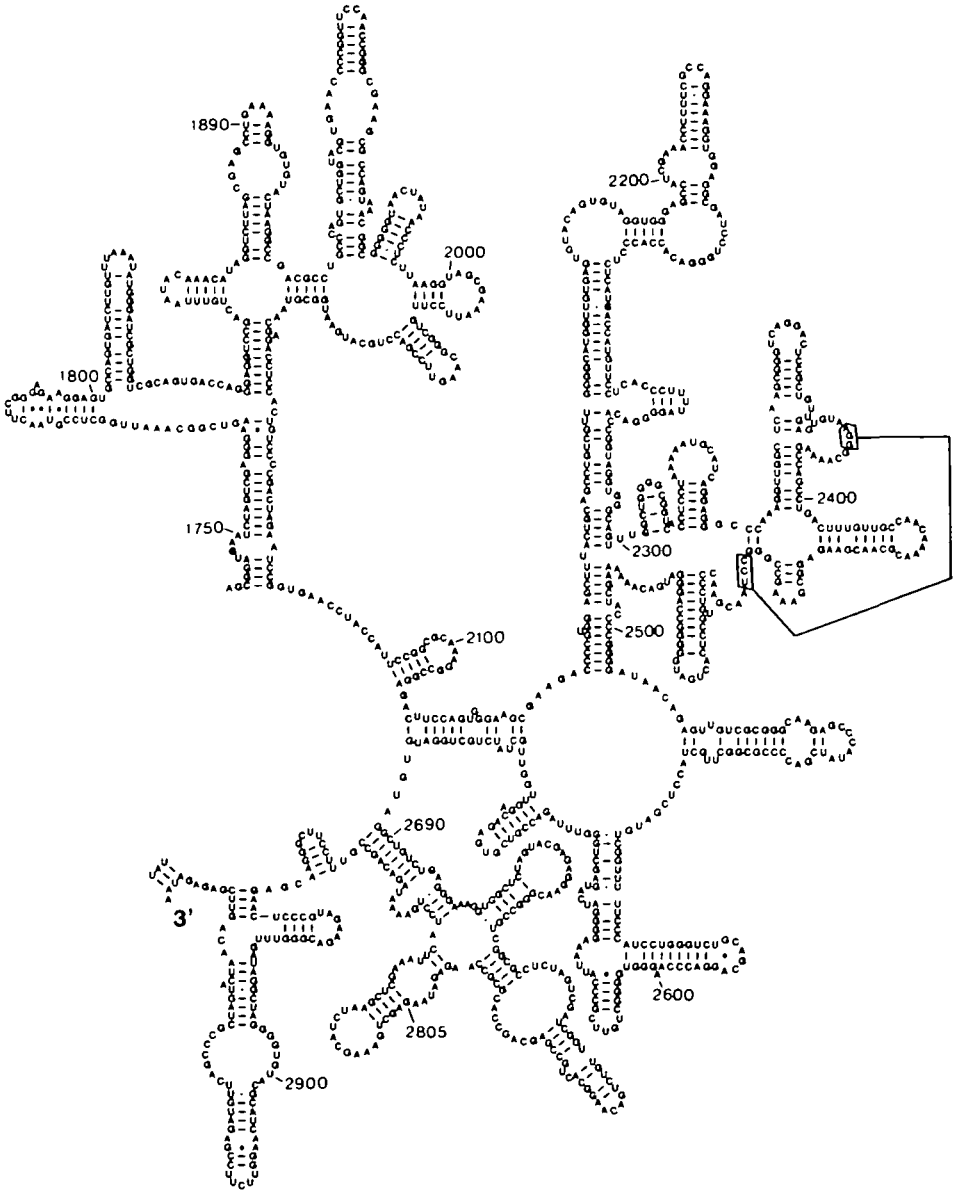

Fig.3Ib  
*Methanococcus vannielii*

Secondary Structure of archaebacterial 23S Ribosomal RNA: 5'half

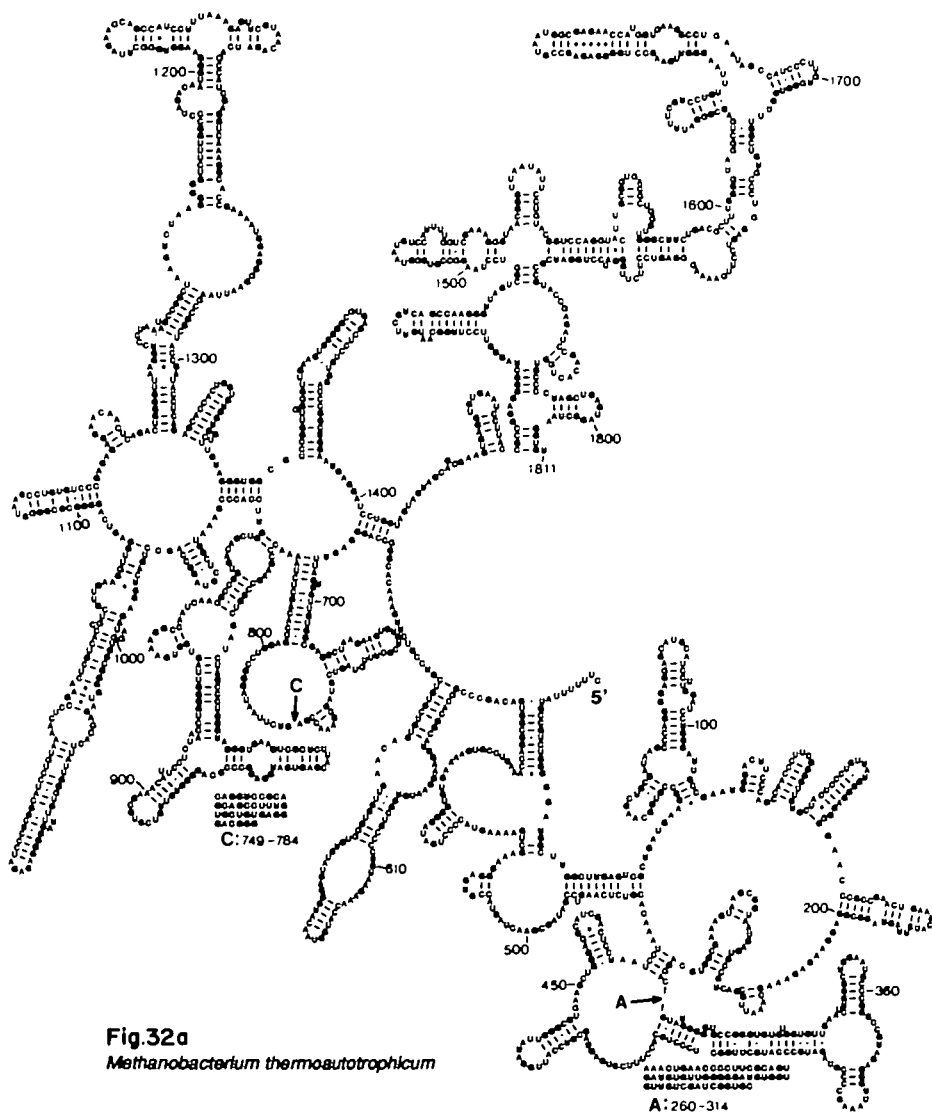

Fig.32a  
*Methanobacterium thermoautotrophicum*



Secondary Structure of archaebacterial 23S Ribosomal RNA: 3'half

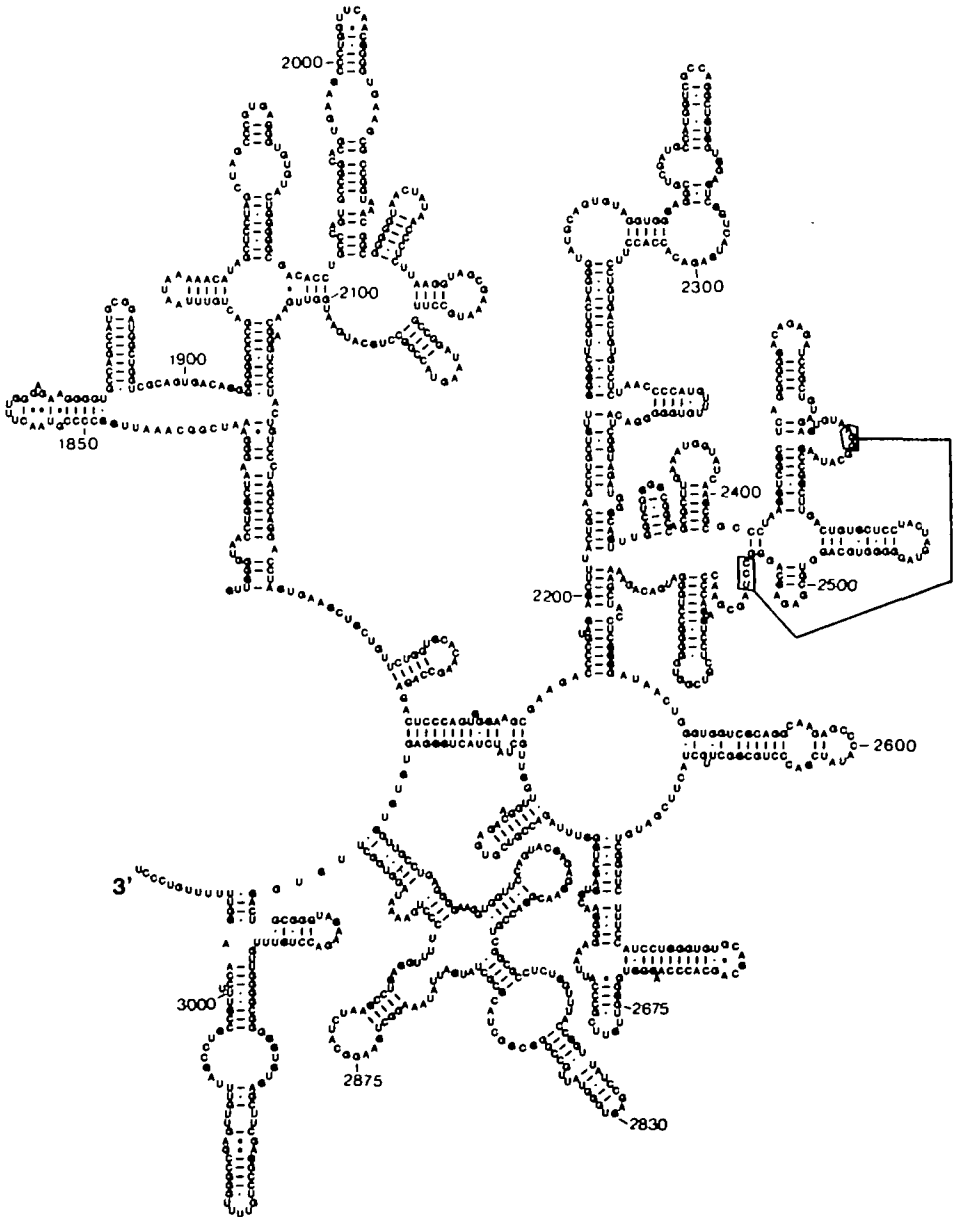

Fig.32b  
*Methanobacterium thermoautotrophicum*

Secondary Structure of archaebacterial 23S Ribosomal RNA: 5'half

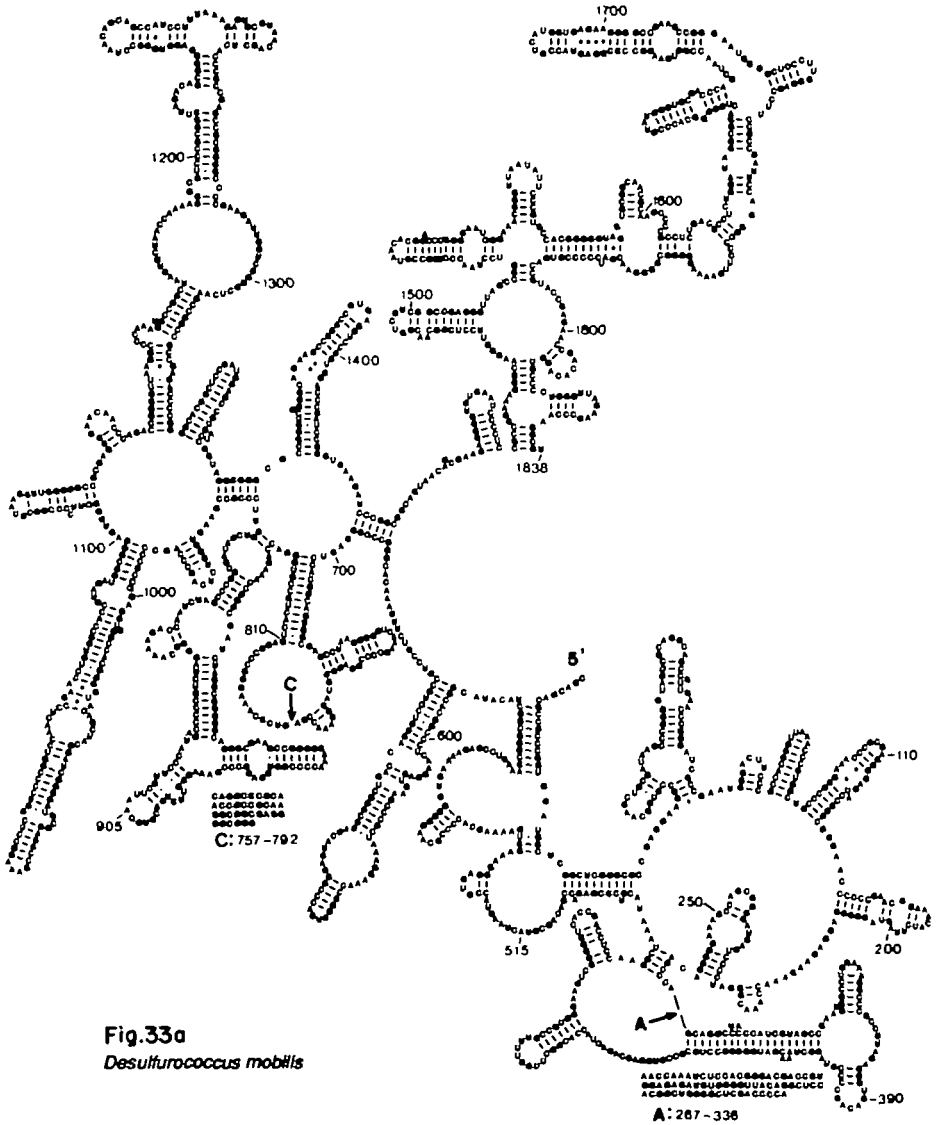

Fig.33a  
*Desulfurococcus mobilis*

Secondary Structure of archaebacterial 23S Ribosomal RNA: 3'half

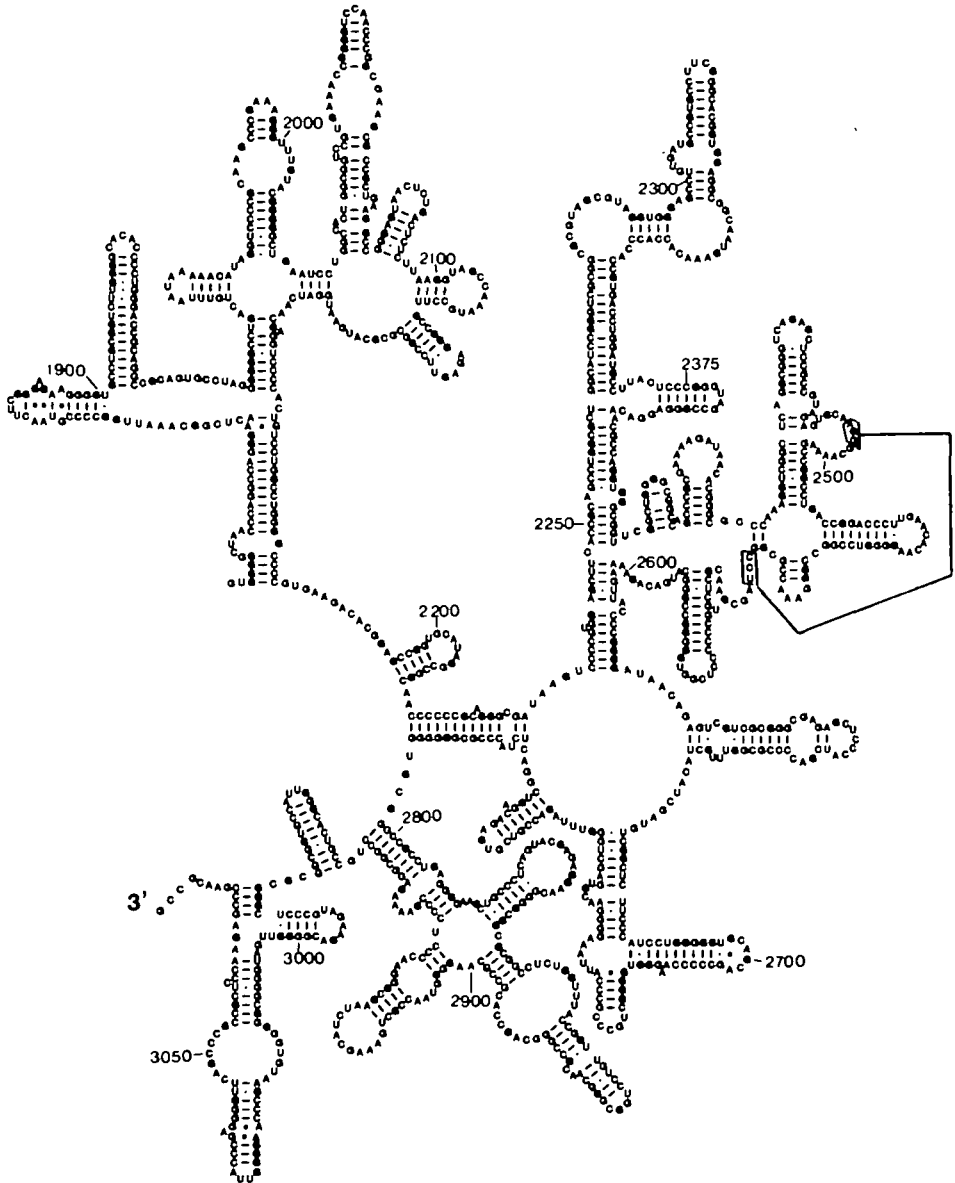

Fig.33b  
*Desulfurococcus mobilis*

Secondary Structure of eucaryotic 23S Ribosomal RNA: 5'half

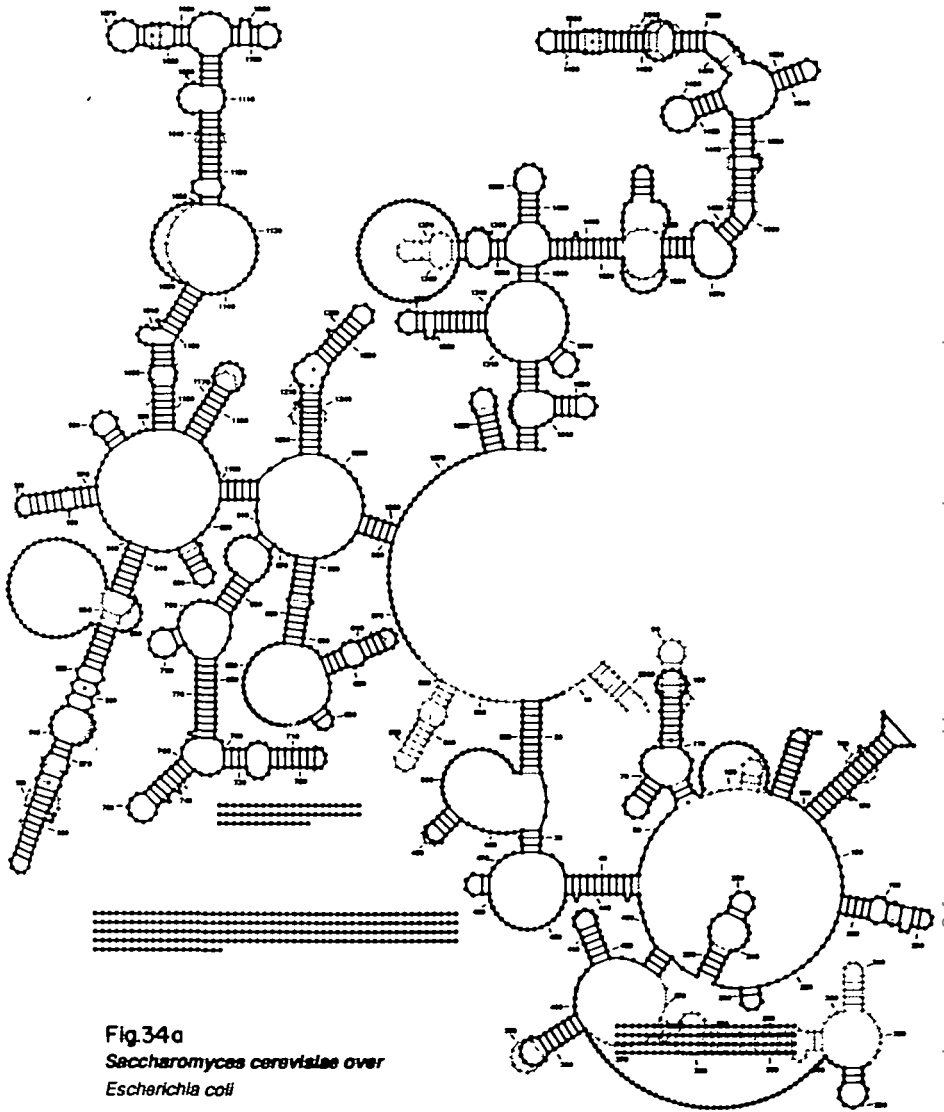

Fig.34a  
*Saccharomyces cerevisiae* over  
*Escherichia coli*

Secondary Structure of eucaryotic 23S Ribosomal RNA: 3'half

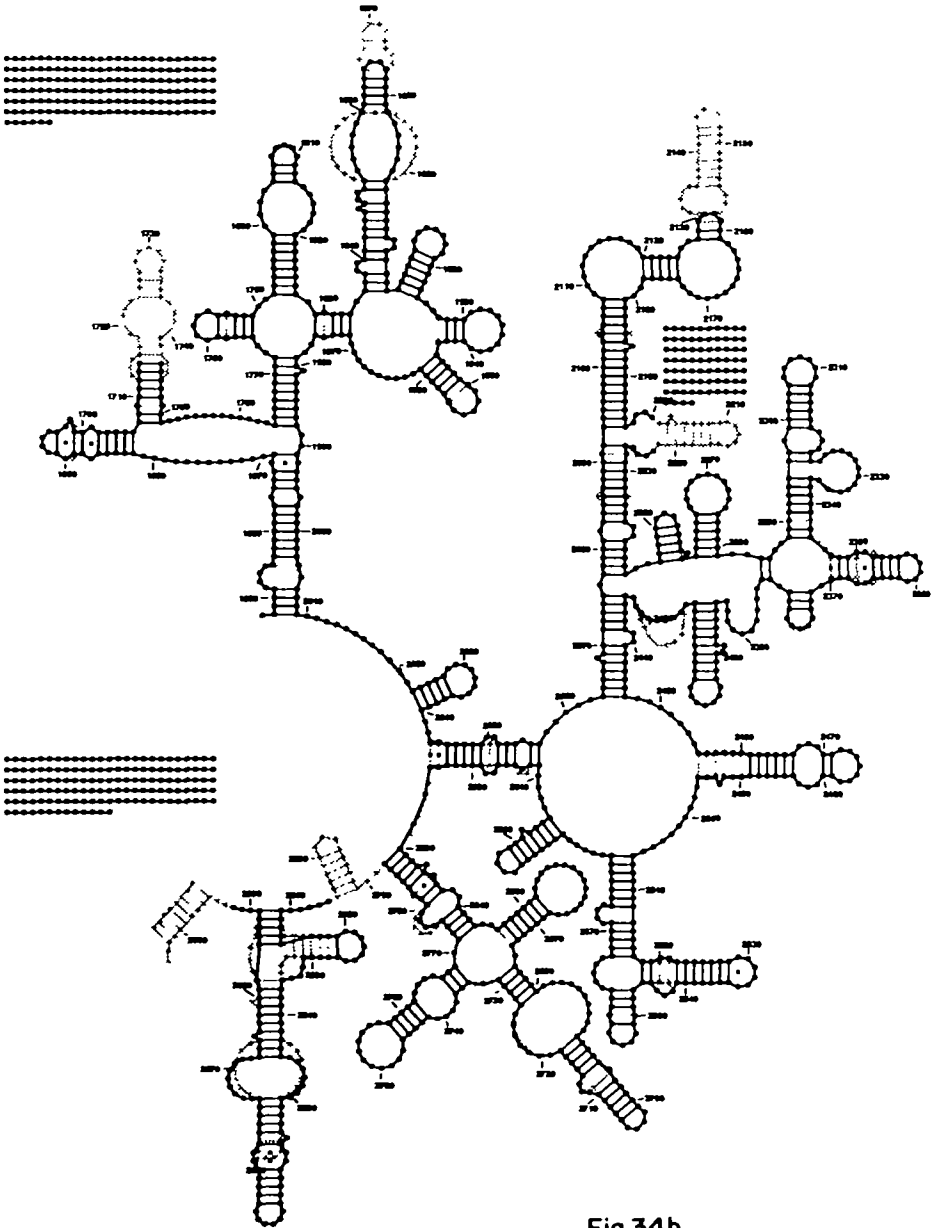

Fig.34b  
*Saccharomyces cerevisiae* over  
*Escherichia coli*

Secondary Structure of eucaryotic 23S Ribosomal RNA: 5' half

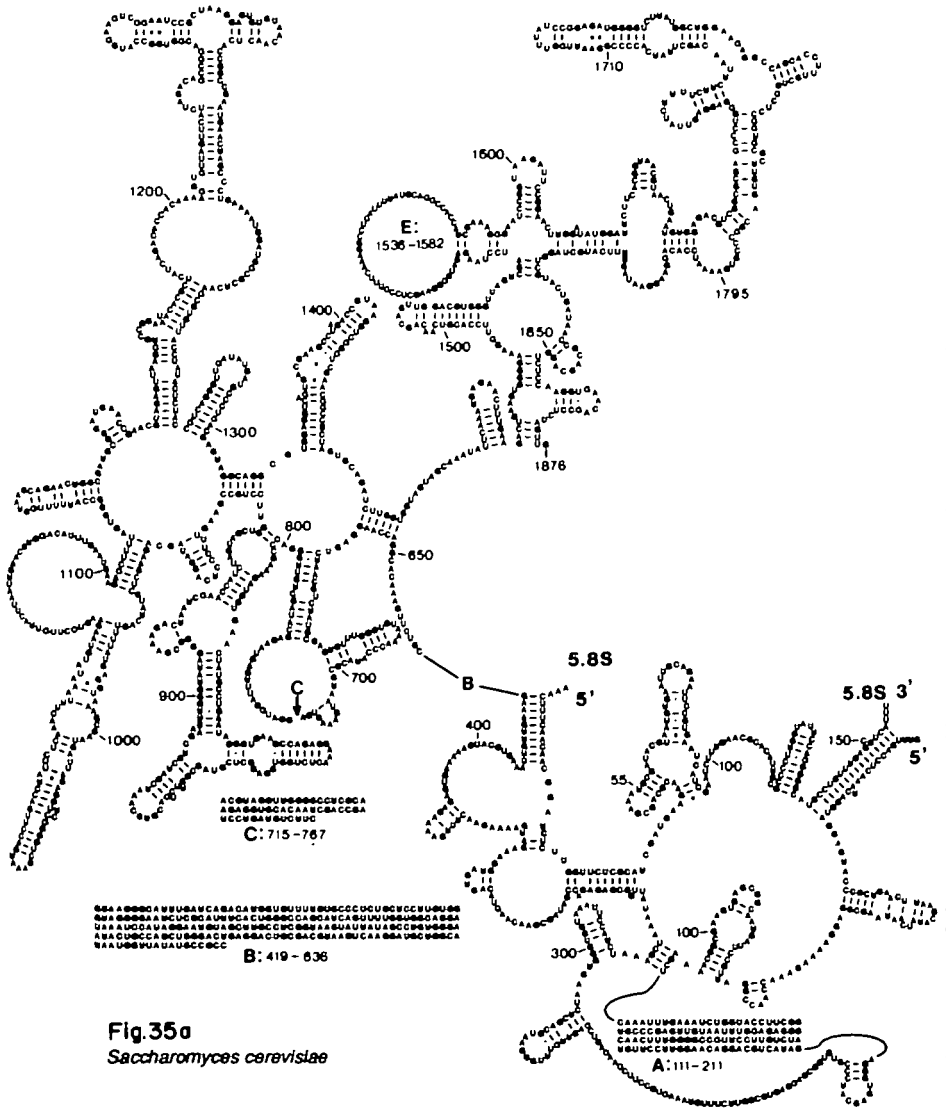

Fig. 35a  
*Saccharomyces cerevisiae*

Downloaded from https://academic.oup.com/nar/article/16/suppl/1/75/2358536 by guest on 20 April 2024

Secondary Structure of eucaryotic 23S Ribosomal RNA: 3'half

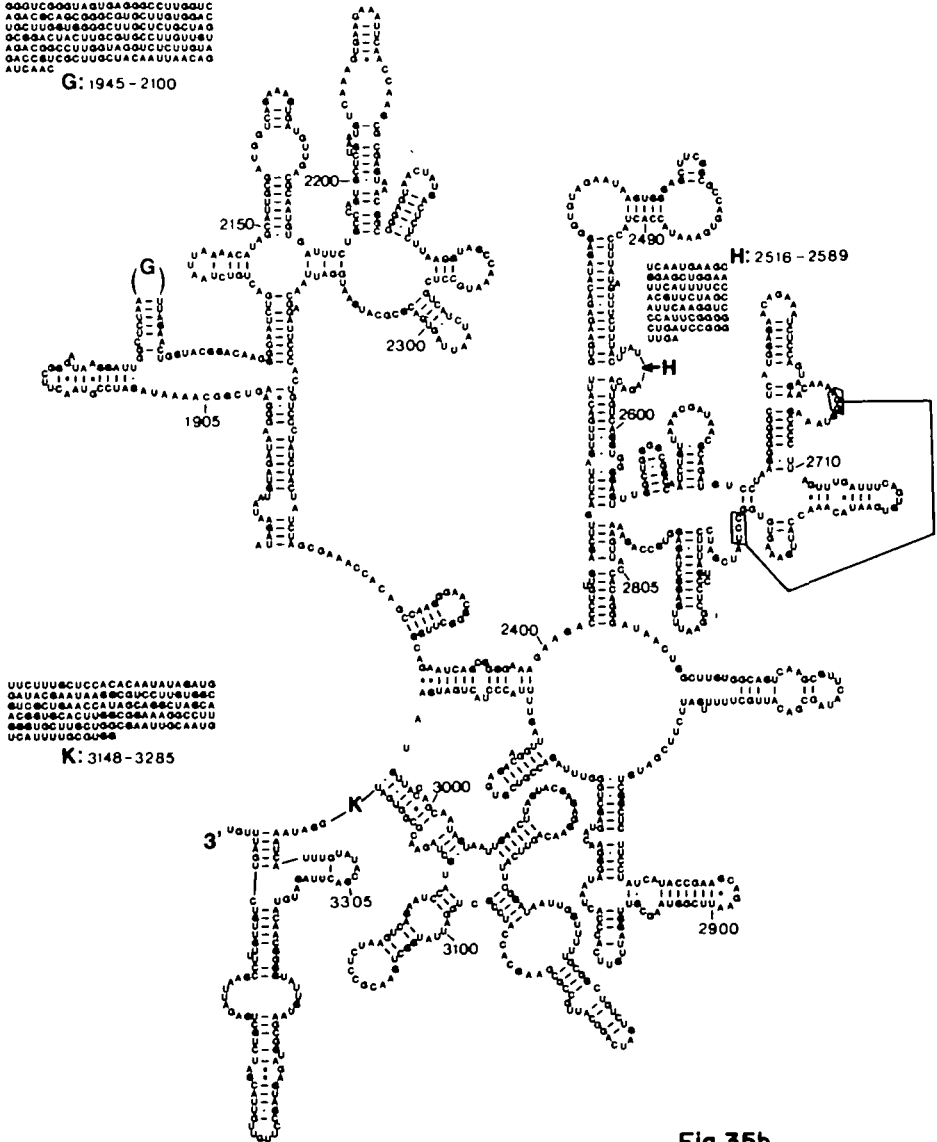

Fig. 35b  
*Saccharomyces cerevisiae*

Downloaded from <https://academic.oup.com/nar/article/11/6/suppl/1/75/2358536> by guest on 20 April 2024

Secondary Structure of eucaryotic 23S Ribosomal RNA: 5'half

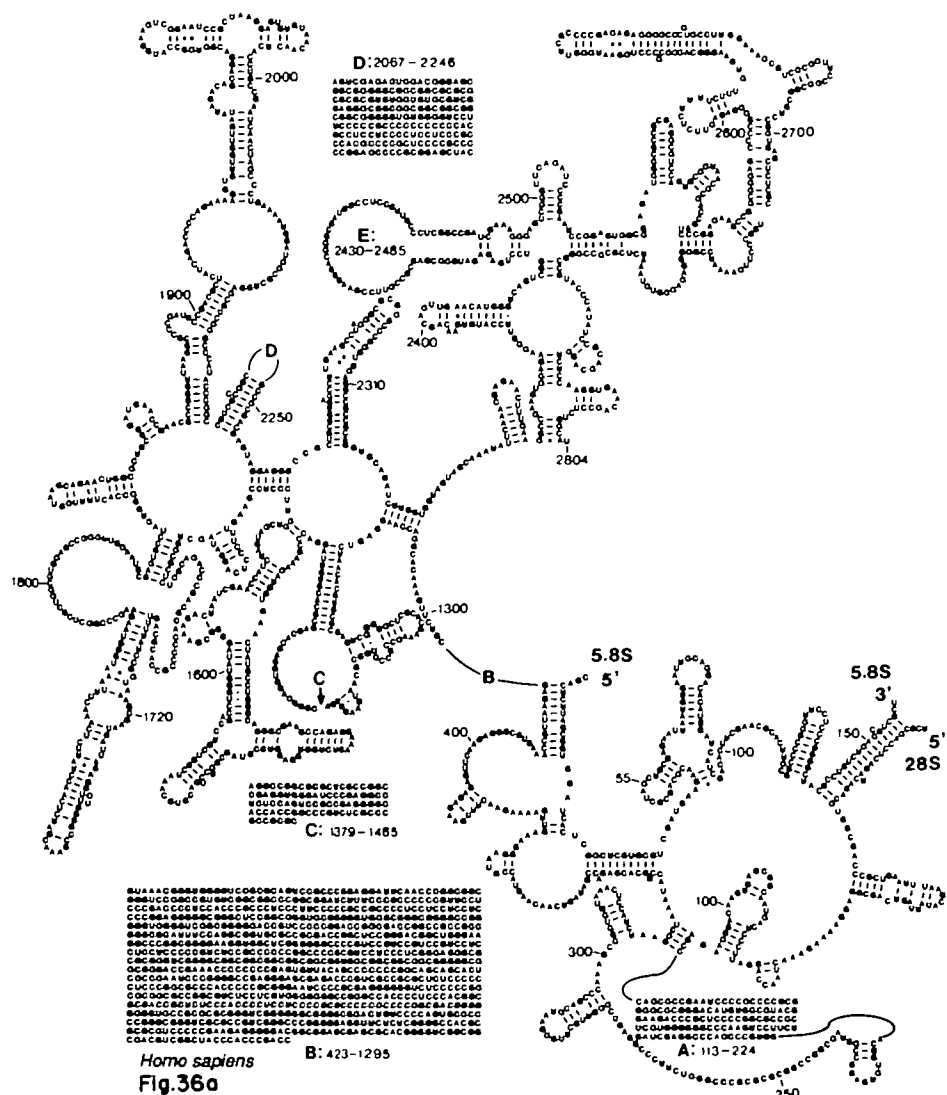



Secondary Structure of eucaryotic 23S Ribosomal RNA: 3'half

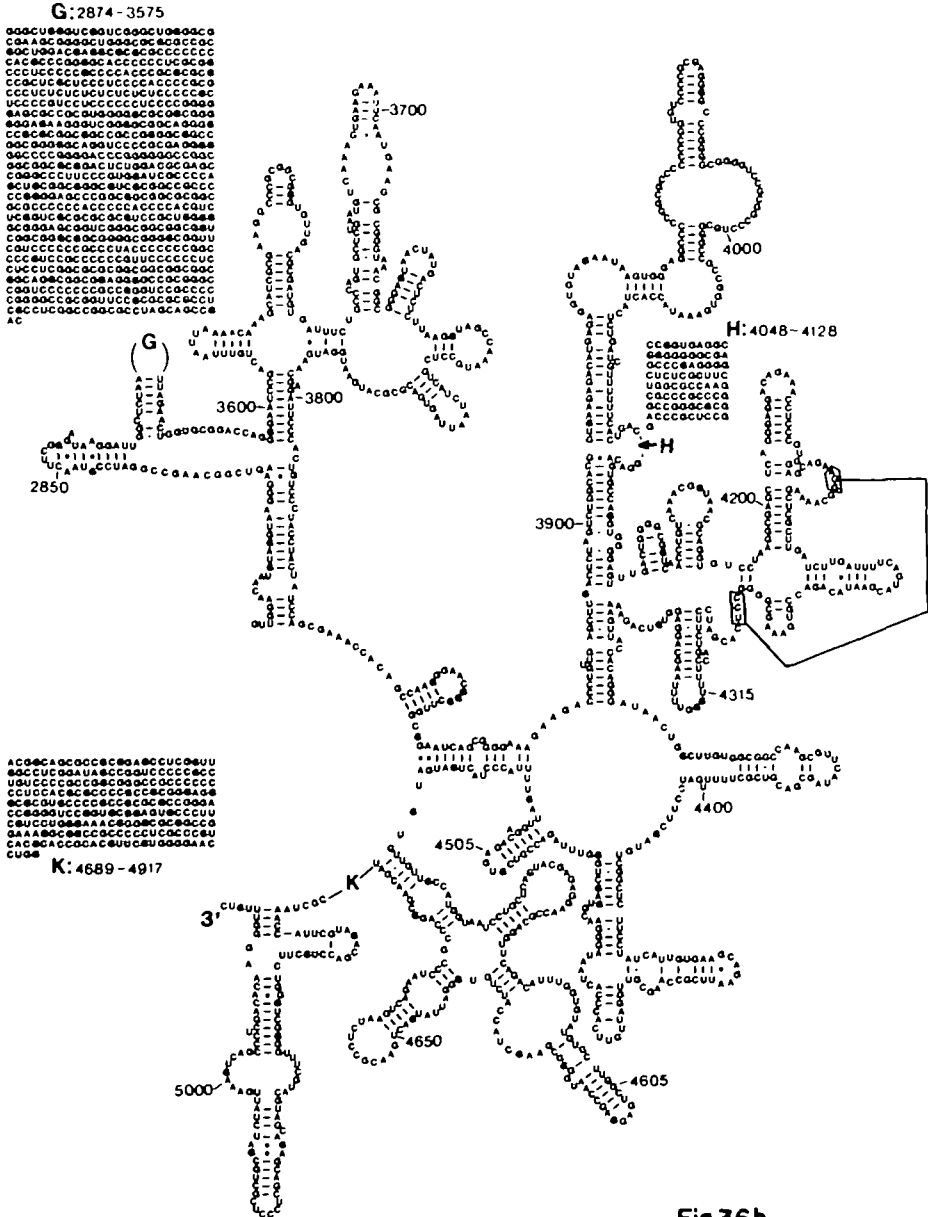

Fig.36b  
*Homo sapiens*

Downloaded from https://academic.oup.com/nar/article/16/suppl/1/75/2358536 by guest on 20 April 2024



Secondary Structure of eucaryotic 23S Ribosomal RNA: 3'half

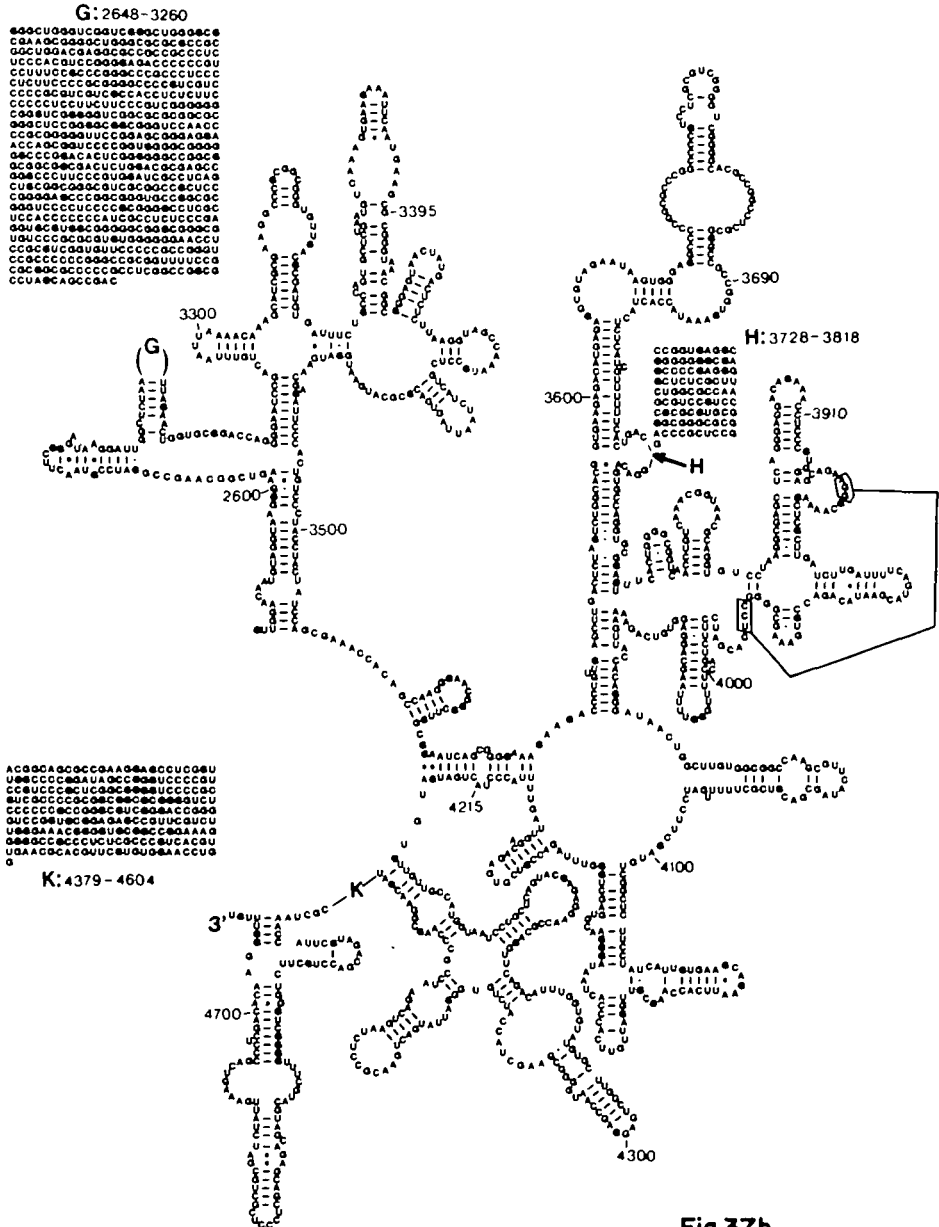

Fig.37b  
Mouse







Secondary Structure of eucaryotic 23S Ribosomal RNA: 3' half

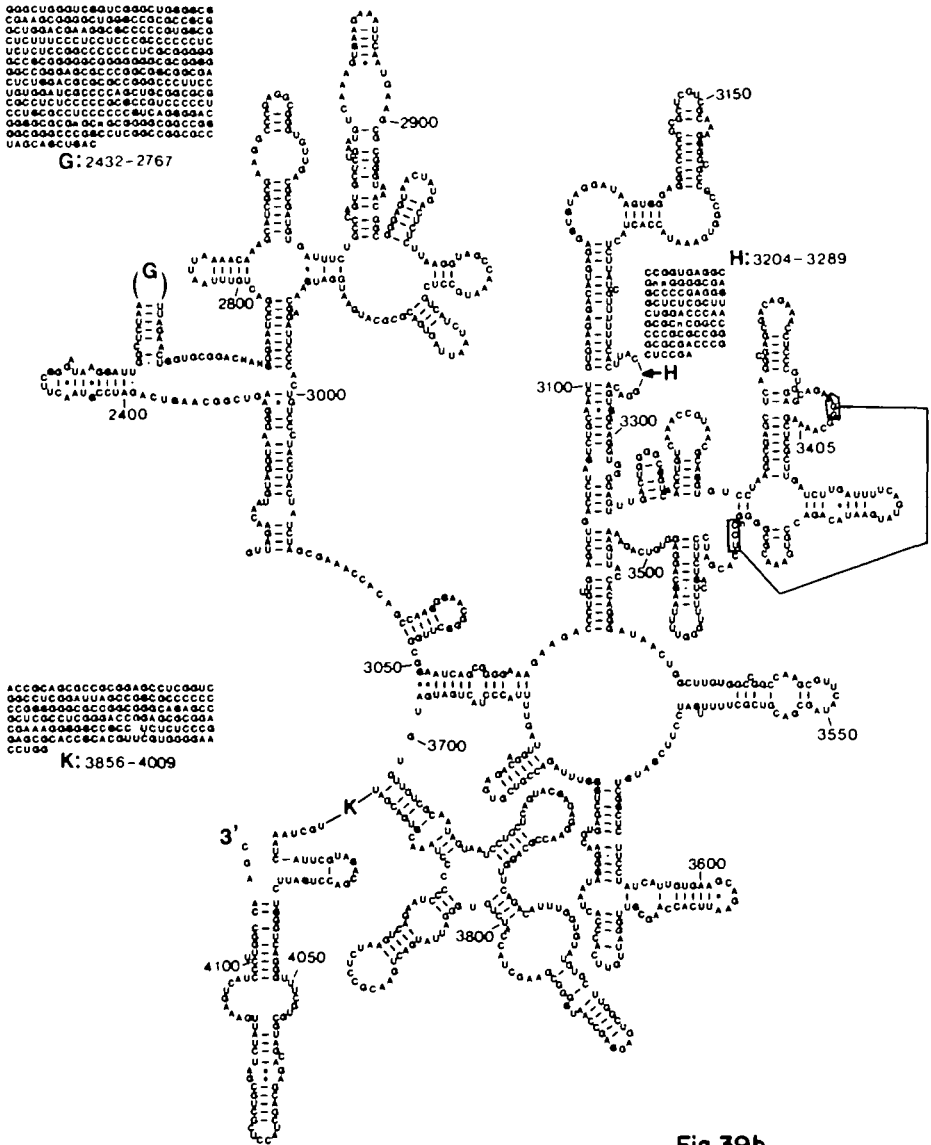

**Fig.39b**  
*Xenopus laevis*

Secondary Structure of eucaryotic 23S Ribosomal RNA: 5'half

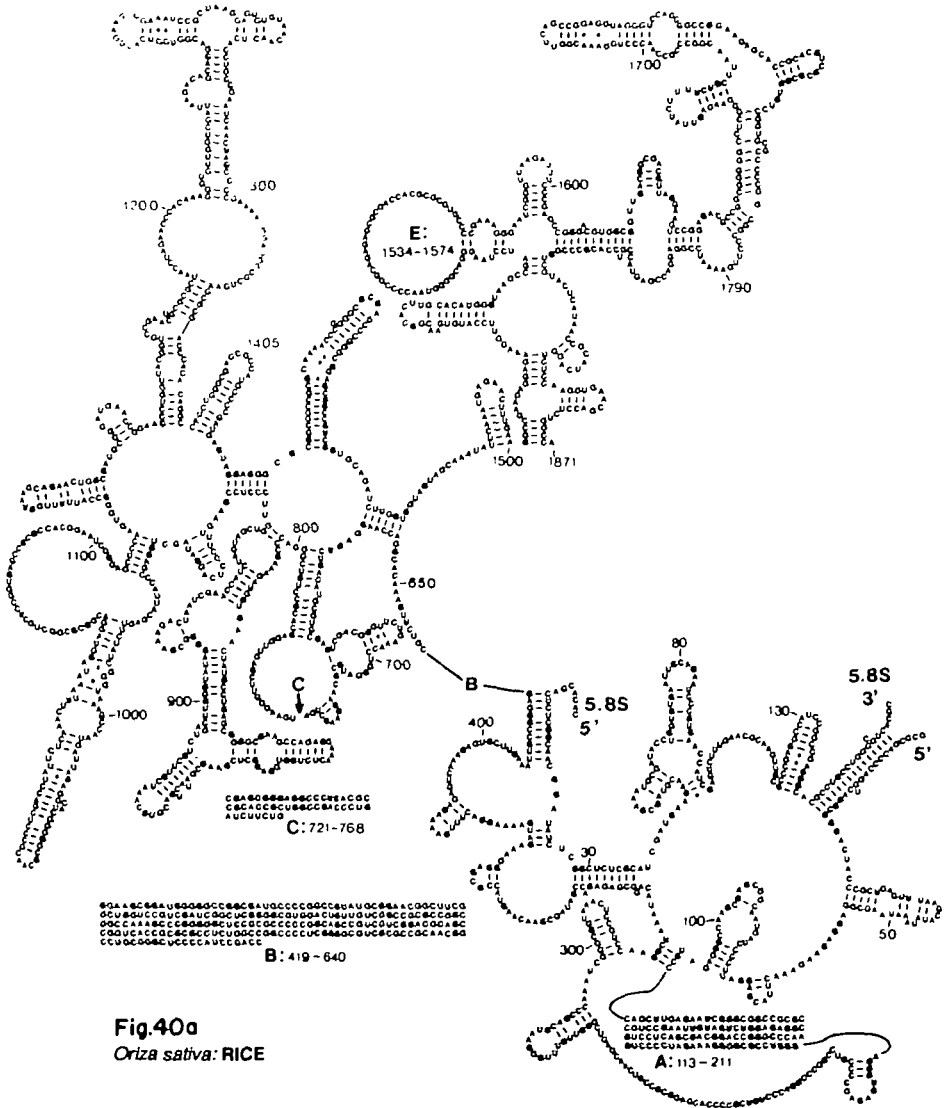



Secondary Structure of eucaryotic 23S Ribosomal RNA: 3'half

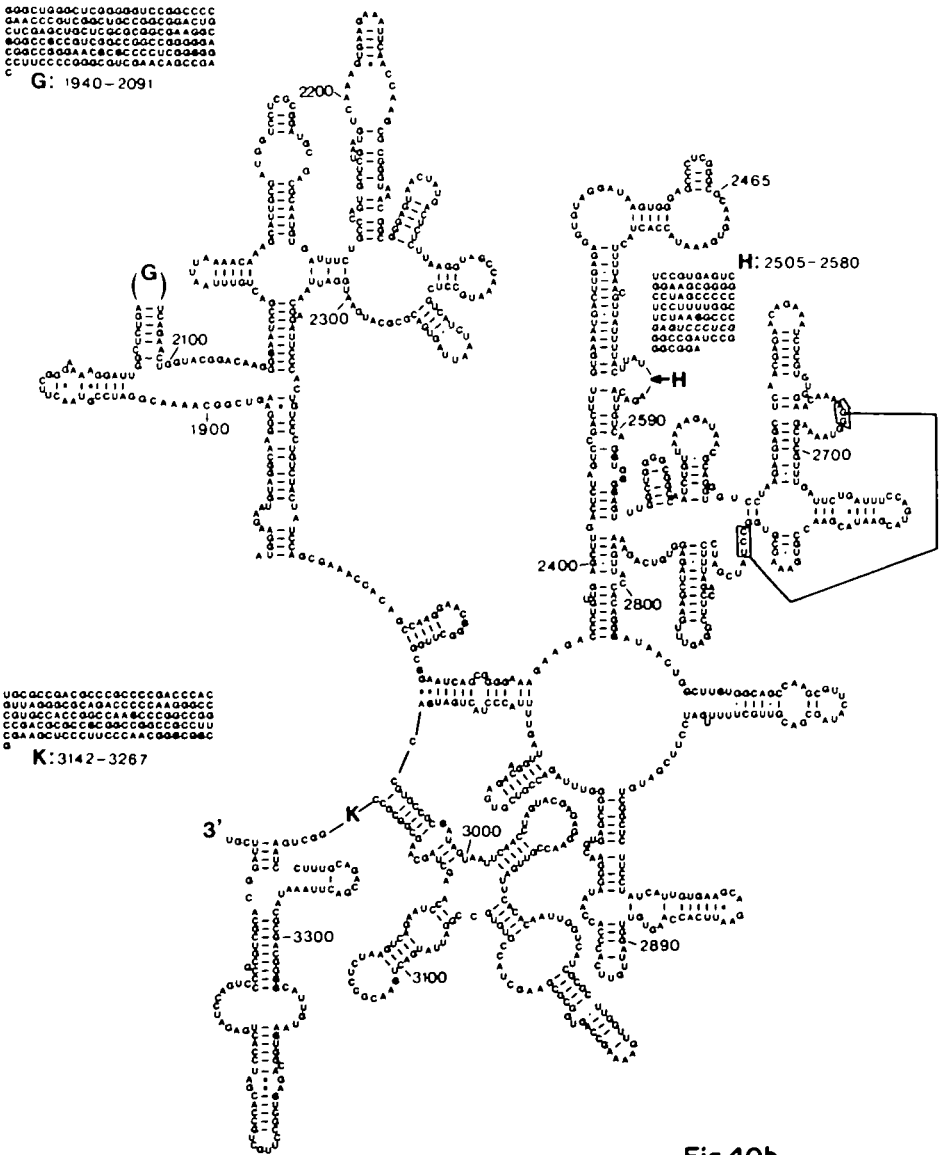

**Fig.40b**  
*Oriza sativa*: RICE

Downloaded from https://academic.oup.com/nar/article/16/suppl/1/75/2358536 by guest on 20 April 2024

Secondary Structure of eucaryotic 23S Ribosomal RNA: 5'half

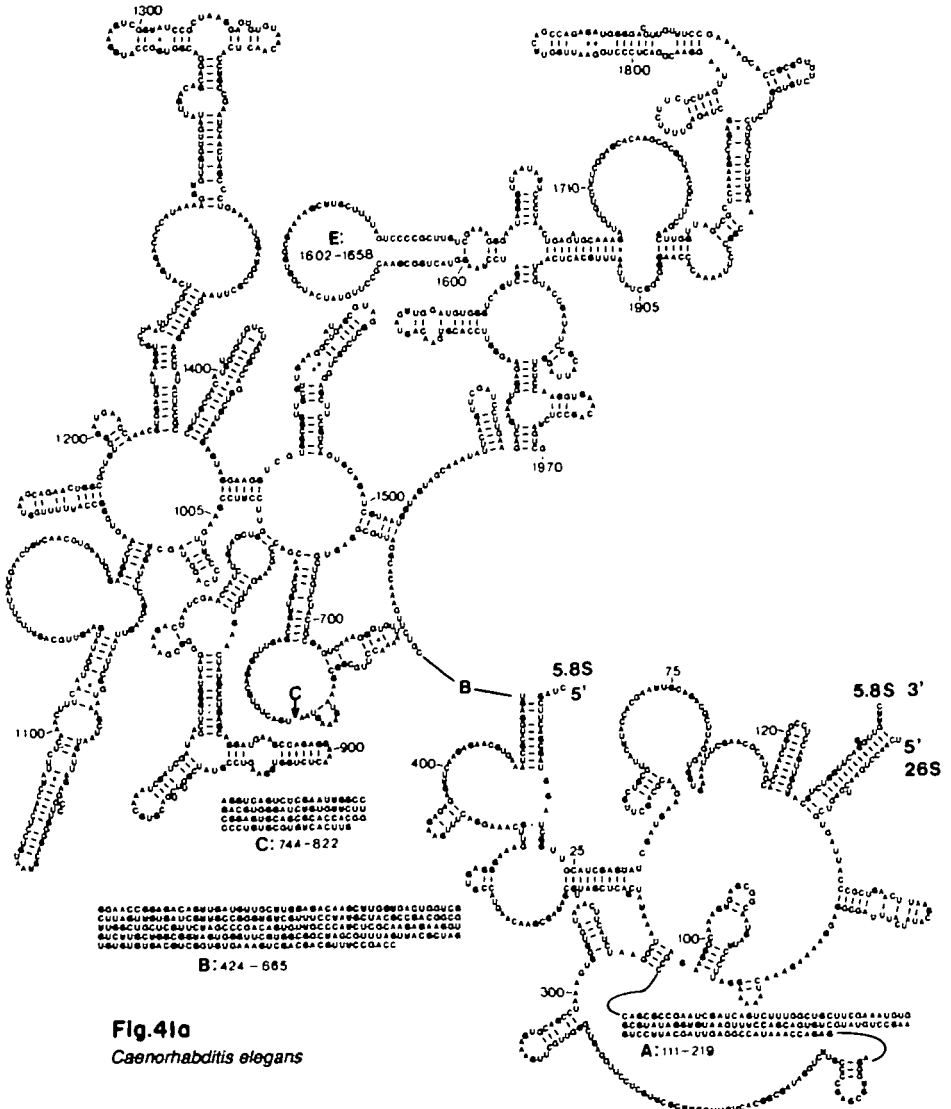

**Fig. 41c**  
*Caenorhabditis elegans*



Secondary Structure of eucaryotic 23S Ribosomal RNA: 5'half

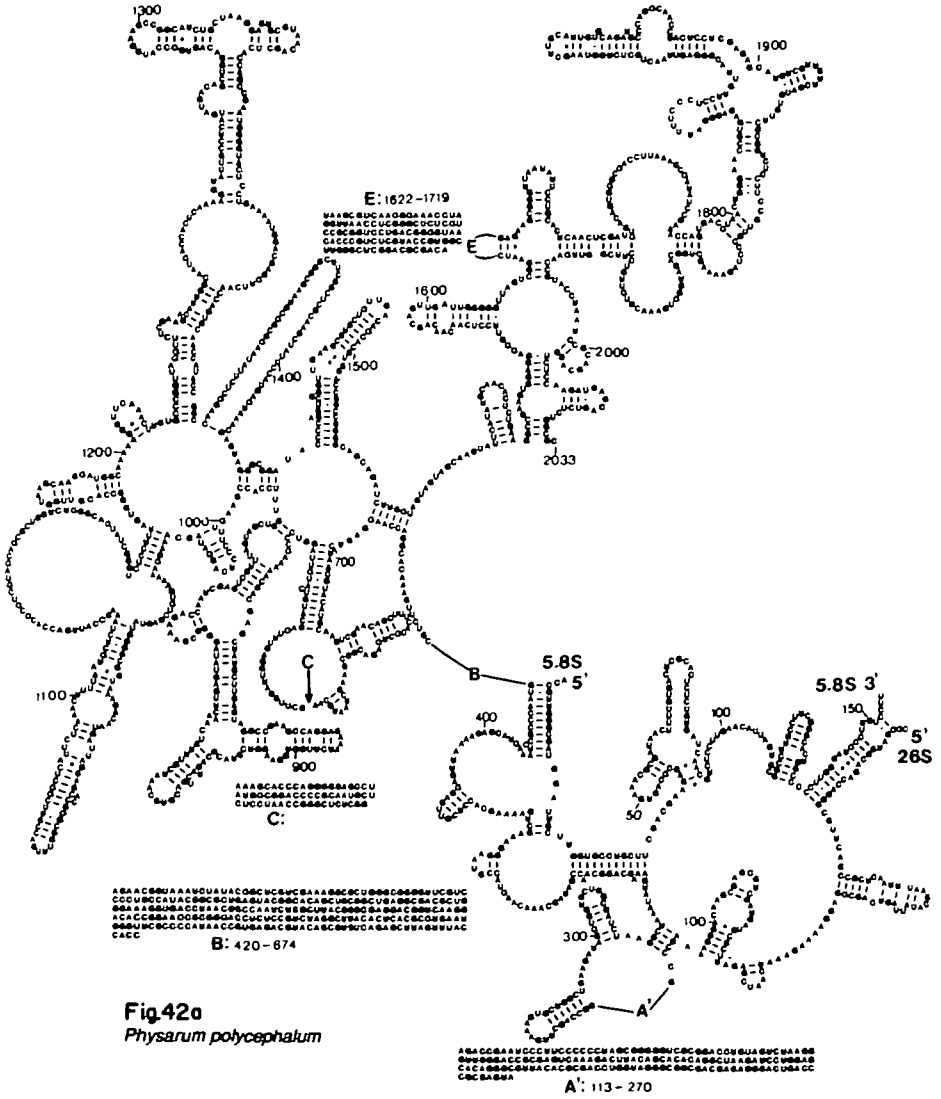

Downloaded from https://academic.oup.com/nar/article/16/suppl/1/751/2358536 by guest on 20 April 2024

Secondary Structure of eucaryotic 23S Ribosomal RNA: 3'half

```

A@CUC@BUUCUCU@CUC@CUC@U@B@U@
A@CUCUC@C@U@U@U@U@U@U@U@U@
U@C@C@A@G@C@C@U@U@C@G@U@C@C@B@A
@A@C@U@G@A@A@C@C@C@U@C@C@C@C@U
C@A@A@A@F@A@U@C@U@U@C@C@A@B@U@C
@C@C@G@A@U@G@U@A@A@A@C@C@C@A@C
C@C@U@A@A@C@G@U@A@C
    
```

G: 2103-2268

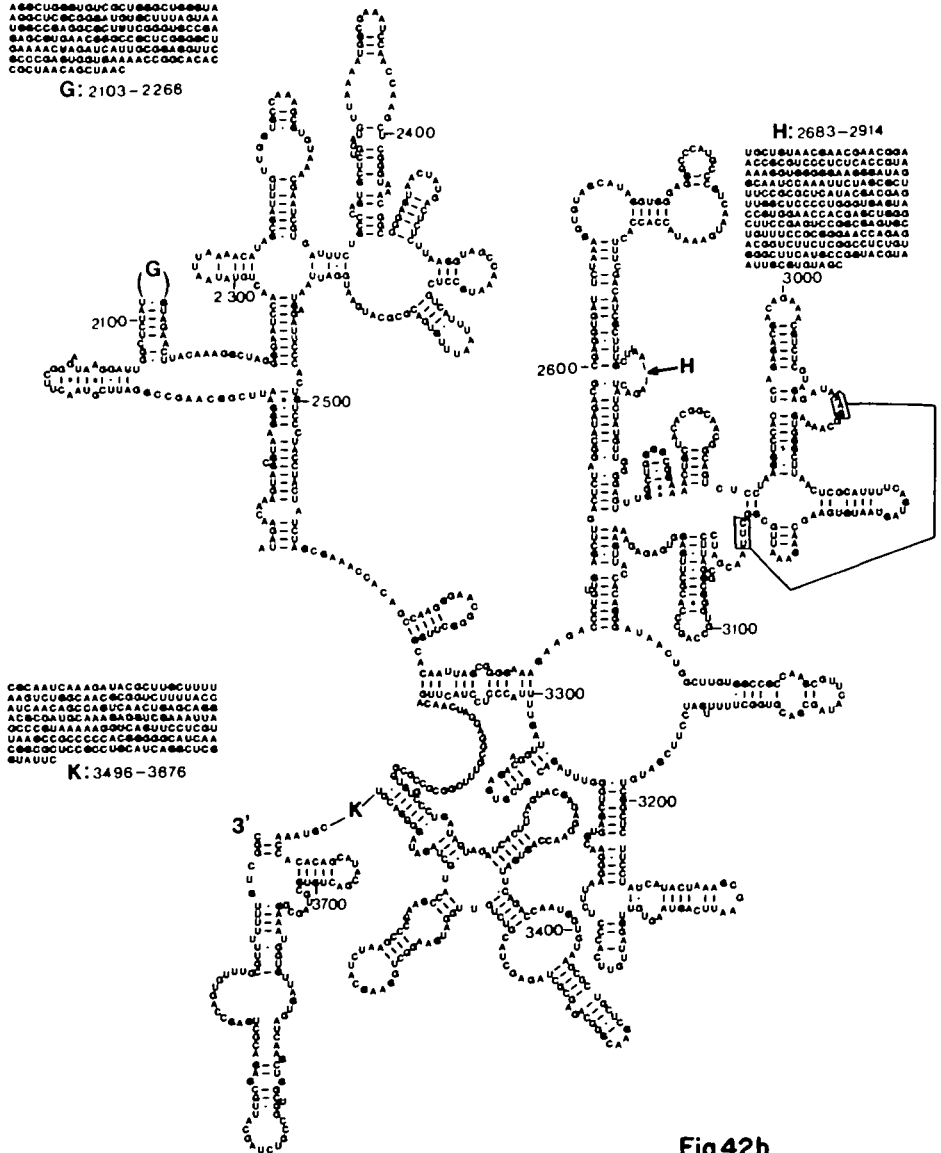

```

C@C@A@U@A@A@B@U@A@C@G@C@U@U@C@U@U@U@
A@G@U@C@U@C@A@A@C@C@C@G@U@U@U@U@A@C@C
A@U@C@A@A@C@C@A@U@C@A@C@U@A@C@A@B@C@A@B@
A@C@C@G@A@U@C@A@A@B@A@B@U@C@A@A@U@A
G@C@C@B@U@A@A@A@A@G@C@A@C@U@C@C@U@C@U
U@A@C@C@C@C@C@C@C@C@C@C@G@C@A@U@C@A
C@C@C@C@U@C@C@C@U@C@A@U@A@B@C@C@B
@U@A@U@C
    
```

K: 3496-3876

Fig.42b  
*Physarum polycephalum*

Secondary Structure of eucaryotic 23S Ribosomal RNA: 5'half

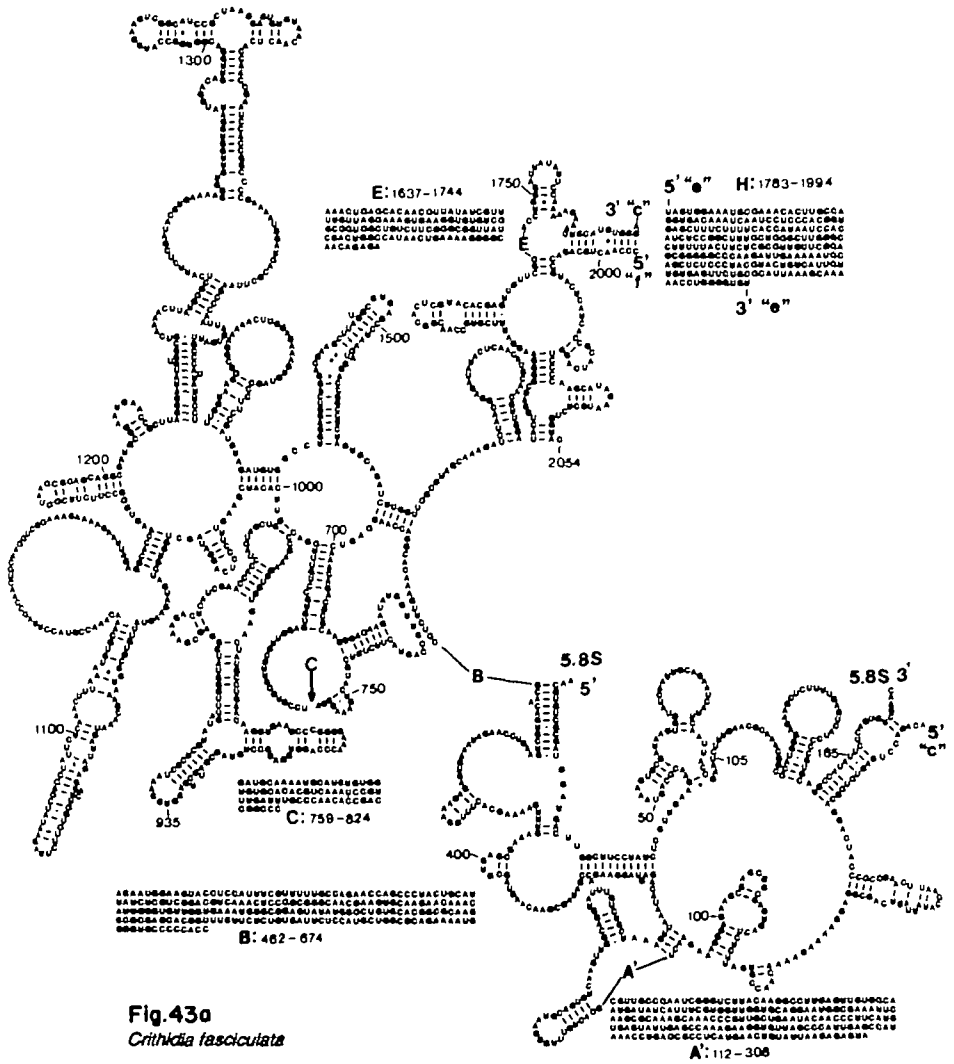

**Fig.43a**  
*Crithidia fasciculata*

Secondary Structure of eucaryotic 23S Ribosomal RNA: 3'half

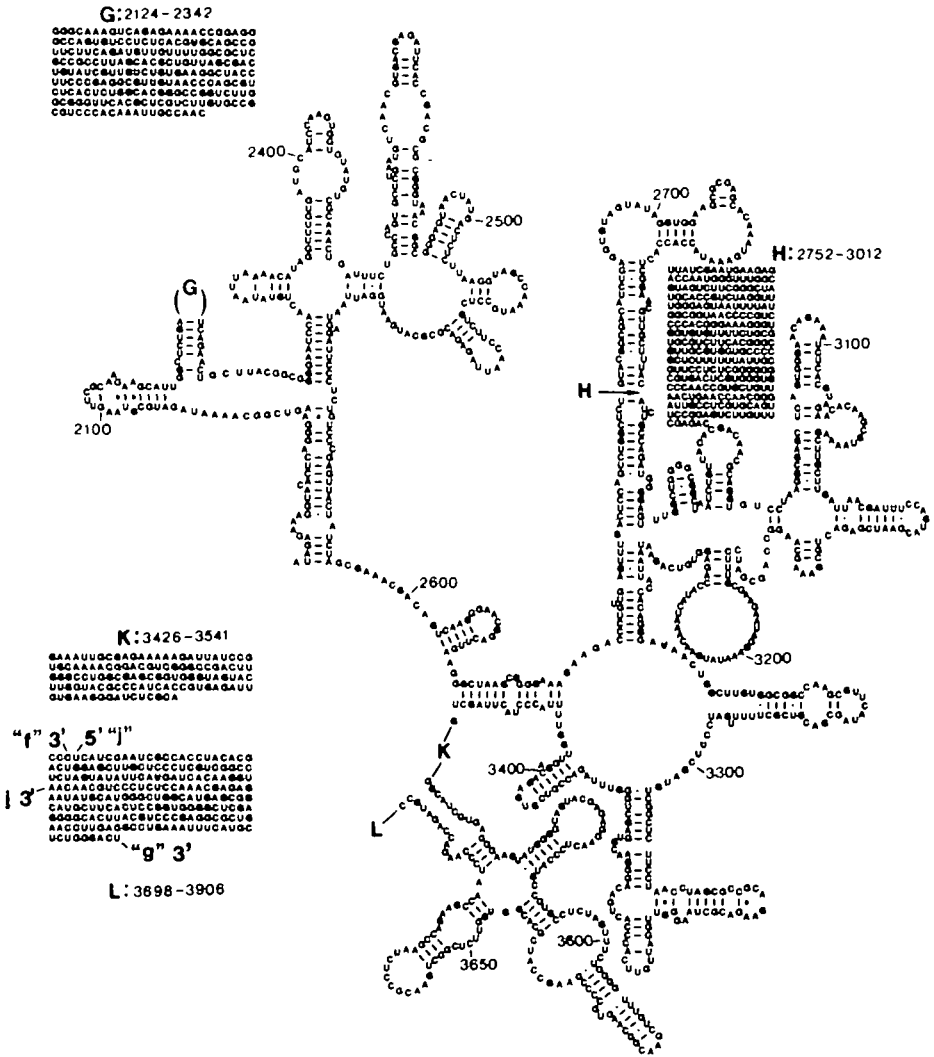

Fig.43b  
*Crithidia fasciculata*

Downloaded from https://academic.oup.com/nar/article/1/6/suppl/1/75/2358536 by guest on 20 April 2024
